# Supplementary material for: Reference data among general population and known-groups validity among hypertensive population of the EQ-5D-5L in Vietnam
Source: Springer Nature journal article supplement (doi:10.1007/s11136-021-02959-2), 2021-08-09
Supplement: MOESM1 [file 19555960]

*Title:* Reference data among general population and known-groups validity among hypertensive population of the EQ-5D-5L in Vietnam

**Journal name:** Quality of Life Research

**Author information:**

1. Vu Quynh Mai, MSc (Corresponding author). <sup>1</sup>Center for Population Health Sciences, Hanoi University of Public Health; <sup>2</sup>Department of Epidemiology and Global Health, Umeå University.  
ORCID: 0000-0001-6962-0564
2. Assoc. Prof. Kim Bao Giang, MD, Ph.D., Hanoi Medical University.  
ORCID: 0000-0003-2290-0205
3. Prof. Hoang Van Minh, MD, Ph.D., Hanoi University of Public Health.  
ORCID: 0000-0002-4749-5536
4. Prof. Lars Lindholm, Ph.D., Department of Epidemiology and Global Health, Umeå University  
ORCID: 0000-0002-1633-2179
5. Sun Sun, Ph.D., <sup>1</sup>Department of Epidemiology and Global Health, Umeå University; <sup>2</sup> Research group Health Outcomes and Economic Evaluation, Department of Learning, Informatics, Management and Ethics, Karolinska Institutet, Sweden  
ORCID: 0000-0001-5948-3025
6. Assoc. Prof. Klas Goran Sahlen, RN, MPH, Ph.D., Department of Epidemiology and Global Health, Umeå University  
ORCID: 0000-0002-3975-4868

**Contact of the corresponding author:**

Vu Quynh Mai, MSc. (last name underlined)

<sup>1</sup>Center for Population Health Sciences; Hanoi University of Public Health;

<sup>2</sup>Department of Epidemiology and Global Health, Umeå University

Email: [vqm@huph.edu.vn](mailto:vqm@huph.edu.vn)/ [mai.vu@umu.se](mailto:mai.vu@umu.se) Phone: (84) 971062521 ORCID: 0000-0001-6962-0564

Table 1a. Percentage of Females reporting the five dimensions by residence and age groups among general population.

|                              | Urban        |       |       |       |       |      |       |
|------------------------------|--------------|-------|-------|-------|-------|------|-------|
|                              | 18-24        | 25-34 | 35-44 | 45-54 | 55-64 | 65+  | Total |
| <b>Mobility</b>              |              |       |       |       |       |      |       |
| <i>No problems</i>           | 95           | 96.6  | 93.3  | 88.6  | 74.1  | 73.3 | 90    |
| <i>Slight problems</i>       | 5            | 3.4   | 6.7   | 11.4  | 22.2  | 20   | 9.1   |
| <i>Moderate problems</i>     | 0            | 0     | 0     | 0     | 0     | 6.7  | 0.5   |
| <i>Severe problems</i>       | 0            | 0     | 0     | 0     | 3.7   | 0    | 0.5   |
| <b>Self-care</b>             |              |       |       |       |       |      |       |
| <i>No problems</i>           | 100          | 100   | 97.8  | 100   | 96.3  | 93.3 | 98.6  |
| <i>Slight problems</i>       | 0            | 0     | 0     | 0     | 3.7   | 6.7  | 0.9   |
| <i>Moderate problems</i>     | 0            | 0     | 2.2   | 0     | 0     | 0    | 0.5   |
| <b>Usual activities</b>      |              |       |       |       |       |      |       |
| <i>No problems</i>           | 92.5         | 100   | 97.8  | 97.1  | 96.3  | 80   | 95.9  |
| <i>Slight problems</i>       | 7.5          | 0     | 2.2   | 2.9   | 3.7   | 20   | 4.1   |
| <b>Pain/ Discomfort</b>      |              |       |       |       |       |      |       |
| <i>No problems</i>           | 65           | 70.7  | 60    | 62.9  | 44.4  | 46.7 | 61.4  |
| <i>Slight problems</i>       | 35           | 25.9  | 33.3  | 31.4  | 44.4  | 33.3 | 32.7  |
| <i>Moderate problems</i>     | 0            | 3.4   | 6.7   | 2.9   | 11.1  | 20   | 5.5   |
| <i>Severe problems</i>       | 0            | 0     | 0     | 2.9   | 0     | 0    | 0.5   |
| <b>Anxiety/ Depression</b>   |              |       |       |       |       |      |       |
| <i>No problems</i>           | 57.5         | 77.6  | 82.2  | 82.9  | 63    | 80   | 74.1  |
| <i>Slight problems</i>       | 30           | 19    | 13.3  | 17.1  | 25.9  | 6.7  | 19.5  |
| <i>Moderate problems</i>     | 12.5         | 1.7   | 2.2   | 0     | 11.1  | 13.3 | 5.5   |
| <i>Severe problems</i>       | 0            | 0     | 2.2   | 0     | 0     | 0    | 0.5   |
| <i>Extreme problems</i>      | 0            | 1.7   | 0     | 0     | 0     | 0    | 0.5   |
| <b>Reporting full health</b> | 40           | 50    | 48.9  | 51.4  | 37    | 33.3 | 45.5  |
|                              | <b>Rural</b> |       |       |       |       |      |       |
| <b>Mobility</b>              |              |       |       |       |       |      |       |
| <i>No problems</i>           | 100          | 96.6  | 93.4  | 75    | 74.4  | 71   | 88.5  |
| <i>Slight problems</i>       | 0            | 3.4   | 5.3   | 23.5  | 23.1  | 25.8 | 10.5  |
| <i>Moderate problems</i>     | 0            | 0     | 0     | 0     | 2.6   | 3.2  | 0.5   |
| <i>Severe problems</i>       | 0            | 0     | 1.3   | 1.5   | 0     | 0    | 0.5   |
| <b>Self-care</b>             |              |       |       |       |       |      |       |
| <i>No problems</i>           | 100          | 99.1  | 98.7  | 97.1  | 89.7  | 93.5 | 97.4  |
| <i>Slight problems</i>       | 0            | 0.9   | 1.3   | 2.9   | 10.3  | 6.5  | 2.6   |
| <b>Usual activities</b>      |              |       |       |       |       |      |       |
| <i>No problems</i>           | 100          | 97.4  | 92.1  | 97.1  | 87.2  | 87.1 | 94.9  |
| <i>Slight problems</i>       | 0            | 2.6   | 3.9   | 2.9   | 12.8  | 12.9 | 4.3   |
| <i>Moderate problems</i>     | 0            | 0     | 3.9   | 0     | 0     | 0    | 0.8   |
| <b>Pain/ Discomfort</b>      |              |       |       |       |       |      |       |
| <i>No problems</i>           | 78.7         | 78.6  | 67.1  | 33.8  | 38.5  | 38.7 | 61.5  |
| <i>Slight problems</i>       | 21.3         | 19.7  | 31.6  | 48.5  | 51.3  | 45.2 | 32.4  |
| <i>Moderate problems</i>     | 0            | 1.7   | 0     | 11.8  | 7.7   | 16.1 | 4.6   |
| <i>Severe problems</i>       | 0            | 0     | 1.3   | 5.9   | 2.6   | 0    | 1.5   |
| <b>Anxiety/ Depression</b>   |              |       |       |       |       |      |       |
| <i>No problems</i>           | 80.3         | 83.8  | 81.6  | 76.5  | 69.2  | 77.4 | 79.6  |
| <i>Slight problems</i>       | 18           | 14.5  | 15.8  | 16.2  | 20.5  | 16.1 | 16.3  |
| <i>Moderate problems</i>     | 1.6          | 0     | 1.3   | 4.4   | 2.6   | 6.5  | 2     |
| <i>Severe problems</i>       | 0            | 1.7   | 1.3   | 2.9   | 7.7   | 0    | 2     |
| <b>Reporting full health</b> | 63.9         | 67.5  | 55.3  | 27.9  | 33.3  | 35.5 | 51.8  |

Note: Data presented in percentage

Table 1b. Percentage of Males reporting the five dimensions by residence and age groups among general population.

|                              | Urban |       |       |       |       |      |       |
|------------------------------|-------|-------|-------|-------|-------|------|-------|
|                              | 18-24 | 25-34 | 35-44 | 45-54 | 55-64 | 65+  | Total |
| <b>Mobility</b>              |       |       |       |       |       |      |       |
| <i>No problems</i>           | 100   | 96.6  | 96.9  | 89.3  | 92.6  | 88.9 | 95.6  |
| <i>Slight problems</i>       | 0     | 3.4   | 3.1   | 10.7  | 7.4   | 11.1 | 4.4   |
| <b>Self-care</b>             |       |       |       |       |       |      |       |
| <i>No problems</i>           | 100   | 100   | 100   | 96.4  | 96.3  | 100  | 99    |
| <i>Slight problems</i>       | 0     | 0     | 0     | 3.6   | 3.7   | 0    | 1     |
| <b>Usual activities</b>      |       |       |       |       |       |      |       |
| <i>No problems</i>           | 100   | 91.4  | 96.9  | 92.9  | 100   | 100  | 96.1  |
| <i>Slight problems</i>       | 0     | 8.6   | 3.1   | 7.1   | 0     | 0    | 3.9   |
| <b>Pain/ Discomfort</b>      |       |       |       |       |       |      |       |
| <i>No problems</i>           | 74    | 77.6  | 59.4  | 67.9  | 66.7  | 66.7 | 70.6  |
| <i>Slight problems</i>       | 20    | 17.2  | 40.6  | 28.6  | 29.6  | 33.3 | 25.5  |
| <i>Moderate problems</i>     | 6     | 5.2   | 0     | 3.6   | 0     | 0    | 3.4   |
| <i>Severe problems</i>       | 0     | 0     | 0     | 0     | 3.7   | 0    | 0.5   |
| <b>Anxiety/ Depression</b>   |       |       |       |       |       |      |       |
| <i>No problems</i>           | 80    | 86.2  | 71.9  | 85.7  | 81.5  | 100  | 82.4  |
| <i>Slight problems</i>       | 20    | 13.8  | 25    | 14.3  | 18.5  | 0    | 17.2  |
| <i>Extreme problems</i>      | 0     | 0     | 3.1   | 0     | 0     | 0    | 0.5   |
| <b>Reporting full health</b> | 62    | 62.1  | 50    | 60.7  | 55.6  | 66.7 | 59.3  |
|                              | Rural |       |       |       |       |      |       |
| <b>Mobility</b>              |       |       |       |       |       |      |       |
| <i>No problems</i>           | 97.1  | 94.4  | 91.7  | 87.5  | 84.1  | 54.5 | 89.8  |
| <i>Slight problems</i>       | 2.9   | 5.6   | 6     | 8.9   | 13.6  | 36.4 | 8.4   |
| <i>Moderate problems</i>     | 0     | 0     | 1.2   | 1.8   | 2.3   | 0    | 0.8   |
| <i>Severe problems</i>       | 0     | 0     | 1.2   | 1.8   | 0     | 9.1  | 1     |
| <b>Self-care</b>             |       |       |       |       |       |      |       |
| <i>No problems</i>           | 100   | 99.1  | 98.8  | 98.2  | 97.7  | 95.5 | 98.7  |
| <i>Slight problems</i>       | 0     | 0.9   | 0     | 1.8   | 2.3   | 0    | 0.8   |
| <i>Moderate problems</i>     | 0     | 0     | 1.2   | 0     | 0     | 4.5  | 0.5   |
| <b>Usual activities</b>      |       |       |       |       |       |      |       |
| <i>No problems</i>           | 100   | 95.4  | 96.4  | 92.9  | 88.6  | 90.9 | 95    |
| <i>Slight problems</i>       | 0     | 4.6   | 2.4   | 7.1   | 11.4  | 4.5  | 4.4   |
| <i>Moderate problems</i>     | 0     | 0     | 1.2   | 0     | 0     | 0    | 0.3   |
| <i>Severe problems</i>       | 0     | 0     | 0     | 0     | 0     | 4.5  | 0.3   |
| <b>Pain/ Discomfort</b>      |       |       |       |       |       |      |       |
| <i>No problems</i>           | 82.6  | 81.5  | 69    | 50    | 61.4  | 45.5 | 70    |
| <i>Slight problems</i>       | 14.5  | 18.5  | 26.2  | 46.4  | 31.8  | 36.4 | 26.1  |
| <i>Moderate problems</i>     | 2.9   | 0     | 2.4   | 3.6   | 2.3   | 18.2 | 2.9   |
| <i>Severe problems</i>       | 0     | 0     | 2.4   | 0     | 4.5   | 0    | 1     |
| <b>Anxiety/ Depression</b>   |       |       |       |       |       |      |       |
| <i>No problems</i>           | 81.2  | 85.2  | 81    | 89.3  | 86.4  | 77.3 | 83.8  |
| <i>Slight problems</i>       | 17.4  | 13.9  | 13.1  | 7.1   | 13.6  | 22.7 | 13.8  |
| <i>Moderate problems</i>     | 1.4   | 0.9   | 4.8   | 1.8   | 0     | 0    | 1.8   |
| <i>Severe problems</i>       | 0     | 0     | 1.2   | 1.8   | 0     | 0    | 0.5   |
| <b>Reporting full health</b> | 69.6  | 69.4  | 56    | 44.6  | 59.1  | 31.8 | 59.5  |

Note: Data presented in percentage

Table 1c. Percentage of hypertension groups reporting the five dimensions.

|                              | Non-hypertensive | Diagnosed for hypertension | Un-diagnosed for hypertension | Total |
|------------------------------|------------------|----------------------------|-------------------------------|-------|
| <b>Mobility</b>              |                  |                            |                               |       |
| <i>No problems</i>           | 92.5             | 83.2                       | 92.1                          | 89    |
| <i>Slight problems</i>       | 5.5              | 10.9                       | 6.6                           | 7.7   |
| <i>Moderate problems</i>     | 1.4              | 3.6                        | 0                             | 1.9   |
| <i>Severe problems</i>       | 0.5              | 1.5                        | 0.4                           | 0.8   |
| <i>Unable to walk</i>        | 0                | 0.8                        | 0.8                           | 0.5   |
| <b>Self-care</b>             |                  |                            |                               |       |
| No problems                  | 99.7             | 95                         | 98.8                          | 97.8  |
| Slight problems              | 0.3              | 3.6                        | 0.8                           | 1.6   |
| Moderate problems            | 0                | 0.4                        | 0.4                           | 0.2   |
| Severe problems              | 0                | 0.8                        | 0                             | 0.3   |
| Unable to wash or dress      | 0                | 0.2                        | 0                             | 0.1   |
| <b>Usual activities</b>      |                  |                            |                               |       |
| <i>No problems</i>           | 99.3             | 95.2                       | 97.9                          | 97.5  |
| <i>Slight problems</i>       | 0.7              | 3.1                        | 1.2                           | 1.7   |
| <i>Moderate problems</i>     | 0                | 1                          | 0.4                           | 0.5   |
| <i>Severe problems</i>       | 0                | 0.6                        | 0.4                           | 0.3   |
| <b>Pain/ Discomfort</b>      |                  |                            |                               |       |
| <i>No problems</i>           | 79.4             | 73.2                       | 83.1                          | 77.8  |
| <i>Slight problems</i>       | 18.4             | 21                         | 15.3                          | 18.8  |
| <i>Moderate problems</i>     | 1.9              | 3.6                        | 1.2                           | 2.4   |
| <i>Severe problems</i>       | 0.3              | 2.3                        | 0.4                           | 1.1   |
| <b>Anxiety/ Depression</b>   |                  |                            |                               |       |
| <i>No problems</i>           | 90.3             | 83.6                       | 88.4                          | 87.5  |
| <i>Slight problems</i>       | 8.8              | 13.8                       | 9.5                           | 10.8  |
| <i>Moderate problems</i>     | 0.7              | 2.1                        | 1.7                           | 1.4   |
| <i>Severe problems</i>       | 0.2              | 0.4                        | 0.4                           | 0.3   |
| <b>Reporting full health</b> | 71.9             | 62.7                       | 71.9                          | 68.5  |

Note: Data presented in percentage

**Table 2a. EQ-VAS and EQ-5D-5L indexes of Females by residence group.**

|                                 | Urban      |             |       |                |      | Rural       |             |       |                |      |
|---------------------------------|------------|-------------|-------|----------------|------|-------------|-------------|-------|----------------|------|
|                                 | n          | EQ-VAS      |       | EQ-5D-5L index |      | n           | EQ-VAS      |       | EQ-5D-5L index |      |
|                                 |            | Mean        | SD    | Mean           | SD   |             | Mean        | SD    | Mean           | SD   |
| Total                           | 220        | 80.91       | 13.46 | 0.93           | 0.09 | 392         | 80.09       | 13.84 | 0.93           | 0.09 |
| Age group**                     |            |             |       |                |      |             |             |       |                |      |
| <i>18-24</i>                    | 40 (18.2%) | 83.50       | 10.45 | 0.93           | 0.07 | 61 (15.6%)  | 83.56       | 9.72  | 0.97           | 0.05 |
| <i>25-34</i>                    | 58 (26.4%) | 83.66       | 9.95  | 0.95           | 0.06 | 117 (29.8%) | 84.49       | 11.76 | 0.97           | 0.06 |
| <i>35-44</i>                    | 45 (20.5%) | 81.87       | 13.80 | 0.94           | 0.08 | 76 (19.4%)  | 80.18       | 14.06 | 0.95           | 0.10 |
| <i>45-54</i>                    | 35 (15.9%) | 82.17       | 12.29 | 0.94           | 0.08 | 68 (17.3%)  | 77.00       | 14.34 | 0.88           | 0.11 |
| <i>55-64</i>                    | 27 (12.3%) | 70.74       | 18.33 | 0.89           | 0.12 | 39 (9.9%)   | 72.51       | 16.21 | 0.88           | 0.12 |
| <i>65+</i>                      | 15 (6.8%)  | 75.87       | 15.96 | 0.89           | 0.13 | 31 (7.9%)   | 72.74       | 15.27 | 0.89           | 0.12 |
| <i>Total</i>                    |            | 80.91       | 13.46 | 0.93           | 0.09 |             | 80.09       | 13.84 | 0.93           | 0.10 |
| p-value                         |            | <b>0.01</b> |       | 0.13           |      |             | <b>0.00</b> |       | <b>0.00</b>    |      |
| Highest education**             |            |             |       |                |      |             |             |       |                |      |
| <i>Primary and lower</i>        | 24 (10.9%) | 79.79       | 14.48 | 0.94           | 0.08 | 104 (26.5%) | 77.34       | 16.88 | 0.91           | 0.12 |
| <i>Secondary</i>                | 56 (25.5%) | 79.57       | 18.03 | 0.93           | 0.11 | 135 (34.4%) | 79.24       | 13.10 | 0.93           | 0.09 |
| <i>High school</i>              | 83 (37.7%) | 81.06       | 12.12 | 0.92           | 0.08 | 62 (15.8%)  | 82.50       | 10.03 | 0.96           | 0.07 |
| <i>Undergraduate and higher</i> | 57 (25.9%) | 82.47       | 9.14  | 0.95           | 0.07 | 91 (23.2%)  | 82.86       | 12.66 | 0.95           | 0.07 |
| <i>Total</i>                    |            | 80.91       | 13.46 | 0.93           | 0.09 |             | 80.09       | 13.84 | 0.93           | 0.10 |
| p-value                         |            | 0.91        |       | 0.26           |      |             | <b>0.04</b> |       | <b>0.00</b>    |      |
| Geographic regions**            |            |             |       |                |      |             |             |       |                |      |
| <i>Northern mountains</i>       | 22 (10.0%) | 78.00       | 16.18 | 0.92           | 0.10 | 52 (13.3%)  | 79.81       | 11.80 | 0.92           | 0.09 |
| <i>Red River delta</i>          | 47 (21.4%) | 81.15       | 11.05 | 0.94           | 0.08 | 94 (24.0%)  | 82.10       | 10.69 | 0.95           | 0.07 |
| <i>Highlands</i>                | 14 (6.4%)  | 75.00       | 11.60 | 0.89           | 0.14 | 27 (6.9%)   | 80.93       | 13.52 | 0.94           | 0.07 |
| <i>Central Coast</i>            | 37 (16.8%) | 82.65       | 12.06 | 0.94           | 0.07 | 94 (24.0%)  | 74.31       | 16.95 | 0.91           | 0.13 |
| <i>South-East</i>               | 70 (31.8%) | 81.81       | 11.53 | 0.93           | 0.08 | 41 (10.5%)  | 81.07       | 13.11 | 0.96           | 0.06 |
| <i>Mekong river delta</i>       | 30 (13.6%) | 81.17       | 19.99 | 0.95           | 0.09 | 84 (21.4%)  | 83.74       | 13.02 | 0.94           | 0.10 |
| <i>Total</i>                    |            | 80.91       | 13.46 | 0.93           | 0.09 |             | 80.09       | 13.84 | 0.93           | 0.10 |
| p-value                         |            | 0.33        |       | 0.58           |      |             | <b>0.00</b> |       | 0.17           |      |

|                                   |             |       |       |      |      |             |             |       |             |      |
|-----------------------------------|-------------|-------|-------|------|------|-------------|-------------|-------|-------------|------|
| Ethnicity *                       |             |       |       |      |      |             |             |       |             |      |
| <i>Kinh (as majority)</i>         | 210 (95.5%) | 80.88 | 13.62 | 0.93 | 0.09 | 345 (88.0%) | 80.62       | 13.87 | 0.94        | 0.09 |
| <i>Others</i>                     | 10 (4.5%)   | 81.50 | 10.01 | 0.93 | 0.08 | 47 (12.0%)  | 76.17       | 13.07 | 0.90        | 0.11 |
| <i>Total</i>                      |             | 80.91 | 13.46 | 0.93 | 0.09 |             | 80.09       | 13.84 | 0.93        | 0.10 |
| p-value                           |             | 0.98  |       | 0.54 |      |             | <b>0.02</b> |       | <b>0.00</b> |      |
| Religion*                         |             |       |       |      |      |             |             |       |             |      |
| <i>Having no religion</i>         | 157 (71.4%) | 80.54 | 14.33 | 0.93 | 0.09 | 323 (82.4%) | 81.00       | 13.22 | 0.93        | 0.09 |
| <i>Having religion</i>            | 63 (28.6%)  | 81.84 | 11.05 | 0.94 | 0.07 | 69 (17.6%)  | 75.84       | 15.86 | 0.93        | 0.11 |
| <i>Total</i>                      |             | 80.91 | 13.46 | 0.93 | 0.09 |             | 80.09       | 13.84 | 0.93        | 0.10 |
| p-value                           |             | 0.82  |       | 0.29 |      |             | <b>0.01</b> |       | 0.86        |      |
| Marital status**                  |             |       |       |      |      |             |             |       |             |      |
| <i>Single</i>                     | 41 (18.6%)  | 82.44 | 12.15 | 0.92 | 0.08 | 38 (9.7%)   | 81.97       | 12.39 | 0.97        | 0.04 |
| <i>Married</i>                    | 156 (70.9%) | 80.47 | 13.97 | 0.93 | 0.09 | 319 (81.4%) | 80.28       | 13.78 | 0.93        | 0.10 |
| <i>Separated/Widowed/Divorced</i> | 23 (10.5%)  | 81.13 | 12.44 | 0.94 | 0.10 | 35 (8.9%)   | 76.29       | 15.50 | 0.89        | 0.11 |
| <i>Total</i>                      |             | 80.91 | 13.46 | 0.93 | 0.09 |             | 80.09       | 13.84 | 0.93        | 0.10 |
| p-value                           |             | 0.74  |       | 0.57 |      |             | 0.25        |       | <b>0.01</b> |      |
| Occupation**                      |             |       |       |      |      |             |             |       |             |      |
| <i>Having paid work</i>           | 132 (60.0%) | 81.58 | 12.31 | 0.94 | 0.09 | 271 (69.1%) | 80.86       | 13.69 | 0.94        | 0.09 |
| <i>Student/Retired/Housewives</i> | 87 (39.5%)  | 79.97 | 15.13 | 0.93 | 0.08 | 117 (29.8%) | 78.66       | 13.78 | 0.92        | 0.10 |
| <i>Unemployed</i>                 | 1 (0.5%)    | 75.00 |       | 0.92 |      | 4 (1.0%)    | 70.00       | 21.60 | 0.87        | 0.21 |
| <i>Total</i>                      |             | 80.91 | 13.46 | 0.93 | 0.09 |             | 80.09       | 13.84 | 0.93        | 0.10 |
| p-value                           |             | 0.61  |       | 0.30 |      |             | 0.14        |       | 0.31        |      |
| Having health insurance*          |             |       |       |      |      |             |             |       |             |      |
| <i>No</i>                         | 40 (18.2%)  | 82.85 | 13.87 | 0.93 | 0.10 | 97 (24.7%)  | 81.01       | 13.11 | 0.95        | 0.07 |
| <i>Yes</i>                        | 180 (81.8%) | 80.48 | 13.37 | 0.93 | 0.08 | 295 (75.3%) | 79.79       | 14.08 | 0.93        | 0.10 |
| <i>Total</i>                      |             | 80.91 | 13.46 | 0.93 | 0.09 |             | 80.09       | 13.84 | 0.93        | 0.10 |
| p-value                           |             | 0.29  |       | 0.51 |      |             | 0.52        |       | <b>0.03</b> |      |

Notes: \*Results from Mann-Whitney tests\*\*. Results from Kruskal Wallis H-Tests. SD: Standard Deviation; n number of individuals.

Table 2b. EQ-VAS and EQ-5D-5L indexes of Males by residence group.

|                                 | Urban      |        |       |                |      | Rural       |             |       |                |      |
|---------------------------------|------------|--------|-------|----------------|------|-------------|-------------|-------|----------------|------|
|                                 | n          | EQ-VAS |       | EQ-5D-5L index |      | n           | EQ-VAS      |       | EQ-5D-5L index |      |
|                                 |            | Mean   | SD    | Mean           | SD   |             | Mean        | SD    | Mean           | SD   |
| Age group**                     |            |        |       |                |      |             |             |       |                |      |
| <i>18-24</i>                    | 50 (24.5%) | 84.24  | 8.71  | 0.96           | 0.06 | 69 (18.0%)  | 84.30       | 11.79 | 0.97           | 0.05 |
| <i>25-34</i>                    | 58 (28.4%) | 84.60  | 12.55 | 0.96           | 0.06 | 108 (28.2%) | 84.46       | 10.02 | 0.97           | 0.05 |
| <i>35-44</i>                    | 32 (15.7%) | 82.09  | 12.76 | 0.94           | 0.08 | 84 (21.9%)  | 82.96       | 14.05 | 0.94           | 0.10 |
| <i>45-54</i>                    | 28 (13.7%) | 82.68  | 12.58 | 0.95           | 0.08 | 56 (14.6%)  | 76.70       | 13.73 | 0.93           | 0.09 |
| <i>55-64</i>                    | 27 (13.2%) | 78.52  | 14.21 | 0.95           | 0.08 | 44 (11.5%)  | 77.09       | 14.70 | 0.93           | 0.10 |
| <i>65+</i>                      | 9 (4.4%)   | 77.89  | 12.20 | 0.96           | 0.06 | 22 (5.7%)   | 70.68       | 16.78 | 0.87           | 0.15 |
| <i>Total</i>                    |            | 82.76  | 12.05 | 0.96           | 0.07 |             | 81.33       | 13.40 | 0.95           | 0.09 |
| p-value                         |            | 0.33   |       | 0.88           |      |             | <b>0.00</b> |       | <b>0.00</b>    |      |
| Highest education**             |            |        |       |                |      |             |             |       |                |      |
| <i>Primary and lower</i>        | 18 (8.8%)  | 83.11  | 12.72 | 0.95           | 0.06 | 63 (16.4%)  | 75.86       | 16.12 | 0.91           | 0.14 |
| <i>Secondary</i>                | 38 (18.6%) | 80.63  | 13.28 | 0.94           | 0.09 | 141 (36.8%) | 80.31       | 13.49 | 0.94           | 0.08 |
| <i>High school</i>              | 76 (37.3%) | 83.08  | 11.44 | 0.96           | 0.06 | 92 (24.0%)  | 83.51       | 12.25 | 0.97           | 0.07 |
| <i>Undergraduate and higher</i> | 72 (35.3%) | 83.44  | 11.98 | 0.95           | 0.06 | 87 (22.7%)  | 84.66       | 10.71 | 0.96           | 0.06 |
| <i>Total</i>                    |            | 82.76  | 12.05 | 0.96           | 0.07 |             | 81.33       | 13.40 | 0.95           | 0.09 |
| p-value                         |            | 0.69   |       | 0.45           |      |             | <b>0.00</b> |       | <b>0.03</b>    |      |
| Geographic regions**            |            |        |       |                |      |             |             |       |                |      |
| <i>Northern mountains</i>       | 17 (8.3%)  | 78.24  | 11.85 | 0.96           | 0.07 | 55 (14.4%)  | 81.80       | 13.18 | 0.93           | 0.11 |
| <i>Red River delta</i>          | 43 (21.1%) | 84.44  | 12.80 | 0.96           | 0.07 | 86 (22.5%)  | 81.29       | 12.82 | 0.95           | 0.07 |
| <i>Highlands</i>                | 13 (6.4%)  | 85.77  | 8.13  | 0.96           | 0.09 | 26 (6.8%)   | 79.04       | 14.70 | 0.94           | 0.09 |
| <i>Central Coast</i>            | 36 (17.6%) | 78.92  | 12.85 | 0.95           | 0.07 | 92 (24.0%)  | 78.99       | 15.15 | 0.94           | 0.11 |
| <i>South-East</i>               | 67 (32.8%) | 83.66  | 11.94 | 0.95           | 0.07 | 36 (9.4%)   | 82.69       | 11.41 | 0.96           | 0.08 |
| <i>Mekong river delta</i>       | 28 (13.7%) | 84.29  | 10.78 | 0.96           | 0.05 | 88 (23.0%)  | 83.65       | 12.30 | 0.96           | 0.06 |
| <i>Total</i>                    |            | 82.76  | 12.05 | 0.96           | 0.07 |             | 81.33       | 13.40 | 0.95           | 0.09 |
| p-value                         |            | 0.10   |       | 0.90           |      |             | 0.41        |       | 0.92           |      |

|                                   |             |       |       |      |      |             |             |       |      |      |
|-----------------------------------|-------------|-------|-------|------|------|-------------|-------------|-------|------|------|
| Ethnicity *                       |             |       |       |      |      |             |             |       |      |      |
| <i>Kinh (as majority)</i>         | 201 (98.5%) | 82.66 | 12.09 | 0.96 | 0.07 | 349 (91.1%) | 81.24       | 13.47 | 0.95 | 0.08 |
| <i>Others</i>                     | 3 (1.5%)    | 89.00 | 8.54  | 0.95 | 0.09 | 34 (8.9%)   | 82.24       | 12.79 | 0.94 | 0.13 |
| <i>Total</i>                      |             | 82.76 | 12.05 | 0.96 | 0.07 |             | 81.33       | 13.40 | 0.95 | 0.09 |
| p-value                           |             | 0.38  |       | 0.93 |      |             | 0.83        |       | 0.82 |      |
| Religion*                         |             |       |       |      |      |             |             |       |      |      |
| <i>Having no religion</i>         | 157 (77.0%) | 82.61 | 12.51 | 0.95 | 0.07 | 322 (84.1%) | 81.45       | 13.04 | 0.95 | 0.09 |
| <i>Having religion</i>            | 47 (23.0%)  | 83.26 | 10.48 | 0.96 | 0.07 | 61 (15.9%)  | 80.72       | 15.25 | 0.94 | 0.09 |
| <i>Total</i>                      |             | 82.76 | 12.05 | 0.96 | 0.07 |             | 81.33       | 13.40 | 0.95 | 0.09 |
| p-value                           |             | 0.95  |       | 0.70 |      |             | 0.91        |       | 0.15 |      |
| Marital status**                  |             |       |       |      |      |             |             |       |      |      |
| <i>Single</i>                     | 72 (35.3%)  | 84.64 | 9.52  | 0.96 | 0.06 | 100 (26.1%) | 83.62       | 11.70 | 0.97 | 0.06 |
| <i>Married</i>                    | 126 (61.8%) | 81.57 | 13.28 | 0.95 | 0.08 | 272 (71.0%) | 80.91       | 13.66 | 0.94 | 0.09 |
| <i>Separated/Widowed/Divorced</i> | 6 (2.9%)    | 85.00 | 10.49 | 0.95 | 0.06 | 11 (2.9%)   | 70.91       | 16.40 | 0.89 | 0.17 |
| <i>Total</i>                      |             | 82.76 | 12.05 | 0.96 | 0.07 |             | 81.33       | 13.40 | 0.95 | 0.09 |
| p-value                           |             | 0.47  |       | 0.78 |      |             | <b>0.03</b> |       | 0.07 |      |
| Occupation**                      |             |       |       |      |      |             |             |       |      |      |
| <i>Having paid work</i>           | 149 (73.0%) | 82.90 | 12.37 | 0.95 | 0.07 | 323 (84.3%) | 82.31       | 12.62 | 0.95 | 0.08 |
| <i>Student/Retired/Housewives</i> | 52 (25.5%)  | 82.21 | 11.52 | 0.96 | 0.06 | 41 (10.7%)  | 80.56       | 15.48 | 0.95 | 0.08 |
| <i>Unemployed</i>                 | 3 (1.5%)    | 85.00 | 5.00  | 0.97 | 0.05 | 19 (5.0%)   | 66.32       | 13.00 | 0.87 | 0.17 |
| <i>Total</i>                      |             | 82.76 | 12.05 | 0.96 | 0.07 |             | 81.33       | 13.40 | 0.95 | 0.09 |
| p-value                           |             | 0.85  |       | 0.74 |      |             | <b>0.00</b> |       | 0.15 |      |
| Having health insurance*          |             |       |       |      |      |             |             |       |      |      |
| <i>No</i>                         | 34 (16.7%)  | 78.27 | 15.27 | 0.96 | 0.06 | 119 (31.1%) | 79.72       | 13.72 | 0.96 | 0.07 |
| <i>Yes</i>                        | 170 (83.3%) | 83.65 | 11.14 | 0.95 | 0.07 | 264 (68.9%) | 82.06       | 13.21 | 0.94 | 0.09 |
| <i>Total</i>                      |             | 82.76 | 12.05 | 0.96 | 0.07 |             | 81.33       | 13.40 | 0.95 | 0.09 |
| p-value                           |             | 0.09  |       | 0.77 |      |             | 0.09        |       | 0.32 |      |

Notes: \*Results from Mann-Whitney tests\*\*. Results from Kruskal Wallis H-Tests. SD: Standard Deviation; n: number of individuals.



**Table 2c. Post-hoc analysis on difference of the EQ-VAS indexes among general population sample**

| Age group                         | 18-24                     | 25-34                                   | 35-44              | 45-54                | 55-64             |
|-----------------------------------|---------------------------|-----------------------------------------|--------------------|----------------------|-------------------|
| <i>25-34</i>                      | 0.39 (1.00)               |                                         |                    |                      |                   |
| <i>35-44</i>                      | -2.22 (0.00)              | -2.61 (0.25)                            |                    |                      |                   |
| <i>45-54</i>                      | -5.24 (0.00)              | -5.63 (0.00)                            | -3.91 (0.25)       |                      |                   |
| <i>55-64</i>                      | -9.15 (0.00)              | -9.54 (0.00)                            | -6.93 (0.00)       | -3.91 (0.11)         |                   |
| <i>65+</i>                        | -10.60 (0.00)             | -10.99 (0.00)                           | -8.38 (0.00)       | -5.36 (0.003)        | -1.45 (1.00)      |
| Highest education                 | <b>Primary and lower</b>  | <b>Secondary</b>                        | <b>High school</b> |                      |                   |
| <i>Secondary</i>                  | 2.17 (0.35)               |                                         |                    |                      |                   |
| <i>High school</i>                | 4.88 (0.00)               | 2.72 (0.05)                             |                    |                      |                   |
| <i>Undergraduate and higher</i>   | 5.76 (0.00)               | 3.59 (0.00)                             | 0.87 (1.00)        |                      |                   |
| Geographic regions                | <b>Northern mountains</b> | <b>Red River delta</b>                  | <b>Highlands</b>   | <b>Central Coast</b> | <b>South-East</b> |
| <i>Red River delta</i>            | 1.95 (1.00)               |                                         |                    |                      |                   |
| <i>Highlands</i>                  | -0.04 (1.00)              | -1.99 (1.00)                            |                    |                      |                   |
| <i>Central Coast</i>              | -2.29 (1.00)              | -4.25 (0.00)                            | -2.26 (1.00)       |                      |                   |
| <i>South-East</i>                 | 2.33 (1.00)               | 0.38 (1.00)                             | 2.37 (1.00)        | 4.63 (0.00)          |                   |
| <i>Mekong river delta</i>         | 3.33 (0.26)               | 1.39 (1.00)                             | 3.37 (0.74)        | 5.63 (0.00)          | 1.00 (1.00)       |
| Marital status                    | <b>Single</b>             | <b>Married</b>                          |                    |                      |                   |
| <i>Married</i>                    | -2.77 (0.01)              |                                         |                    |                      |                   |
| <i>Separated/Widowed/Divorced</i> | -5.79 (0.00)              | -3.02 (0.18)                            |                    |                      |                   |
| Occupation                        | <b>Having paid work</b>   | <b>Student/ Retired/<br/>Housewives</b> |                    |                      |                   |
| <i>Student/Retired/Housewives</i> | -1.92 (0.09)              |                                         |                    |                      |                   |
| <i>Unemployed</i>                 | -12.59 (0.00)             | -10.67 (0.00)                           |                    |                      |                   |

Notes: Results presented as mean difference of EQ-VAS (*p*-value) by pair.

**Table 2d. Post-hoc analysis on difference of the EQ-5D-5L indexes among general population sample**

| Age group                         | 18-24                     | 25-34                                   | 35-44              | 45-54                | 55-64             |
|-----------------------------------|---------------------------|-----------------------------------------|--------------------|----------------------|-------------------|
| <i>25-34</i>                      | 0.00 (1.00)               |                                         |                    |                      |                   |
| <i>35-44</i>                      | -0.02 (0.35)              | -0.02 (0.05)                            |                    |                      |                   |
| <i>45-54</i>                      | -0.04 (0.35)              | -0.05 (0.00)                            | -0.02 (0.05)       |                      |                   |
| <i>55-64</i>                      | -0.04 (0.00)              | -0.05 (0.00)                            | -0.03 (0.01)       | -0.01 (1.00)         |                   |
| <i>65+</i>                        | -0.07 (0.00)              | -0.07 (0.00)                            | -0.05 (0.00)       | -0.02 (0.49)         | -0.02 (1.00)      |
| Highest education                 | <b>Primary and lower</b>  | <b>Secondary</b>                        | <b>High school</b> |                      |                   |
| <i>Secondary</i>                  | 0.02 (0.09)               |                                         |                    |                      |                   |
| <i>High school</i>                | 0.04 (0.00)               | 0.02 (0.04)                             |                    |                      |                   |
| <i>Undergraduate and higher</i>   | 0.04 (0.00)               | 0.02 (0.04)                             | -0.00 (1.00)       |                      |                   |
| Geographic regions                | <b>Northern mountains</b> | <b>Red River delta</b>                  | <b>Highlands</b>   | <b>Central Coast</b> | <b>South-East</b> |
| <i>Red River delta</i>            | 0.02 (0.59)               |                                         |                    |                      |                   |
| <i>Highlands</i>                  | 0.01 (1.00)               | -0.01 (0.19)                            |                    |                      |                   |
| <i>Central Coast</i>              | -0.00 (1.00)              | -0.02 (0.19)                            | -0.01 (1.00)       |                      |                   |
| <i>South-East</i>                 | 0.02 (0.68)               | 0.00 (1.00)                             | 0.01 (1.00)        | 0.02 (0.26)          |                   |
| <i>Mekong river delta</i>         | 0.02 (0.42)               | 0.00 (1.00)                             | 0.01 (1.00)        | 0.02 (0.13)          | 0.00 (1.00)       |
| Marital status                    | <b>Single</b>             | <b>Married</b>                          |                    |                      |                   |
| <i>Married</i>                    | -0.02 (0.01)              |                                         |                    |                      |                   |
| <i>Separated/Widowed/Divorced</i> | -0.05 (0.00)              | -0.03 (0.02)                            |                    |                      |                   |
| Occupation                        | <b>Having paid work</b>   | <b>Student/ Retired/<br/>Housewives</b> |                    |                      |                   |
| <i>Student/Retired/Housewives</i> | -0.01 (0.22)              |                                         |                    |                      |                   |
| <i>Unemployed</i>                 | -0.06 (0.00)              | -0.05 (0.02)                            |                    |                      |                   |

Notes: Results presented as mean difference of EQ-5D-5L indexes (*p*-value) by pair.

**Table 3a. Post-hoc analysis on difference of the EQ-VAS among CH2' sample**

|                         | Non-hypertensive group |               | Diagnosed for hypertension group |              |
|-------------------------|------------------------|---------------|----------------------------------|--------------|
| <b>Age group</b>        |                        |               | <b>40-49</b>                     | <b>50-59</b> |
| 50-59                   |                        |               | -3.00 (0.34)                     |              |
| 60+                     |                        |               | -6.00 (0.01)                     | -3.00 (0.39) |
| <b>BMI level</b>        | <b>Underweight</b>     | <b>Normal</b> |                                  |              |
| 18.5-24.9 (normal)      | 6.00 (0.02)            |               |                                  |              |
| >25 (overweight/ obese) | 8.00 (0.00)            | 2.00 (0.59)   |                                  |              |

Notes: Results presented as mean difference of EQ-VAS (p-value) by pair.

**Table 3b. Post-hoc analysis on difference of the EQ-5D-5L indexes among CH2' sample**

|                          | Non-hypertensive group |                  | Diagnosed for hypertension group |                  | Undiagnosed for hypertension group |                |
|--------------------------|------------------------|------------------|----------------------------------|------------------|------------------------------------|----------------|
| <b>Age group</b>         | <b>40-49</b>           | <b>50-59</b>     |                                  |                  |                                    |                |
| 50-59                    | -0.02 (0.03)           |                  |                                  |                  |                                    |                |
| 60+                      | -0.01 (1.00)           | 0.01 (0.74)      |                                  |                  |                                    |                |
| <b>Highest education</b> | <b>Primary</b>         | <b>Secondary</b> | <b>Primary</b>                   | <b>Secondary</b> |                                    |                |
| Secondary                | 0.01 (0.13)            |                  | 0.03 (0.09)                      |                  |                                    |                |
| High school or higher    | 0.02 (0.04)            | 0.00 (1.00)      | 0.03 (0.15)                      | -0.00 (1.00)     |                                    |                |
| <b>Marital status</b>    |                        |                  |                                  |                  | <b>Single</b>                      | <b>Married</b> |
| Married                  |                        |                  |                                  |                  | 0.01 (1.00)                        |                |
| Separate/divorce/widow   |                        |                  |                                  |                  | -0.06 (1.00)                       | -0.07 (0.00)   |

Notes: Results presented as mean difference of EQ-5D-5L indexes (p-value) by pair.
