# Supplementary material for: Reference data among general population and known-groups validity among hypertensive population of the EQ-5D-5L in Vietnam
Source: Qual Life Res. 2021 Aug 9;31(2):539–50. doi: 10.1007/s11136-021-02959-2 (PMC8847252; doi:10.1007/s11136-021-02959-2)
Supplement: Supplementary file 2 — Supplementary file2 (XLSX 210 kb) [file 11136_2021_2959_MOESM2_ESM.xlsx]

## Sheet: Cover
Title: Reference data among general population and known-groups validity among hypertensive population of the EQ-5D-5L in Vietnam
Journal name: Quality of Life Research
Author information:
1. Vu Quynh Mai, MSc (Corresponding author). 1Center for Population Health Sciences, Hanoi University of Public Health; 2Department of Epidemiology and Global Health, Umeå University.
ORCID: 0000-0001-6962-0564
2. Assoc. Prof. Kim Bao Giang, MD, Ph.D., Hanoi Medical University.
ORICD: 0000-0003-2290-0205
3. Prof. Hoang Van Minh, MD, Ph.D., Hanoi University of Public Health.
ORICD: 0000-0002-4749-5536
4. Prof. Lars Lindholm, Ph.D., Department of Epidemiology and Global Health, Umeå University
ORICD: 0000-0002-1633-2179
5. Sun Sun, Ph.D., 1Department of Epidemiology and Global Health, Umeå University; 2 Research group Health Outcomes and Economic Evaluation, Department of Learning, Informatics, Management and Ethics, Karolinska Instiutet, Sweden
ORICD: 0000-0001-5948-3025
6. Assoc. Prof. Klas Goran Sahlen, RN, MPH, Ph.D., Department of Epidemiology and Global Health, Umeå University
ORICD: 0000-0002-3975-4868
Contact of the corresponding author:
Vu Quynh Mai, MSc. (last name underlined)
1Center for Population Health Sciences; Hanoi University of Public Health;
2Department of Epidemiology and Global Health, Umeå University
Email: vqm@huph.edu.vn/ mai.vu@umu.se Phone: (84) 971062521	ORCID: 0000-0001-6962-0564

## Sheet: EQ-5D-5L population norms
id	mo	sc	ua	pd	ad	vas	age	value	sex	region	residence	ethnicity	religion	marital status	edu	occupation	Having health insurance
168334	1	1	1	2	1	65	37	0.9161	MALE	Red River delta	RURAL	KINH	No	Married	High school	Having paid work	YES
168355	1	1	1	1	1	80	29	1	FEMALE	Red River delta	URBAN	KINH	No	Married	High school	Having paid work	YES
168356	1	1	1	1	1	100	66	1	FEMALE	Red River delta	URBAN	KINH	No	Married	Secondary school	Student/retired/Having unpaid work	YES
168357	1	1	1	1	1	90	60	1	MALE	Red River delta	URBAN	KINH	No	Married	Secondary school	Student/retired/Having unpaid work	YES
168358	1	1	1	1	2	90	21	0.9362	MALE	Red River delta	URBAN	KINH	No	Single	High school	Student/retired/Having unpaid work	YES
168359	1	1	1	2	1	70	28	0.9161	FEMALE	Red River delta	URBAN	KINH	No	Married	Higher	Having paid work	YES
168360	2	2	1	2	1	70	57	0.8041	MALE	Red River delta	URBAN	KINH	No	Married	Higher	Student/retired/Having unpaid work	YES
168361	1	1	1	1	1	80	30	1	FEMALE	Red River delta	URBAN	KINH	No	Married	Secondary school	Having paid work	YES
168362	1	1	1	2	1	90	49	0.9161	FEMALE	Red River delta	URBAN	KINH	No	Married	Primary school and lower	Having paid work	NO
168363	1	1	1	1	1	80	22	1	MALE	Red River delta	URBAN	KINH	No	Single	Higher	Student/retired/Having unpaid work	NO
168364	1	1	1	1	1	70	27	1	FEMALE	Red River delta	URBAN	KINH	No	Married	Higher	Having paid work	YES
168365	1	1	1	1	1	80	60	1	FEMALE	Red River delta	URBAN	KINH	No	Married	Secondary school	Student/retired/Having unpaid work	NO
168366	1	1	1	1	1	90	31	1	FEMALE	Red River delta	URBAN	KINH	No	Married	Secondary school	Having paid work	NO
168367	2	1	1	3	1	50	20	0.7787	MALE	Red River delta	RURAL	KINH	No	Single	High school	Having paid work	NO
168368	2	1	2	2	1	80	49	0.8005	FEMALE	Red River delta	RURAL	KINH	No	Married	Secondary school	Having paid work	YES
168369	1	1	1	1	1	80	25	1	FEMALE	Red River delta	RURAL	KINH	No	Married	Higher	Having paid work	YES
168370	1	1	1	1	1	80	41	1	MALE	Red River delta	RURAL	KINH	No	Married	Secondary school	Having paid work	YES
168371	1	1	1	1	1	95	55	1	MALE	Red River delta	RURAL	KINH	No	Married	Secondary school	Having paid work	NO
168372	1	1	1	1	1	100	27	1	FEMALE	Red River delta	RURAL	KINH	No	Married	High school	Having paid work	YES
168373	1	1	1	2	1	80	34	0.9161	FEMALE	Red River delta	RURAL	KINH	No	Married	High school	Having paid work	NO
168376	1	1	1	2	1	80	57	0.9161	FEMALE	Red River delta	URBAN	KINH	No	Married	High school	Student/retired/Having unpaid work	YES
168377	1	1	1	1	1	70	64	1	MALE	Red River delta	URBAN	KINH	No	Married	High school	Student/retired/Having unpaid work	YES
168378	1	1	1	1	1	90	37	1	MALE	Red River delta	URBAN	KINH	Yes	Married	Higher	Having paid work	YES
168379	1	1	1	1	2	80	28	0.9362	FEMALE	Red River delta	URBAN	KINH	No	Married	Higher	Having paid work	YES
168380	1	1	1	2	1	85	19	0.9161	FEMALE	Red River delta	URBAN	KINH	No	Single	High school	Student/retired/Having unpaid work	YES
168381	1	1	1	1	2	80	23	0.9362	MALE	Red River delta	URBAN	KINH	No	Single	High school	Student/retired/Having unpaid work	YES
168382	1	1	1	1	2	90	27	0.9362	MALE	Red River delta	URBAN	KINH	No	Single	Higher	Having paid work	YES
168383	1	1	1	1	1	98	18	1	MALE	Red River delta	URBAN	KINH	No	Single	High school	Student/retired/Having unpaid work	YES
168384	1	1	1	2	1	60	42	0.9161	FEMALE	Red River delta	URBAN	KINH	No	Married	High school	Having paid work	NO
168436	1	1	1	1	2	80	31	0.9362	FEMALE	Red River delta	URBAN	KINH	No	Married	Higher	Student/retired/Having unpaid work	NO
168437	1	1	1	1	1	91	31	1	MALE	Red River delta	URBAN	KINH	No	Married	Higher	Having paid work	YES
168438	1	1	1	2	1	71	68	0.9161	MALE	Red River delta	URBAN	KINH	No	Married	Higher	Student/retired/Having unpaid work	YES
168440	1	1	1	1	1	100	63	1	MALE	Red River delta	URBAN	KINH	No	Married	High school	Student/retired/Having unpaid work	YES
168441	1	1	1	1	1	81	18	1	MALE	Red River delta	URBAN	KINH	No	Single	High school	Student/retired/Having unpaid work	YES
168442	1	1	1	1	1	80	32	1	MALE	Red River delta	URBAN	KINH	No	Married	Higher	Having paid work	NO
168443	1	1	1	1	1	95	33	1	MALE	Red River delta	URBAN	KINH	Yes	Married	Higher	Having paid work	YES
168444	1	1	1	1	1	100	37	1	MALE	Red River delta	URBAN	KINH	No	Married	Higher	Having paid work	YES
168445	1	1	1	1	1	91	26	1	MALE	Red River delta	RURAL	KINH	No	Married	High school	Having paid work	YES
168446	1	1	1	3	2	61	45	0.7841	FEMALE	Red River delta	RURAL	KINH	No	Married	Secondary school	Having paid work	YES
168447	1	1	1	1	1	81	33	1	MALE	Red River delta	RURAL	KINH	No	Married	High school	Having paid work	NO
168448	1	1	1	1	1	81	42	1	FEMALE	Red River delta	RURAL	KINH	No	Married	Secondary school	Having paid work	YES
168449	1	1	1	2	1	60	54	0.9161	MALE	Red River delta	RURAL	KINH	No	Divorce/widow/separate/other	Secondary school	Having paid work	YES
168450	1	1	1	1	1	90	33	1	MALE	Red River delta	RURAL	KINH	No	Married	Higher	Having paid work	YES
168451	1	1	1	2	1	100	45	0.9161	FEMALE	Red River delta	RURAL	KINH	No	Married	Secondary school	Having paid work	YES
168452	1	1	1	2	1	90	29	0.9161	FEMALE	Red River delta	RURAL	KINH	No	Married	Higher	Having paid work	YES
168453	1	1	1	1	1	100	34	1	MALE	Red River delta	RURAL	KINH	No	Married	High school	Having paid work	NO
168455	1	1	1	2	1	90	33	0.9161	FEMALE	Red River delta	URBAN	KINH	No	Married	Higher	Having paid work	YES
168457	1	1	1	2	1	80	27	0.9161	FEMALE	Red River delta	URBAN	KINH	No	Married	Higher	Having paid work	YES
168458	1	1	1	1	1	80	28	1	FEMALE	Red River delta	URBAN	KINH	No	Married	Higher	Having paid work	YES
168459	1	1	1	1	1	80	26	1	MALE	Red River delta	URBAN	KINH	No	Single	Higher	Having paid work	YES
168460	1	1	1	1	1	90	18	1	FEMALE	Red River delta	URBAN	KINH	No	Single	High school	Student/retired/Having unpaid work	YES
168461	1	1	1	1	1	80	46	1	MALE	Red River delta	URBAN	KINH	No	Married	Higher	Having paid work	YES
168462	1	1	1	1	1	90	36	1	FEMALE	Red River delta	URBAN	OTHER_MINORITY_GROUP_SPECIFY	No	Married	Higher	Having paid work	YES
168465	1	1	1	1	1	80	48	1	MALE	Red River delta	URBAN	KINH	No	Married	High school	Having paid work	YES
168466	1	1	1	2	1	90	59	0.9161	FEMALE	Red River delta	URBAN	KINH	No	Married	High school	Student/retired/Having unpaid work	YES
168467	1	1	1	1	1	70	37	1	FEMALE	Red River delta	RURAL	KINH	No	Married	Primary school and lower	Having paid work	NO
168468	1	1	1	2	1	70	40	0.9161	FEMALE	Red River delta	RURAL	KINH	No	Married	Secondary school	Having paid work	NO
168469	1	1	1	1	1	80	29	1	MALE	Red River delta	RURAL	KINH	No	Divorce/widow/separate/other	High school	Having paid work	YES
168470	1	1	1	1	1	70	28	1	MALE	Red River delta	RURAL	KINH	No	Divorce/widow/separate/other	High school	Having paid work	YES
168471	1	1	1	2	1	80	53	0.9161	FEMALE	Red River delta	RURAL	KINH	No	Married	Secondary school	Having paid work	YES
168472	1	1	1	1	1	90	60	1	MALE	Red River delta	RURAL	KINH	No	Married	Secondary school	Having paid work	YES
168473	2	1	1	2	1	90	54	0.8469	FEMALE	Red River delta	RURAL	KINH	No	Married	Secondary school	Student/retired/Having unpaid work	NO
168475	1	1	1	1	1	70	49	1	FEMALE	Red River delta	URBAN	KINH	No	Married	High school	Having paid work	YES
168476	1	1	1	1	1	50	59	1	MALE	Red River delta	URBAN	KINH	No	Married	Secondary school	Student/retired/Having unpaid work	YES
168477	1	1	1	2	4	60	43	0.7448	FEMALE	Red River delta	URBAN	KINH	No	Single	Primary school and lower	Student/retired/Having unpaid work	NO
168478	1	1	1	1	1	90	41	1	FEMALE	Red River delta	URBAN	KINH	No	Married	Secondary school	Having paid work	YES
168479	1	1	1	2	1	80	32	0.9161	MALE	Red River delta	URBAN	KINH	No	Married	Secondary school	Having paid work	NO
168480	1	1	1	1	1	80	21	1	MALE	Red River delta	URBAN	KINH	No	Single	High school	Student/retired/Having unpaid work	YES
168481	1	1	1	1	1	100	35	1	MALE	Red River delta	URBAN	KINH	No	Married	Higher	Having paid work	YES
168482	1	1	1	1	1	95	34	1	MALE	Red River delta	URBAN	KINH	No	Married	Higher	Having paid work	YES
168483	1	1	1	1	1	90	25	1	MALE	Red River delta	URBAN	KINH	No	Single	Higher	Having paid work	YES
168484	1	1	1	3	1	70	72	0.8479	MALE	Red River delta	RURAL	KINH	No	Married	Secondary school	Unable to work/ Unemployed	YES
168485	1	1	1	1	1	100	47	1	FEMALE	Red River delta	RURAL	KINH	No	Married	Secondary school	Student/retired/Having unpaid work	NO
168486	1	1	1	2	1	70	50	0.9161	FEMALE	Red River delta	RURAL	KINH	No	Married	Secondary school	Having paid work	YES
168487	1	1	1	1	1	80	60	1	MALE	Red River delta	RURAL	KINH	No	Married	Secondary school	Having paid work	YES
168488	1	1	1	1	1	90	42	1	MALE	Red River delta	RURAL	KINH	No	Married	High school	Having paid work	YES
168489	1	1	2	1	1	90	38	0.9536	FEMALE	Red River delta	RURAL	KINH	No	Married	High school	Having paid work	YES
168490	1	1	1	2	1	90	40	0.9161	FEMALE	Red River delta	RURAL	KINH	No	Married	Secondary school	Having paid work	YES
168491	1	1	1	1	1	80	20	1	FEMALE	Red River delta	RURAL	KINH	No	Married	High school	Student/retired/Having unpaid work	YES
168492	1	1	1	1	2	80	33	0.9362	FEMALE	Red River delta	RURAL	KINH	No	Married	Higher	Having paid work	NO
168493	2	1	3	2	1	80	40	0.7882	FEMALE	Red River delta	RURAL	KINH	No	Married	Secondary school	Having paid work	YES
168496	1	1	1	1	3	80	67	0.8874	FEMALE	Red River delta	URBAN	KINH	Yes	Divorce/widow/separate/other	High school	Student/retired/Having unpaid work	YES
168497	2	1	2	2	1	70	48	0.8005	FEMALE	Red River delta	URBAN	KINH	Yes	Married	High school	Having paid work	YES
168498	2	1	1	2	2	50	48	0.7831	MALE	Red River delta	URBAN	KINH	No	Married	High school	Having paid work	NO
168499	1	1	1	2	2	80	58	0.8523	FEMALE	Red River delta	URBAN	KINH	No	Married	High school	Student/retired/Having unpaid work	YES
168500	1	1	1	1	1	80	25	1	FEMALE	Red River delta	URBAN	KINH	No	Married	Higher	Having paid work	YES
168501	1	1	1	1	1	80	20	1	FEMALE	Red River delta	URBAN	KINH	No	Single	High school	Student/retired/Having unpaid work	YES
168506	1	1	1	1	1	80	44	1	MALE	Red River delta	URBAN	KINH	Yes	Married	High school	Having paid work	YES
168507	1	1	1	1	1	100	35	1	FEMALE	Red River delta	URBAN	KINH	No	Married	Secondary school	Having paid work	NO
168508	1	1	1	1	2	80	30	0.9362	FEMALE	Red River delta	URBAN	OTHER_MINORITY_GROUP_SPECIFY	No	Married	Secondary school	Having paid work	YES
168509	2	1	1	1	1	70	32	0.9308	FEMALE	Red River delta	URBAN	KINH	No	Married	Higher	Having paid work	YES
168510	1	1	1	1	1	80	60	1	MALE	Red River delta	RURAL	KINH	No	Married	Secondary school	Unable to work/ Unemployed	NO
168511	1	1	1	1	1	70	30	1	MALE	Red River delta	URBAN	KINH	No	Single	Higher	Having paid work	NO
168512	1	1	1	1	1	100	33	1	FEMALE	Red River delta	RURAL	KINH	No	Married	Primary school and lower	Having paid work	NO
168513	1	1	1	1	1	95	65	1	FEMALE	Red River delta	URBAN	KINH	Yes	Married	Higher	Student/retired/Having unpaid work	YES
168514	1	1	1	1	1	80	41	1	FEMALE	Red River delta	RURAL	KINH	No	Married	Secondary school	Having paid work	NO
168515	1	1	1	1	2	90	19	0.9362	FEMALE	Red River delta	URBAN	KINH	No	Single	High school	Student/retired/Having unpaid work	YES
168516	1	1	1	1	1	80	32	1	FEMALE	Red River delta	RURAL	KINH	No	Married	Higher	Having paid work	YES
168517	1	1	1	1	1	90	20	1	MALE	Red River delta	URBAN	KINH	No	Single	High school	Student/retired/Having unpaid work	YES
168518	1	1	1	1	1	80	19	1	FEMALE	Red River delta	RURAL	KINH	Yes	Single	High school	Student/retired/Having unpaid work	YES
168519	1	1	1	1	1	100	56	1	FEMALE	Red River delta	URBAN	KINH	No	Divorce/widow/separate/other	Secondary school	Student/retired/Having unpaid work	YES
168521	2	1	1	2	1	80	60	0.8469	MALE	Red River delta	RURAL	KINH	No	Married	Secondary school	Unable to work/ Unemployed	YES
168522	1	1	1	1	1	95	39	1	MALE	Red River delta	URBAN	KINH	No	Married	Higher	Having paid work	YES
168523	2	1	1	2	1	70	55	0.8469	FEMALE	Red River delta	URBAN	KINH	No	Divorce/widow/separate/other	High school	Student/retired/Having unpaid work	NO
168524	1	1	1	2	1	70	74	0.9161	FEMALE	Red River delta	RURAL	KINH	No	Married	Primary school and lower	Unable to work/ Unemployed	YES
168525	1	1	1	1	1	80	21	1	FEMALE	Red River delta	URBAN	KINH	No	Single	High school	Student/retired/Having unpaid work	YES
168526	1	1	2	2	3	70	24	0.7571	FEMALE	Red River delta	URBAN	KINH	No	Married	High school	Student/retired/Having unpaid work	YES
168527	1	1	1	1	1	90	65	1	MALE	Red River delta	URBAN	KINH	No	Married	Higher	Student/retired/Having unpaid work	YES
168528	1	1	2	1	3	70	21	0.841	FEMALE	Red River delta	URBAN	KINH	No	Single	High school	Student/retired/Having unpaid work	YES
168529	1	1	1	2	1	80	20	0.9161	MALE	Red River delta	RURAL	KINH	No	Single	Secondary school	Having paid work	YES
168530	1	1	1	1	1	80	38	1	FEMALE	Red River delta	URBAN	KINH	Yes	Divorce/widow/separate/other	Secondary school	Having paid work	NO
168531	1	1	1	1	1	90	24	1	MALE	Red River delta	RURAL	KINH	No	Single	Higher	Having paid work	NO
168532	2	1	1	2	1	95	68	0.8469	MALE	Red River delta	URBAN	KINH	No	Married	Secondary school	Student/retired/Having unpaid work	YES
168533	1	1	1	2	1	90	58	0.9161	FEMALE	Red River delta	RURAL	KINH	No	Married	Primary school and lower	Student/retired/Having unpaid work	NO
168534	1	1	1	1	1	80	52	1	MALE	Red River delta	URBAN	KINH	No	Divorce/widow/separate/other	Secondary school	Having paid work	YES
168535	1	1	1	1	2	80	23	0.9362	FEMALE	Red River delta	RURAL	KINH	No	Married	Higher	Student/retired/Having unpaid work	NO
168537	1	1	1	1	2	80	22	0.9362	FEMALE	Red River delta	RURAL	KINH	No	Single	Higher	Having paid work	NO
168539	2	1	2	2	1	70	40	0.8005	MALE	Red River delta	RURAL	KINH	No	Married	Higher	Having paid work	YES
168541	1	1	1	1	1	75	34	1	FEMALE	Red River delta	RURAL	KINH	No	Married	High school	Having paid work	YES
168542	1	1	1	1	1	100	28	1	MALE	Red River delta	URBAN	KINH	No	Married	Higher	Having paid work	YES
168543	1	1	1	1	1	80	44	1	FEMALE	Red River delta	RURAL	KINH	No	Married	Secondary school	Having paid work	YES
168544	1	1	1	1	2	80	22	0.9362	MALE	Red River delta	URBAN	KINH	No	Single	High school	Student/retired/Having unpaid work	YES
168545	1	1	1	1	1	70	25	1	MALE	Red River delta	RURAL	KINH	No	Single	Higher	Having paid work	YES
168546	2	1	2	2	1	60	33	0.8005	MALE	Red River delta	URBAN	KINH	No	Married	Higher	Having paid work	YES
168547	1	1	1	1	1	70	59	1	FEMALE	Red River delta	URBAN	KINH	No	Married	High school	Student/retired/Having unpaid work	YES
168548	1	1	1	1	1	90	29	1	MALE	Red River delta	RURAL	KINH	No	Married	Higher	Having paid work	YES
168550	1	1	1	1	1	80	37	1	FEMALE	Red River delta	RURAL	KINH	No	Married	Primary school and lower	Having paid work	NO
168552	1	1	1	1	1	90	31	1	MALE	Red River delta	RURAL	KINH	No	Married	High school	Having paid work	YES
168553	1	1	1	2	2	80	53	0.8523	FEMALE	Red River delta	RURAL	KINH	No	Divorce/widow/separate/other	Secondary school	Having paid work	NO
168565	1	1	1	1	2	85	50	0.9362	MALE	Red River delta	RURAL	KINH	No	Married	Secondary school	Having paid work	YES
168566	1	1	1	1	1	90	54	1	FEMALE	Red River delta	RURAL	KINH	No	Married	Secondary school	Having paid work	NO
168567	1	1	1	1	1	95	50	1	FEMALE	Red River delta	URBAN	KINH	No	Married	Secondary school	Having paid work	NO
168568	1	1	2	2	1	90	28	0.8697	FEMALE	Red River delta	RURAL	KINH	No	Married	Higher	Having paid work	YES
168569	1	1	1	1	1	100	39	1	MALE	Red River delta	RURAL	KINH	No	Married	Higher	Having paid work	YES
168570	1	1	1	1	1	90	39	1	MALE	Red River delta	RURAL	KINH	No	Married	Higher	Having paid work	YES
168571	1	1	1	2	1	90	48	0.9161	FEMALE	Red River delta	RURAL	KINH	No	Married	Secondary school	Having paid work	YES
168572	1	1	1	1	2	100	32	0.9362	MALE	Red River delta	RURAL	KINH	No	Married	Higher	Having paid work	YES
168573	1	1	1	1	1	90	26	1	FEMALE	Red River delta	RURAL	KINH	No	Married	Higher	Having paid work	YES
168575	1	1	1	1	1	90	43	1	FEMALE	Red River delta	URBAN	KINH	No	Married	Secondary school	Student/retired/Having unpaid work	YES
168576	2	1	2	3	2	50	70	0.6685	FEMALE	Red River delta	URBAN	KINH	No	Married	High school	Student/retired/Having unpaid work	YES
168577	1	1	1	1	1	80	25	1	FEMALE	Red River delta	URBAN	KINH	No	Married	Higher	Having paid work	NO
168578	1	1	1	2	1	90	24	0.9161	MALE	Red River delta	URBAN	KINH	No	Single	Higher	Having paid work	YES
168579	1	1	1	1	1	100	38	1	FEMALE	Red River delta	URBAN	KINH	No	Married	Secondary school	Student/retired/Having unpaid work	NO
168580	1	1	1	1	1	100	50	1	MALE	Red River delta	URBAN	KINH	No	Married	High school	Having paid work	NO
168581	1	1	1	2	1	79	45	0.9161	FEMALE	Red River delta	URBAN	KINH	No	Married	High school	Having paid work	NO
168582	1	1	1	3	1	90	26	0.8479	MALE	Red River delta	URBAN	KINH	No	Married	Higher	Having paid work	YES
168583	1	1	1	3	1	100	27	0.8479	MALE	Red River delta	URBAN	KINH	Yes	Single	Higher	Having paid work	NO
168584	1	1	1	1	1	80	27	1	MALE	Red River delta	RURAL	KINH	No	Married	Secondary school	Having paid work	NO
168585	1	1	1	1	1	80	29	1	FEMALE	Red River delta	RURAL	KINH	No	Married	High school	Having paid work	YES
168586	1	1	1	1	1	79	34	1	FEMALE	Red River delta	RURAL	KINH	No	Married	Higher	Having paid work	NO
168587	1	1	1	1	1	70	29	1	MALE	Red River delta	RURAL	KINH	No	Married	Secondary school	Having paid work	NO
168588	1	1	1	1	1	50	60	1	MALE	Red River delta	RURAL	KINH	No	Married	Primary school and lower	Having paid work	NO
168589	1	1	1	2	1	90	30	0.9161	FEMALE	Red River delta	RURAL	KINH	No	Married	High school	Having paid work	YES
168590	1	1	1	1	1	90	25	1	FEMALE	Red River delta	RURAL	KINH	No	Married	High school	Having paid work	NO
168591	1	1	1	1	1	81	53	1	FEMALE	Red River delta	RURAL	KINH	No	Married	Secondary school	Having paid work	YES
168592	1	1	2	2	1	60	49	0.8697	MALE	Red River delta	RURAL	KINH	No	Married	Higher	Having paid work	YES
168593	1	1	1	2	1	90	50	0.9161	MALE	Red River delta	RURAL	KINH	No	Married	Secondary school	Having paid work	YES
168594	2	1	1	2	1	80	64	0.8469	FEMALE	Red River delta	RURAL	KINH	No	Married	Primary school and lower	Student/retired/Having unpaid work	YES
168599	1	1	1	1	1	70	33	1	FEMALE	Red River delta	RURAL	KINH	No	Married	Higher	Having paid work	YES
168600	1	1	1	1	1	100	41	1	MALE	Red River delta	RURAL	KINH	No	Married	Secondary school	Having paid work	YES
168607	1	1	1	2	1	70	52	0.9161	FEMALE	Red River delta	RURAL	KINH	No	Married	Secondary school	Having paid work	NO
168608	1	1	1	1	1	80	22	1	FEMALE	Red River delta	RURAL	KINH	No	Married	Higher	Having paid work	YES
168609	1	1	1	2	1	80	51	0.9161	FEMALE	Red River delta	RURAL	KINH	No	Married	Secondary school	Having paid work	YES
168610	1	1	1	1	2	90	35	0.9362	MALE	Red River delta	RURAL	KINH	No	Married	Secondary school	Having paid work	YES
168611	1	1	1	1	1	71	26	1	MALE	Red River delta	RURAL	KINH	No	Married	Higher	Having paid work	YES
168612	1	1	1	1	1	90	20	1	FEMALE	Red River delta	RURAL	KINH	No	Married	Secondary school	Student/retired/Having unpaid work	NO
168614	1	1	1	1	1	95	24	1	FEMALE	Red River delta	RURAL	KINH	No	Married	Secondary school	Student/retired/Having unpaid work	NO
168664	1	1	1	1	1	90	44	1	FEMALE	Red River delta	RURAL	KINH	No	Married	Secondary school	Having paid work	NO
168665	1	1	1	1	1	80	32	1	MALE	Red River delta	RURAL	KINH	No	Married	Secondary school	Having paid work	NO
168666	1	1	1	1	1	80	23	1	MALE	Red River delta	RURAL	KINH	No	Single	High school	Having paid work	YES
168667	1	1	1	2	1	90	68	0.9161	FEMALE	Red River delta	RURAL	KINH	No	Married	Primary school and lower	Having paid work	YES
168668	1	1	1	2	1	80	24	0.9161	FEMALE	Red River delta	RURAL	KINH	No	Married	Higher	Having paid work	YES
168677	1	1	1	2	2	70	32	0.8523	MALE	Red River delta	RURAL	KINH	No	Married	Higher	Having paid work	YES
168678	1	1	1	2	1	70	58	0.9161	MALE	Red River delta	RURAL	KINH	No	Married	Secondary school	Having paid work	YES
168679	1	1	2	1	3	70	26	0.841	MALE	Red River delta	RURAL	KINH	No	Single	High school	Having paid work	NO
168680	1	1	1	2	1	55	53	0.9161	FEMALE	Red River delta	RURAL	KINH	Yes	Married	Secondary school	Student/retired/Having unpaid work	NO
168681	1	1	1	1	2	50	36	0.9362	FEMALE	Red River delta	RURAL	KINH	No	Married	Secondary school	Having paid work	YES
168682	1	1	1	2	1	80	22	0.9161	MALE	Red River delta	RURAL	KINH	No	Single	Secondary school	Having paid work	NO
168683	1	1	1	1	2	95	43	0.9362	MALE	Red River delta	RURAL	KINH	No	Married	High school	Having paid work	NO
168685	1	1	1	1	1	95	48	1	MALE	Red River delta	RURAL	KINH	No	Married	High school	Having paid work	YES
168686	1	1	1	2	1	80	67	0.9161	FEMALE	Red River delta	RURAL	KINH	No	Married	Primary school and lower	Having paid work	YES
168687	1	1	1	2	1	88	43	0.9161	MALE	Red River delta	RURAL	KINH	No	Married	Secondary school	Having paid work	YES
168688	2	2	2	2	1	70	56	0.7577	FEMALE	Red River delta	RURAL	KINH	No	Married	Secondary school	Having paid work	YES
168689	1	1	1	1	4	90	32	0.8287	FEMALE	Red River delta	RURAL	KINH	No	Married	Higher	Having paid work	YES
168710	2	1	1	1	1	90	28	0.9308	MALE	Red River delta	RURAL	KINH	No	Married	High school	Having paid work	YES
168711	1	1	1	1	1	100	35	1	FEMALE	Red River delta	RURAL	KINH	No	Married	Secondary school	Having paid work	NO
168729	1	1	1	1	2	70	23	0.9362	MALE	Red River delta	RURAL	KINH	No	Single	Higher	Having paid work	NO
168730	1	1	1	1	1	90	33	1	FEMALE	Red River delta	RURAL	KINH	No	Married	Secondary school	Having paid work	YES
168731	1	1	1	1	1	80	24	1	MALE	Red River delta	RURAL	KINH	Yes	Married	Higher	Having paid work	NO
168732	1	1	1	1	1	90	60	1	FEMALE	Red River delta	RURAL	KINH	No	Married	Secondary school	Having paid work	YES
168733	1	1	1	1	1	70	36	1	MALE	Red River delta	RURAL	KINH	Yes	Married	Secondary school	Having paid work	NO
168734	2	1	1	2	2	60	60	0.7831	FEMALE	Red River delta	RURAL	KINH	No	Divorce/widow/separate/other	Primary school and lower	Student/retired/Having unpaid work	YES
168735	1	1	1	1	1	80	19	1	MALE	Red River delta	RURAL	KINH	No	Single	High school	Student/retired/Having unpaid work	YES
168736	1	1	1	2	1	60	44	0.9161	MALE	Red River delta	RURAL	KINH	No	Married	Primary school and lower	Having paid work	NO
168780	1	1	1	1	1	80	28	1	MALE	Red River delta	RURAL	KINH	No	Single	High school	Having paid work	NO
168804	1	1	1	1	1	90	38	1	MALE	Red River delta	RURAL	KINH	No	Married	Primary school and lower	Having paid work	YES
168805	1	1	1	2	2	70	74	0.8523	FEMALE	Red River delta	RURAL	KINH	No	Married	Primary school and lower	Having paid work	YES
168806	1	1	1	1	1	60	50	1	FEMALE	Red River delta	RURAL	KINH	No	Married	High school	Having paid work	NO
168807	1	1	1	1	1	80	27	1	FEMALE	Red River delta	RURAL	KINH	No	Married	Higher	Having paid work	YES
168808	1	1	1	2	2	80	25	0.8523	MALE	Red River delta	RURAL	KINH	No	Single	Higher	Having paid work	NO
168809	1	1	1	1	1	90	40	1	MALE	Red River delta	RURAL	KINH	Yes	Married	Higher	Having paid work	YES
168810	1	1	1	1	1	80	32	1	FEMALE	Red River delta	RURAL	KINH	No	Married	Higher	Having paid work	YES
168811	2	1	1	2	1	100	54	0.8469	FEMALE	Red River delta	RURAL	KINH	No	Married	Secondary school	Student/retired/Having unpaid work	YES
168812	1	1	1	1	1	90	42	1	FEMALE	Red River delta	RURAL	KINH	No	Married	Secondary school	Having paid work	YES
168813	1	1	1	1	1	90	41	1	FEMALE	Red River delta	RURAL	KINH	No	Married	Higher	Having paid work	YES
168814	1	1	1	2	1	80	30	0.9161	FEMALE	Red River delta	RURAL	KINH	No	Married	High school	Having paid work	NO
168815	1	1	1	1	1	95	43	1	MALE	Red River delta	RURAL	KINH	No	Married	Higher	Having paid work	NO
168816	1	1	1	1	1	90	61	1	FEMALE	Red River delta	RURAL	KINH	No	Divorce/widow/separate/other	Higher	Student/retired/Having unpaid work	YES
168817	1	1	1	1	1	98	44	1	MALE	Red River delta	RURAL	KINH	No	Married	Higher	Having paid work	YES
168818	1	1	1	2	1	85	21	0.9161	FEMALE	Red River delta	RURAL	KINH	No	Single	Higher	Having paid work	YES
168819	1	1	1	1	1	80	55	1	MALE	Red River delta	RURAL	KINH	No	Married	Secondary school	Having paid work	YES
168820	1	1	1	1	1	97	31	1	MALE	Red River delta	RURAL	KINH	No	Married	High school	Having paid work	YES
168821	1	1	1	1	1	100	56	1	MALE	Red River delta	RURAL	KINH	No	Married	Secondary school	Having paid work	YES
168822	1	1	1	1	1	80	53	1	MALE	Red River delta	RURAL	KINH	No	Married	Secondary school	Having paid work	YES
168824	2	1	2	3	2	50	66	0.6685	FEMALE	Red River delta	RURAL	KINH	No	Married	Primary school and lower	Student/retired/Having unpaid work	YES
168825	2	1	1	2	2	70	32	0.7831	MALE	Red River delta	RURAL	KINH	No	Married	Secondary school	Having paid work	YES
168826	2	1	1	2	1	70	73	0.8469	FEMALE	Red River delta	RURAL	KINH	No	Divorce/widow/separate/other	Primary school and lower	Student/retired/Having unpaid work	YES
168827	1	1	1	1	1	70	27	1	MALE	Red River delta	RURAL	KINH	No	Married	Higher	Having paid work	YES
168828	1	1	1	1	1	80	40	1	MALE	Red River delta	RURAL	KINH	No	Married	Secondary school	Having paid work	NO
168829	2	1	1	2	1	75	54	0.8469	MALE	Red River delta	RURAL	KINH	No	Married	Secondary school	Having paid work	YES
168830	1	1	1	3	1	90	34	0.8479	FEMALE	Red River delta	URBAN	KINH	No	Married	Higher	Having paid work	YES
168832	1	1	1	1	2	90	32	0.9362	MALE	Northern mountains	URBAN	KINH	No	Married	High school	Having paid work	NO
168833	1	1	1	1	1	86	50	1	FEMALE	Northern mountains	URBAN	KINH	No	Divorce/widow/separate/other	High school	Having paid work	YES
168835	2	1	1	2	1	60	59	0.8469	MALE	Red River delta	RURAL	KINH	No	Married	Secondary school	Having paid work	YES
168837	2	1	2	3	1	80	53	0.7323	MALE	Red River delta	URBAN	KINH	No	Married	Secondary school	Having paid work	YES
168838	1	1	1	2	1	70	29	0.9161	FEMALE	Red River delta	RURAL	KINH	No	Married	Higher	Having paid work	YES
168839	1	1	1	2	1	80	68	0.9161	FEMALE	Red River delta	RURAL	KINH	Yes	Divorce/widow/separate/other	Secondary school	Student/retired/Having unpaid work	YES
168840	2	1	1	2	1	95	25	0.8469	MALE	Red River delta	RURAL	KINH	No	Married	Higher	Having paid work	YES
168841	1	1	1	1	1	90	42	1	MALE	Red River delta	RURAL	KINH	Yes	Married	High school	Having paid work	YES
168842	1	1	1	1	1	90	49	1	MALE	Red River delta	RURAL	KINH	Yes	Married	Secondary school	Having paid work	YES
168843	1	1	1	1	1	80	69	1	FEMALE	Northern mountains	URBAN	KINH	No	Married	Higher	Student/retired/Having unpaid work	YES
168844	1	1	1	2	1	80	53	0.9161	FEMALE	Northern mountains	URBAN	KINH	No	Married	Higher	Student/retired/Having unpaid work	YES
168846	1	1	1	2	1	90	43	0.9161	MALE	Red River delta	RURAL	KINH	No	Married	Higher	Having paid work	YES
168847	1	1	1	1	1	100	34	1	MALE	Red River delta	URBAN	KINH	No	Married	Primary school and lower	Having paid work	NO
168848	1	1	1	1	1	90	23	1	FEMALE	Red River delta	RURAL	KINH	No	Married	Secondary school	Having paid work	NO
168849	1	1	1	1	1	90	29	1	FEMALE	Red River delta	RURAL	KINH	No	Married	Secondary school	Having paid work	YES
168850	1	1	1	1	1	90	56	1	MALE	Northern mountains	URBAN	OTHER_MINORITY_GROUP_SPECIFY	No	Married	High school	Having paid work	YES
168851	2	1	2	2	2	40	56	0.7367	MALE	Red River delta	RURAL	KINH	Yes	Married	Secondary school	Having paid work	YES
168852	1	1	1	1	1	80	30	1	MALE	Red River delta	RURAL	KINH	No	Married	Higher	Having paid work	YES
168853	1	1	1	1	1	70	29	1	FEMALE	Red River delta	RURAL	KINH	No	Married	Higher	Having paid work	NO
168855	1	1	1	1	1	90	21	1	FEMALE	Red River delta	RURAL	KINH	No	Single	High school	Student/retired/Having unpaid work	YES
168860	1	1	1	2	1	80	48	0.9161	FEMALE	Northern mountains	URBAN	OTHER_MINORITY_GROUP_SPECIFY	No	Married	High school	Having paid work	YES
168861	1	1	1	3	2	60	35	0.7841	FEMALE	Northern mountains	URBAN	OTHER_MINORITY_GROUP_SPECIFY	No	Married	High school	Having paid work	YES
168863	1	2	2	2	1	70	27	0.8269	MALE	Red River delta	RURAL	KINH	No	Married	High school	Having paid work	YES
168864	1	1	2	2	2	70	57	0.8059	MALE	Red River delta	RURAL	KINH	No	Married	Secondary school	Having paid work	YES
168865	1	1	1	2	2	70	23	0.8523	MALE	Red River delta	RURAL	KINH	No	Single	Secondary school	Having paid work	NO
168866	1	1	1	1	1	80	25	1	MALE	Northern mountains	URBAN	KINH	No	Single	High school	Having paid work	YES
168867	1	1	1	1	1	80	54	1	FEMALE	Red River delta	URBAN	KINH	No	Married	Primary school and lower	Student/retired/Having unpaid work	NO
168868	1	1	1	1	1	90	66	1	FEMALE	Red River delta	RURAL	KINH	No	Married	Primary school and lower	Student/retired/Having unpaid work	YES
168870	1	1	1	1	1	90	25	1	FEMALE	Red River delta	RURAL	KINH	No	Married	High school	Having paid work	NO
168871	2	1	1	2	1	80	61	0.8469	MALE	Red River delta	RURAL	KINH	No	Married	Secondary school	Having paid work	YES
168872	1	1	1	2	1	95	27	0.9161	FEMALE	Red River delta	RURAL	KINH	No	Married	Higher	Having paid work	YES
168874	1	1	1	1	1	80	33	1	FEMALE	Red River delta	RURAL	KINH	No	Married	High school	Having paid work	NO
168875	1	1	1	1	2	80	24	0.9362	MALE	Red River delta	RURAL	KINH	No	Single	High school	Having paid work	NO
168876	1	1	1	1	1	90	50	1	FEMALE	Red River delta	RURAL	KINH	No	Married	Higher	Having paid work	YES
168877	1	1	1	1	2	90	35	0.9362	FEMALE	Red River delta	RURAL	KINH	Yes	Married	Secondary school	Having paid work	YES
168878	1	1	1	1	1	80	50	1	FEMALE	Red River delta	RURAL	KINH	Yes	Married	Secondary school	Having paid work	YES
168879	1	1	1	1	1	85	31	1	FEMALE	Red River delta	RURAL	KINH	Yes	Married	Primary school and lower	Having paid work	NO
168880	1	1	1	1	1	90	22	1	MALE	Red River delta	RURAL	KINH	No	Married	Secondary school	Having paid work	NO
168881	1	1	1	1	1	100	23	1	MALE	Red River delta	RURAL	KINH	No	Married	Secondary school	Having paid work	YES
168882	1	1	1	1	1	80	28	1	FEMALE	Red River delta	RURAL	KINH	No	Married	Secondary school	Having paid work	YES
168883	1	1	1	1	1	90	26	1	FEMALE	Red River delta	RURAL	KINH	No	Married	Higher	Having paid work	YES
168884	1	1	1	1	1	95	29	1	FEMALE	Red River delta	RURAL	KINH	No	Married	Secondary school	Having paid work	NO
168885	1	1	1	1	1	90	23	1	MALE	Red River delta	RURAL	KINH	No	Married	High school	Having paid work	YES
168886	1	1	1	1	1	100	35	1	MALE	Red River delta	RURAL	KINH	No	Married	Secondary school	Having paid work	YES
168911	1	1	1	1	1	80	22	1	MALE	Northern mountains	URBAN	KINH	No	Single	High school	Having paid work	YES
168912	2	2	1	4	1	70	54	0.618	FEMALE	Northern mountains	RURAL	OTHER_MINORITY_GROUP_SPECIFY	No	Married	High school	Having paid work	YES
168913	4	3	3	4	2	50	43	0.3551	MALE	Northern mountains	RURAL	OTHER_MINORITY_GROUP_SPECIFY	No	Married	Primary school and lower	Having paid work	YES
168914	1	1	1	1	1	90	34	1	MALE	Northern mountains	RURAL	KINH	Yes	Divorce/widow/separate/other	Secondary school	Having paid work	YES
168915	1	1	1	1	1	90	27	1	FEMALE	Red River delta	RURAL	KINH	No	Married	Higher	Having paid work	YES
168916	1	1	1	1	1	80	23	1	FEMALE	Red River delta	RURAL	KINH	No	Married	Secondary school	Student/retired/Having unpaid work	YES
168917	1	1	1	1	1	70	32	1	FEMALE	Red River delta	RURAL	KINH	No	Married	Secondary school	Having paid work	YES
168918	1	1	1	1	1	35	61	1	FEMALE	Northern mountains	URBAN	KINH	No	Married	Secondary school	Student/retired/Having unpaid work	YES
168921	1	1	1	3	1	70	25	0.8479	FEMALE	Northern mountains	URBAN	KINH	No	Married	Higher	Having paid work	YES
168922	2	2	2	2	2	50	64	0.6939	FEMALE	Northern mountains	RURAL	OTHER_MINORITY_GROUP_SPECIFY	No	Married	Higher	Student/retired/Having unpaid work	YES
168926	1	1	1	1	1	85	37	1	FEMALE	Northern mountains	URBAN	OTHER_MINORITY_GROUP_SPECIFY	No	Married	High school	Having paid work	YES
168927	2	1	1	2	1	90	60	0.8469	FEMALE	Northern mountains	URBAN	OTHER_MINORITY_GROUP_SPECIFY	No	Divorce/widow/separate/other	Higher	Student/retired/Having unpaid work	YES
168928	1	1	1	2	1	90	33	0.9161	FEMALE	Northern mountains	URBAN	KINH	No	Married	Higher	Student/retired/Having unpaid work	YES
168939	1	1	1	2	2	75	69	0.8523	FEMALE	Northern mountains	RURAL	OTHER_MINORITY_GROUP_SPECIFY	No	Divorce/widow/separate/other	Secondary school	Student/retired/Having unpaid work	YES
168940	1	1	1	2	2	70	27	0.8523	FEMALE	Northern mountains	RURAL	OTHER_MINORITY_GROUP_SPECIFY	No	Married	Secondary school	Having paid work	YES
168941	1	1	1	1	2	90	23	0.9362	FEMALE	Northern mountains	RURAL	OTHER_MINORITY_GROUP_SPECIFY	No	Married	High school	Having paid work	NO
168942	1	1	1	1	1	95	27	1	MALE	Northern mountains	RURAL	OTHER_MINORITY_GROUP_SPECIFY	No	Married	Higher	Having paid work	YES
168943	1	1	1	1	1	90	23	1	FEMALE	Northern mountains	RURAL	OTHER_MINORITY_GROUP_SPECIFY	No	Married	High school	Having paid work	YES
168944	1	1	1	1	1	90	45	1	FEMALE	Northern mountains	URBAN	KINH	No	Married	High school	Having paid work	NO
168945	1	1	1	1	1	80	37	1	FEMALE	Northern mountains	URBAN	KINH	No	Married	High school	Having paid work	YES
168946	1	1	1	1	1	85	45	1	FEMALE	Northern mountains	RURAL	KINH	No	Married	Secondary school	Having paid work	YES
168947	1	1	1	1	1	80	30	1	FEMALE	Northern mountains	RURAL	OTHER_MINORITY_GROUP_SPECIFY	No	Married	Higher	Having paid work	YES
168948	1	1	1	1	1	90	22	1	FEMALE	Northern mountains	URBAN	OTHER_MINORITY_GROUP_SPECIFY	No	Single	Higher	Having paid work	NO
168949	1	1	1	1	1	100	67	1	FEMALE	Northern mountains	RURAL	OTHER_MINORITY_GROUP_SPECIFY	No	Divorce/widow/separate/other	Primary school and lower	Student/retired/Having unpaid work	YES
168950	1	1	1	1	1	80	35	1	FEMALE	Northern mountains	RURAL	OTHER_MINORITY_GROUP_SPECIFY	No	Married	Secondary school	Having paid work	YES
168952	1	1	1	1	1	70	37	1	FEMALE	Northern mountains	RURAL	KINH	Yes	Married	Secondary school	Having paid work	NO
168954	1	1	1	1	1	85	28	1	MALE	Red River delta	RURAL	KINH	No	Married	Higher	Having paid work	YES
168955	1	1	1	1	1	90	56	1	MALE	Red River delta	RURAL	KINH	No	Married	Secondary school	Having paid work	NO
168956	1	1	1	1	1	90	21	1	MALE	Red River delta	RURAL	KINH	No	Single	High school	Having paid work	YES
168957	1	1	1	1	1	80	68	1	FEMALE	Northern mountains	RURAL	OTHER_MINORITY_GROUP_SPECIFY	No	Married	Secondary school	Student/retired/Having unpaid work	YES
168958	1	1	1	2	1	80	46	0.9161	MALE	Northern mountains	RURAL	OTHER_MINORITY_GROUP_SPECIFY	No	Married	Secondary school	Having paid work	YES
168959	1	1	1	1	1	100	61	1	MALE	Red River delta	RURAL	KINH	Yes	Married	Secondary school	Having paid work	YES
168961	1	1	1	2	1	70	80	0.9161	MALE	Red River delta	URBAN	KINH	No	Married	High school	Student/retired/Having unpaid work	YES
168962	1	1	2	2	2	90	44	0.8059	MALE	Northern mountains	URBAN	KINH	No	Married	Higher	Having paid work	YES
168963	1	1	1	2	1	70	27	0.9161	FEMALE	Northern mountains	RURAL	OTHER_MINORITY_GROUP_SPECIFY	No	Married	High school	Having paid work	YES
168964	2	3	2	3	3	50	39	0.5737	FEMALE	Northern mountains	URBAN	KINH	No	Married	Secondary school	Having paid work	NO
168999	1	1	1	2	1	90	30	0.9161	FEMALE	Northern mountains	RURAL	OTHER_MINORITY_GROUP_SPECIFY	No	Married	High school	Having paid work	YES
169000	1	1	1	2	1	90	30	0.9161	MALE	Northern mountains	RURAL	KINH	No	Married	Secondary school	Having paid work	YES
169001	1	1	1	2	2	60	73	0.8523	FEMALE	Northern mountains	RURAL	OTHER_MINORITY_GROUP_SPECIFY	No	Divorce/widow/separate/other	High school	Student/retired/Having unpaid work	YES
169002	1	1	1	2	2	80	19	0.8523	FEMALE	Northern mountains	RURAL	OTHER_MINORITY_GROUP_SPECIFY	No	Married	Secondary school	Student/retired/Having unpaid work	YES
169003	1	1	1	1	1	90	19	1	FEMALE	Northern mountains	RURAL	OTHER_MINORITY_GROUP_SPECIFY	No	Married	Secondary school	Student/retired/Having unpaid work	NO
169005	2	1	1	3	1	70	48	0.7787	FEMALE	Northern mountains	RURAL	OTHER_MINORITY_GROUP_SPECIFY	No	Married	Secondary school	Having paid work	YES
169007	1	1	1	1	1	90	50	1	FEMALE	Northern mountains	RURAL	OTHER_MINORITY_GROUP_SPECIFY	No	Divorce/widow/separate/other	High school	Having paid work	YES
169008	1	1	1	2	1	80	52	0.9161	FEMALE	Northern mountains	RURAL	KINH	No	Married	Secondary school	Having paid work	YES
169010	1	1	1	4	1	40	59	0.73	MALE	Northern mountains	RURAL	KINH	No	Married	Secondary school	Having paid work	YES
169011	1	1	1	3	1	95	61	0.8479	FEMALE	Northern mountains	RURAL	OTHER_MINORITY_GROUP_SPECIFY	No	Divorce/widow/separate/other	Secondary school	Student/retired/Having unpaid work	YES
169014	1	1	1	2	1	90	45	0.9161	FEMALE	Northern mountains	RURAL	OTHER_MINORITY_GROUP_SPECIFY	No	Married	Secondary school	Having paid work	YES
169015	2	1	1	3	3	50	52	0.6661	FEMALE	Northern mountains	RURAL	OTHER_MINORITY_GROUP_SPECIFY	No	Married	Secondary school	Having paid work	NO
169017	1	1	1	1	1	90	35	1	MALE	Northern mountains	RURAL	OTHER_MINORITY_GROUP_SPECIFY	No	Married	Secondary school	Having paid work	NO
169018	1	1	1	3	1	60	52	0.8479	MALE	Northern mountains	RURAL	KINH	No	Married	Secondary school	Having paid work	YES
169020	1	1	2	1	1	50	29	0.9536	MALE	Northern mountains	URBAN	KINH	No	Married	High school	Having paid work	NO
169021	2	1	1	2	1	80	42	0.8469	FEMALE	Northern mountains	URBAN	OTHER_MINORITY_GROUP_SPECIFY	No	Married	Secondary school	Having paid work	NO
169022	2	1	1	2	1	80	53	0.8469	FEMALE	Northern mountains	RURAL	OTHER_MINORITY_GROUP_SPECIFY	No	Divorce/widow/separate/other	Secondary school	Having paid work	YES
169023	2	1	1	2	1	70	27	0.8469	FEMALE	Northern mountains	RURAL	OTHER_MINORITY_GROUP_SPECIFY	No	Married	Secondary school	Student/retired/Having unpaid work	YES
169024	2	1	1	2	1	70	45	0.8469	FEMALE	Northern mountains	RURAL	OTHER_MINORITY_GROUP_SPECIFY	No	Married	Secondary school	Having paid work	YES
169025	1	1	1	1	1	50	27	1	FEMALE	Northern mountains	RURAL	OTHER_MINORITY_GROUP_SPECIFY	No	Married	Primary school and lower	Student/retired/Having unpaid work	YES
169026	1	1	1	1	1	80	29	1	FEMALE	Northern mountains	RURAL	OTHER_MINORITY_GROUP_SPECIFY	No	Married	Secondary school	Having paid work	NO
169027	1	1	1	1	1	90	50	1	MALE	Northern mountains	RURAL	OTHER_MINORITY_GROUP_SPECIFY	No	Married	High school	Having paid work	YES
169028	1	1	1	1	1	80	29	1	FEMALE	Northern mountains	RURAL	KINH	No	Married	Higher	Having paid work	YES
169029	1	1	1	1	2	81	39	0.9362	MALE	Northern mountains	RURAL	KINH	Yes	Single	Primary school and lower	Having paid work	NO
169030	1	1	1	1	1	100	19	1	FEMALE	Northern mountains	RURAL	KINH	No	Single	High school	Student/retired/Having unpaid work	YES
169031	1	1	1	1	1	90	29	1	MALE	Northern mountains	RURAL	KINH	No	Married	High school	Having paid work	YES
169032	1	1	1	1	1	70	41	1	FEMALE	Northern mountains	RURAL	KINH	No	Married	Primary school and lower	Having paid work	YES
169034	1	1	1	1	1	70	59	1	MALE	Red River delta	RURAL	KINH	No	Married	Secondary school	Having paid work	YES
169035	1	1	1	2	1	50	65	0.9161	FEMALE	Northern mountains	URBAN	KINH	No	Married	Secondary school	Student/retired/Having unpaid work	YES
169036	1	1	1	2	1	70	35	0.9161	FEMALE	Northern mountains	URBAN	OTHER_MINORITY_GROUP_SPECIFY	No	Married	Higher	Having paid work	YES
169037	1	1	1	2	2	80	46	0.8523	FEMALE	Northern mountains	RURAL	OTHER_MINORITY_GROUP_SPECIFY	Yes	Married	Primary school and lower	Having paid work	YES
169038	1	1	1	1	1	90	36	1	MALE	Northern mountains	RURAL	OTHER_MINORITY_GROUP_SPECIFY	No	Married	High school	Having paid work	YES
169039	1	1	1	2	1	80	41	0.9161	FEMALE	Northern mountains	RURAL	OTHER_MINORITY_GROUP_SPECIFY	No	Married	Primary school and lower	Having paid work	YES
169040	1	1	1	1	1	80	48	1	MALE	Northern mountains	RURAL	OTHER_MINORITY_GROUP_SPECIFY	No	Married	Primary school and lower	Having paid work	NO
169041	1	1	1	2	2	85	63	0.8523	MALE	Northern mountains	RURAL	KINH	No	Married	Secondary school	Having paid work	YES
169042	1	1	1	1	1	88	27	1	MALE	Northern mountains	RURAL	OTHER_MINORITY_GROUP_SPECIFY	No	Single	Higher	Having paid work	NO
169043	2	1	1	2	1	70	50	0.8469	FEMALE	Northern mountains	RURAL	OTHER_MINORITY_GROUP_SPECIFY	No	Divorce/widow/separate/other	Secondary school	Having paid work	YES
169044	1	1	1	1	1	80	34	1	FEMALE	Northern mountains	RURAL	OTHER_MINORITY_GROUP_SPECIFY	No	Married	Secondary school	Having paid work	YES
169045	1	1	1	1	1	85	62	1	MALE	Northern mountains	RURAL	OTHER_MINORITY_GROUP_SPECIFY	No	Married	High school	Student/retired/Having unpaid work	YES
169100	1	1	1	1	1	90	27	1	FEMALE	Northern mountains	RURAL	KINH	No	Married	High school	Having paid work	NO
169101	1	1	1	1	1	80	45	1	FEMALE	Highlands	URBAN	KINH	Yes	Married	High school	Having paid work	YES
169105	1	1	1	2	1	80	27	0.9161	MALE	Northern mountains	RURAL	KINH	Yes	Single	Secondary school	Having paid work	NO
169107	1	1	1	2	1	70	48	0.9161	MALE	Northern mountains	RURAL	OTHER_MINORITY_GROUP_SPECIFY	No	Married	High school	Having paid work	NO
169108	1	1	1	2	1	80	58	0.9161	MALE	Northern mountains	RURAL	KINH	No	Married	Secondary school	Having paid work	NO
169109	1	1	1	1	1	80	45	1	MALE	Northern mountains	RURAL	OTHER_MINORITY_GROUP_SPECIFY	No	Married	Secondary school	Having paid work	YES
169110	1	1	1	1	1	80	27	1	MALE	Northern mountains	RURAL	OTHER_MINORITY_GROUP_SPECIFY	No	Married	High school	Having paid work	YES
169111	1	1	1	2	1	90	37	0.9161	MALE	Northern mountains	RURAL	KINH	No	Married	Secondary school	Having paid work	YES
169112	1	1	1	2	2	70	51	0.8523	MALE	Northern mountains	URBAN	KINH	No	Married	Higher	Having paid work	YES
169113	1	1	1	1	1	80	34	1	MALE	Northern mountains	URBAN	KINH	No	Married	High school	Having paid work	YES
169114	1	1	1	3	1	70	46	0.8479	FEMALE	Red River delta	RURAL	OTHER_MINORITY_GROUP_SPECIFY	No	Married	Secondary school	Having paid work	YES
169115	1	1	1	2	2	90	42	0.8523	FEMALE	Northern mountains	RURAL	OTHER_MINORITY_GROUP_SPECIFY	No	Married	Higher	Having paid work	YES
169116	1	1	1	1	1	70	67	1	MALE	Red River delta	RURAL	OTHER_MINORITY_GROUP_SPECIFY	No	Married	High school	Unable to work/ Unemployed	YES
169117	1	1	1	2	2	80	53	0.8523	FEMALE	Northern mountains	RURAL	OTHER_MINORITY_GROUP_SPECIFY	No	Divorce/widow/separate/other	Secondary school	Having paid work	YES
169118	1	1	1	1	1	70	24	1	FEMALE	Northern mountains	RURAL	OTHER_MINORITY_GROUP_SPECIFY	No	Married	Higher	Having paid work	YES
169119	2	1	1	1	1	100	43	0.9308	MALE	Northern mountains	RURAL	OTHER_MINORITY_GROUP_SPECIFY	No	Married	High school	Having paid work	YES
169120	2	1	1	2	1	80	40	0.8469	FEMALE	Red River delta	RURAL	OTHER_MINORITY_GROUP_SPECIFY	No	Married	Primary school and lower	Having paid work	YES
169121	1	1	1	1	1	90	40	1	FEMALE	Red River delta	RURAL	KINH	No	Married	Higher	Having paid work	YES
169122	1	1	1	3	1	80	23	0.8479	MALE	Northern mountains	RURAL	OTHER_MINORITY_GROUP_SPECIFY	No	Single	Secondary school	Having paid work	NO
169123	1	1	1	1	1	80	26	1	MALE	Northern mountains	RURAL	KINH	No	Married	High school	Having paid work	YES
169124	1	1	1	2	1	70	30	0.9161	MALE	Northern mountains	RURAL	KINH	No	Divorce/widow/separate/other	Secondary school	Having paid work	NO
169125	1	1	1	1	1	90	31	1	MALE	Northern mountains	RURAL	KINH	No	Single	High school	Having paid work	NO
169126	2	1	1	2	1	70	68	0.8469	FEMALE	Northern mountains	RURAL	OTHER_MINORITY_GROUP_SPECIFY	No	Divorce/widow/separate/other	Primary school and lower	Student/retired/Having unpaid work	NO
169127	1	1	1	2	1	80	44	0.9161	MALE	Northern mountains	RURAL	KINH	No	Married	Secondary school	Having paid work	YES
169128	1	1	1	1	1	90	45	1	MALE	Northern mountains	RURAL	KINH	No	Married	Secondary school	Having paid work	NO
169129	1	1	1	1	1	90	23	1	FEMALE	Northern mountains	RURAL	KINH	No	Single	Higher	Having paid work	YES
169133	1	1	1	1	1	70	27	1	MALE	Northern mountains	RURAL	OTHER_MINORITY_GROUP_SPECIFY	No	Single	Higher	Having paid work	YES
169134	1	1	1	1	1	90	30	1	FEMALE	Northern mountains	RURAL	OTHER_MINORITY_GROUP_SPECIFY	No	Married	Higher	Having paid work	YES
169135	1	1	1	1	1	90	41	1	FEMALE	Northern mountains	RURAL	OTHER_MINORITY_GROUP_SPECIFY	No	Married	Primary school and lower	Having paid work	YES
169136	1	1	1	1	1	100	19	1	FEMALE	Northern mountains	URBAN	KINH	No	Single	High school	Having paid work	YES
169137	1	1	1	1	2	80	27	0.9362	FEMALE	Northern mountains	URBAN	KINH	No	Single	Higher	Having paid work	YES
169139	2	1	1	2	1	60	29	0.8469	MALE	Northern mountains	RURAL	OTHER_MINORITY_GROUP_SPECIFY	No	Married	Secondary school	Having paid work	YES
169199	1	1	1	1	1	80	26	1	MALE	Northern mountains	RURAL	KINH	No	Married	High school	Having paid work	NO
169200	1	1	1	1	2	90	29	0.9362	FEMALE	Northern mountains	RURAL	KINH	No	Married	Higher	Having paid work	YES
169201	1	1	1	1	1	100	32	1	MALE	Northern mountains	RURAL	OTHER_MINORITY_GROUP_SPECIFY	No	Married	Secondary school	Having paid work	YES
169202	1	1	1	1	1	80	38	1	MALE	Northern mountains	RURAL	OTHER_MINORITY_GROUP_SPECIFY	No	Married	Primary school and lower	Having paid work	YES
169203	1	1	1	1	1	90	30	1	MALE	Northern mountains	RURAL	KINH	No	Single	Secondary school	Having paid work	YES
169204	1	1	1	1	1	90	27	1	FEMALE	Highlands	URBAN	KINH	No	Married	Higher	Having paid work	YES
169205	1	1	1	1	1	90	44	1	MALE	Northern mountains	RURAL	KINH	No	Married	High school	Having paid work	YES
169208	1	1	1	1	1	90	51	1	MALE	Northern mountains	URBAN	KINH	No	Married	High school	Having paid work	YES
169209	1	1	1	1	1	90	22	1	FEMALE	Northern mountains	URBAN	KINH	No	Married	High school	Student/retired/Having unpaid work	YES
169210	1	1	1	1	1	90	24	1	FEMALE	Northern mountains	URBAN	OTHER_MINORITY_GROUP_SPECIFY	No	Married	Secondary school	Having paid work	NO
169211	1	1	1	1	1	80	43	1	MALE	Northern mountains	URBAN	KINH	Yes	Married	High school	Having paid work	NO
169224	1	1	1	2	1	90	49	0.9161	MALE	Northern mountains	RURAL	OTHER_MINORITY_GROUP_SPECIFY	No	Married	Primary school and lower	Having paid work	NO
169225	1	1	1	1	1	100	23	1	MALE	Northern mountains	RURAL	OTHER_MINORITY_GROUP_SPECIFY	No	Single	High school	Having paid work	YES
169226	1	1	1	1	1	80	23	1	MALE	Northern mountains	URBAN	KINH	No	Married	Higher	Having paid work	NO
169227	1	1	1	1	1	60	28	1	MALE	Northern mountains	URBAN	KINH	No	Married	Higher	Having paid work	NO
169228	1	1	1	1	1	100	50	1	MALE	Northern mountains	RURAL	OTHER_MINORITY_GROUP_SPECIFY	No	Married	Secondary school	Having paid work	YES
169229	1	1	1	1	1	100	20	1	MALE	Northern mountains	RURAL	OTHER_MINORITY_GROUP_SPECIFY	No	Single	Secondary school	Having paid work	NO
169230	1	1	1	2	1	80	32	0.9161	MALE	Northern mountains	URBAN	KINH	Yes	Married	High school	Having paid work	YES
169231	2	2	1	3	1	50	54	0.7359	MALE	Northern mountains	RURAL	KINH	No	Married	High school	Student/retired/Having unpaid work	YES
169232	1	1	1	2	2	80	21	0.8523	MALE	Northern mountains	RURAL	KINH	No	Single	High school	Having paid work	YES
169233	1	1	1	1	1	90	31	1	MALE	Northern mountains	RURAL	KINH	No	Married	High school	Having paid work	YES
169234	1	1	1	1	1	100	44	1	MALE	Northern mountains	RURAL	KINH	No	Married	High school	Having paid work	YES
169235	1	1	1	1	1	90	66	1	MALE	Highlands	URBAN	KINH	No	Married	Secondary school	Having paid work	YES
169236	1	1	1	1	2	70	58	0.9362	FEMALE	Highlands	URBAN	KINH	Yes	Married	Higher	Student/retired/Having unpaid work	YES
169237	1	1	1	3	1	60	59	0.8479	FEMALE	Highlands	URBAN	KINH	Yes	Married	Primary school and lower	Having paid work	YES
169238	1	1	1	2	1	90	33	0.9161	FEMALE	Highlands	URBAN	KINH	Yes	Married	High school	Having paid work	YES
169239	1	1	1	1	1	95	18	1	MALE	Highlands	URBAN	KINH	Yes	Single	High school	Student/retired/Having unpaid work	YES
169240	1	1	1	1	1	90	31	1	MALE	Highlands	URBAN	KINH	Yes	Single	High school	Having paid work	YES
169241	1	1	1	1	1	90	40	1	MALE	Highlands	RURAL	KINH	No	Married	Secondary school	Having paid work	NO
169266	1	1	1	1	1	90	31	1	MALE	Highlands	URBAN	KINH	Yes	Married	High school	Having paid work	YES
169267	4	2	2	3	2	60	60	0.4885	FEMALE	Highlands	URBAN	KINH	No	Married	Secondary school	Having paid work	YES
169268	1	1	1	1	1	90	67	1	FEMALE	Northern mountains	RURAL	KINH	No	Married	Secondary school	Student/retired/Having unpaid work	YES
169269	1	1	1	1	1	90	24	1	FEMALE	Northern mountains	RURAL	OTHER_MINORITY_GROUP_SPECIFY	No	Married	High school	Having paid work	YES
169271	1	1	1	1	1	80	21	1	MALE	Northern mountains	RURAL	KINH	No	Single	High school	Unable to work/ Unemployed	NO
169272	1	1	1	2	1	80	45	0.9161	MALE	Northern mountains	RURAL	OTHER_MINORITY_GROUP_SPECIFY	No	Married	Secondary school	Having paid work	YES
169273	1	1	1	1	1	70	19	1	MALE	Northern mountains	RURAL	KINH	No	Single	Secondary school	Unable to work/ Unemployed	NO
169274	1	1	1	2	1	95	21	0.9161	FEMALE	Northern mountains	RURAL	KINH	No	Single	High school	Having paid work	YES
169275	1	1	1	1	1	80	19	1	MALE	Northern mountains	RURAL	KINH	No	Single	Secondary school	Unable to work/ Unemployed	NO
169276	1	1	1	1	1	90	30	1	MALE	Northern mountains	RURAL	KINH	No	Single	Higher	Having paid work	YES
169277	1	1	1	2	1	60	34	0.9161	FEMALE	Highlands	URBAN	KINH	No	Married	Higher	Having paid work	YES
169278	1	1	1	1	1	80	35	1	MALE	Highlands	URBAN	KINH	Yes	Married	Higher	Having paid work	NO
169279	1	1	1	1	1	90	22	1	MALE	Highlands	RURAL	KINH	No	Single	Higher	Having paid work	YES
169289	1	1	1	1	1	90	18	1	MALE	Northern mountains	RURAL	OTHER_MINORITY_GROUP_SPECIFY	No	Single	High school	Student/retired/Having unpaid work	YES
169290	1	1	1	1	1	70	30	1	MALE	Northern mountains	RURAL	KINH	No	Single	Higher	Having paid work	NO
169291	1	1	1	2	1	70	30	0.9161	MALE	Highlands	URBAN	KINH	No	Married	High school	Having paid work	YES
169292	2	1	1	3	1	70	69	0.7787	FEMALE	Highlands	URBAN	KINH	Yes	Married	Primary school and lower	Having paid work	YES
169467	1	1	1	2	1	60	50	0.9161	MALE	Northern mountains	URBAN	KINH	No	Married	Higher	Having paid work	YES
169468	2	1	1	1	2	90	28	0.867	FEMALE	Northern mountains	URBAN	KINH	No	Married	Higher	Having paid work	YES
169469	1	1	1	1	1	90	28	1	MALE	Northern mountains	URBAN	KINH	No	Single	Higher	Having paid work	YES
169470	2	2	2	2	1	70	60	0.7577	MALE	Northern mountains	RURAL	OTHER_MINORITY_GROUP_SPECIFY	No	Married	Primary school and lower	Unable to work/ Unemployed	YES
169472	1	1	1	1	1	70	31	1	FEMALE	Northern mountains	RURAL	OTHER_MINORITY_GROUP_SPECIFY	No	Married	Higher	Having paid work	YES
169473	1	1	1	1	2	80	34	0.9362	FEMALE	Northern mountains	RURAL	KINH	No	Married	Secondary school	Having paid work	YES
169474	1	1	2	2	1	85	28	0.8697	MALE	Northern mountains	RURAL	OTHER_MINORITY_GROUP_SPECIFY	No	Married	Higher	Having paid work	YES
169475	1	1	2	2	1	90	27	0.8697	MALE	Northern mountains	RURAL	OTHER_MINORITY_GROUP_SPECIFY	No	Divorce/widow/separate/other	Secondary school	Having paid work	YES
169476	1	1	1	1	1	80	33	1	FEMALE	Northern mountains	RURAL	KINH	No	Married	High school	Having paid work	YES
169477	1	1	1	1	2	90	33	0.9362	FEMALE	Northern mountains	RURAL	KINH	No	Divorce/widow/separate/other	Secondary school	Having paid work	NO
169478	1	1	1	1	1	80	40	1	MALE	Northern mountains	URBAN	KINH	No	Divorce/widow/separate/other	Secondary school	Unable to work/ Unemployed	NO
169479	1	1	1	3	1	80	23	0.8479	MALE	Northern mountains	URBAN	KINH	No	Married	High school	Having paid work	NO
169481	1	1	1	4	1	60	56	0.73	MALE	Northern mountains	RURAL	OTHER_MINORITY_GROUP_SPECIFY	No	Married	High school	Student/retired/Having unpaid work	YES
169483	1	1	1	2	2	80	22	0.8523	FEMALE	Northern mountains	RURAL	OTHER_MINORITY_GROUP_SPECIFY	No	Married	Secondary school	Having paid work	YES
169485	1	1	1	1	1	100	54	1	MALE	Highlands	URBAN	KINH	Yes	Married	High school	Having paid work	YES
169486	1	1	1	1	1	90	26	1	MALE	Highlands	URBAN	KINH	Yes	Single	Higher	Having paid work	YES
169497	1	1	1	2	1	50	18	0.9161	MALE	Highlands	RURAL	KINH	No	Single	High school	Student/retired/Having unpaid work	NO
169498	1	1	1	1	1	80	50	1	MALE	Highlands	RURAL	KINH	No	Married	High school	Having paid work	YES
169521	1	1	1	1	1	80	26	1	FEMALE	Highlands	URBAN	KINH	No	Married	Higher	Having paid work	YES
169522	1	1	1	2	1	90	27	0.9161	FEMALE	Highlands	URBAN	KINH	No	Married	Secondary school	Having paid work	YES
169523	1	1	1	1	1	80	26	1	MALE	Highlands	RURAL	KINH	No	Single	Higher	Having paid work	NO
169723	1	1	1	1	1	90	60	1	MALE	Highlands	RURAL	KINH	No	Married	Secondary school	Having paid work	YES
169724	1	1	2	2	2	50	37	0.8059	MALE	Highlands	RURAL	KINH	No	Married	High school	Student/retired/Having unpaid work	YES
169725	1	1	1	2	1	80	35	0.9161	FEMALE	Highlands	RURAL	OTHER_MINORITY_GROUP_SPECIFY	No	Married	Secondary school	Having paid work	YES
169727	1	1	1	2	2	85	26	0.8523	FEMALE	Highlands	RURAL	KINH	No	Married	Higher	Student/retired/Having unpaid work	NO
169728	1	1	1	1	1	80	20	1	MALE	Highlands	URBAN	KINH	Yes	Single	High school	Student/retired/Having unpaid work	YES
169729	1	1	1	2	3	90	29	0.8035	FEMALE	Highlands	URBAN	KINH	No	Married	Secondary school	Having paid work	NO
169730	1	1	1	1	1	100	29	1	FEMALE	Highlands	RURAL	KINH	No	Single	Secondary school	Having paid work	YES
169740	1	1	1	1	2	70	26	0.9362	MALE	Highlands	RURAL	KINH	Yes	Married	High school	Having paid work	NO
169741	1	1	1	1	1	70	60	1	MALE	Highlands	RURAL	KINH	No	Married	High school	Student/retired/Having unpaid work	YES
169742	1	1	1	1	1	80	32	1	FEMALE	Highlands	RURAL	OTHER_MINORITY_GROUP_SPECIFY	No	Married	Higher	Having paid work	YES
169743	1	1	1	1	1	80	53	1	MALE	Highlands	URBAN	KINH	No	Married	Higher	Having paid work	YES
169790	1	1	1	2	2	80	64	0.8523	FEMALE	Highlands	RURAL	KINH	No	Divorce/widow/separate/other	High school	Having paid work	YES
169791	2	1	1	1	1	70	33	0.9308	MALE	Highlands	RURAL	KINH	No	Married	Higher	Having paid work	YES
169792	1	1	1	1	1	100	58	1	MALE	Highlands	RURAL	KINH	No	Married	Secondary school	Having paid work	YES
169793	1	1	1	2	1	99	57	0.9161	MALE	Central Coast	URBAN	KINH	Yes	Married	Secondary school	Having paid work	YES
169794	1	1	1	2	1	90	32	0.9161	MALE	Highlands	RURAL	KINH	No	Single	High school	Having paid work	YES
169795	1	1	1	1	1	70	23	1	FEMALE	Highlands	RURAL	KINH	No	Married	Secondary school	Having paid work	YES
169796	1	1	1	1	1	80	19	1	FEMALE	Highlands	RURAL	KINH	No	Single	High school	Having paid work	YES
169797	1	1	1	1	1	100	26	1	MALE	Highlands	RURAL	KINH	No	Single	Higher	Having paid work	NO
169798	1	1	1	2	1	80	57	0.9161	FEMALE	Highlands	RURAL	KINH	No	Married	High school	Student/retired/Having unpaid work	YES
169800	1	1	1	1	1	100	38	1	FEMALE	Highlands	RURAL	KINH	No	Married	Secondary school	Having paid work	YES
170223	1	1	1	3	1	90	49	0.8479	FEMALE	Highlands	RURAL	KINH	No	Married	Higher	Having paid work	YES
170224	1	1	1	1	1	80	27	1	FEMALE	Highlands	RURAL	KINH	No	Married	Higher	Having paid work	YES
170225	1	1	1	2	1	60	61	0.9161	FEMALE	Highlands	RURAL	KINH	Yes	Married	Secondary school	Having paid work	YES
170227	1	1	1	1	1	95	35	1	FEMALE	Highlands	RURAL	KINH	No	Married	Higher	Having paid work	YES
170228	1	1	1	2	1	70	19	0.9161	FEMALE	Highlands	RURAL	OTHER_MINORITY_GROUP_SPECIFY	Yes	Single	Secondary school	Having paid work	NO
170229	1	1	1	1	3	60	35	0.8874	MALE	Highlands	RURAL	KINH	No	Married	High school	Having paid work	NO
170230	1	1	1	1	1	90	34	1	FEMALE	Highlands	RURAL	KINH	No	Married	Higher	Having paid work	YES
170231	1	1	1	1	1	90	22	1	FEMALE	Highlands	RURAL	KINH	No	Single	High school	Having paid work	NO
170232	1	1	1	1	1	90	35	1	FEMALE	Highlands	RURAL	KINH	Yes	Married	Primary school and lower	Having paid work	NO
170233	1	1	1	1	1	90	57	1	MALE	Highlands	RURAL	KINH	No	Married	Secondary school	Having paid work	YES
170234	1	1	1	2	1	80	59	0.9161	FEMALE	Central Coast	URBAN	KINH	No	Divorce/widow/separate/other	Secondary school	Student/retired/Having unpaid work	YES
170235	1	1	1	2	1	80	30	0.9161	FEMALE	Highlands	RURAL	KINH	No	Married	Higher	Having paid work	YES
170236	4	1	2	2	1	50	45	0.6633	MALE	Highlands	RURAL	KINH	Yes	Married	Primary school and lower	Having paid work	NO
170237	1	1	1	1	1	90	21	1	MALE	Highlands	RURAL	OTHER_MINORITY_GROUP_SPECIFY	No	Single	Secondary school	Having paid work	NO
170238	1	1	1	1	3	50	24	0.8874	FEMALE	Highlands	RURAL	KINH	No	Single	Higher	Having paid work	NO
170239	1	1	1	2	1	95	42	0.9161	MALE	Highlands	RURAL	KINH	No	Married	Higher	Having paid work	YES
170240	1	1	1	1	2	95	23	0.9362	FEMALE	Highlands	RURAL	KINH	No	Single	Higher	Having paid work	YES
170241	1	1	1	1	1	100	59	1	FEMALE	Highlands	RURAL	KINH	No	Divorce/widow/separate/other	Secondary school	Having paid work	YES
170746	3	1	2	2	2	80	58	0.7274	MALE	Highlands	RURAL	KINH	No	Married	Secondary school	Having paid work	YES
170747	1	1	1	1	1	95	27	1	MALE	Central Coast	URBAN	KINH	No	Single	High school	Having paid work	YES
170748	1	1	1	1	2	100	51	0.9362	FEMALE	Central Coast	URBAN	KINH	Yes	Divorce/widow/separate/other	Secondary school	Having paid work	YES
170749	1	1	1	1	1	70	31	1	MALE	Central Coast	URBAN	KINH	Yes	Married	Primary school and lower	Having paid work	NO
170750	1	1	1	1	1	90	49	1	FEMALE	Central Coast	URBAN	KINH	No	Married	Secondary school	Student/retired/Having unpaid work	YES
170759	1	1	1	1	1	70	54	1	MALE	Highlands	RURAL	KINH	No	Married	High school	Unable to work/ Unemployed	YES
170761	1	1	1	1	1	100	54	1	FEMALE	Central Coast	URBAN	KINH	Yes	Married	Secondary school	Student/retired/Having unpaid work	YES
170762	1	1	1	1	1	90	65	1	FEMALE	Central Coast	URBAN	KINH	Yes	Divorce/widow/separate/other	Secondary school	Student/retired/Having unpaid work	YES
170763	1	1	1	1	1	85	77	1	MALE	Central Coast	URBAN	KINH	No	Married	High school	Unable to work/ Unemployed	YES
170764	1	1	1	1	2	90	23	0.9362	FEMALE	Central Coast	URBAN	KINH	No	Married	High school	Having paid work	YES
170766	1	1	1	1	1	97	25	1	MALE	Central Coast	URBAN	OTHER_MINORITY_GROUP_SPECIFY	No	Single	Higher	Having paid work	YES
170772	1	1	1	1	1	80	33	1	MALE	Highlands	RURAL	KINH	No	Married	Higher	Having paid work	YES
170773	2	2	2	2	1	70	50	0.7577	MALE	Central Coast	URBAN	KINH	No	Married	Secondary school	Having paid work	YES
170774	1	1	1	1	2	80	24	0.9362	FEMALE	Central Coast	URBAN	KINH	No	Married	Higher	Having paid work	YES
170775	1	1	1	2	1	70	53	0.9161	MALE	Central Coast	URBAN	KINH	No	Divorce/widow/separate/other	Secondary school	Having paid work	YES
170776	1	1	1	2	1	90	34	0.9161	FEMALE	Central Coast	URBAN	KINH	No	Married	Higher	Student/retired/Having unpaid work	YES
170777	1	1	1	1	2	70	38	0.9362	FEMALE	Central Coast	URBAN	KINH	No	Married	Secondary school	Having paid work	YES
170778	1	1	1	2	1	70	44	0.9161	MALE	Central Coast	URBAN	KINH	Yes	Married	Secondary school	Having paid work	YES
170779	1	1	1	1	2	61	46	0.9362	FEMALE	Central Coast	URBAN	KINH	Yes	Married	Secondary school	Having paid work	YES
170780	2	1	1	1	2	75	60	0.867	FEMALE	Central Coast	URBAN	KINH	Yes	Married	High school	Having paid work	YES
170781	1	1	1	2	1	85	23	0.9161	FEMALE	Central Coast	RURAL	KINH	No	Single	Higher	Having paid work	NO
170782	1	1	1	3	1	80	21	0.8479	MALE	Central Coast	URBAN	KINH	No	Single	High school	Having paid work	YES
170783	1	1	1	1	1	70	27	1	MALE	Central Coast	URBAN	KINH	Yes	Married	Higher	Having paid work	YES
170784	1	1	1	1	1	90	21	1	FEMALE	Central Coast	RURAL	KINH	No	Married	Secondary school	Having paid work	NO
170785	1	1	1	1	1	90	48	1	FEMALE	Central Coast	URBAN	KINH	Yes	Divorce/widow/separate/other	Primary school and lower	Having paid work	YES
170786	1	1	1	1	1	80	62	1	FEMALE	Central Coast	URBAN	KINH	Yes	Divorce/widow/separate/other	Higher	Having paid work	YES
170787	1	1	1	1	1	70	66	1	MALE	Central Coast	URBAN	KINH	No	Married	Higher	Student/retired/Having unpaid work	YES
170788	1	1	1	1	1	60	35	1	MALE	Central Coast	URBAN	KINH	No	Married	High school	Having paid work	YES
170789	1	1	1	1	1	80	38	1	MALE	Central Coast	URBAN	KINH	No	Married	Primary school and lower	Having paid work	YES
170790	1	1	1	2	1	90	41	0.9161	FEMALE	Central Coast	URBAN	KINH	Yes	Married	High school	Having paid work	NO
170791	1	1	1	1	1	80	21	1	MALE	Central Coast	URBAN	KINH	No	Single	High school	Having paid work	NO
170792	1	1	1	2	1	80	63	0.9161	MALE	Central Coast	URBAN	KINH	No	Married	Higher	Student/retired/Having unpaid work	YES
170793	1	1	1	2	1	75	28	0.9161	MALE	Central Coast	URBAN	KINH	No	Single	Higher	Having paid work	YES
170794	1	1	1	1	1	80	24	1	FEMALE	Central Coast	URBAN	KINH	No	Married	Higher	Having paid work	YES
170795	2	1	1	3	2	60	48	0.7149	FEMALE	Central Coast	URBAN	KINH	No	Married	High school	Having paid work	YES
170796	1	1	1	2	2	50	44	0.8523	FEMALE	Central Coast	URBAN	KINH	No	Married	Secondary school	Having paid work	YES
170798	1	1	1	1	2	80	51	0.9362	FEMALE	Central Coast	URBAN	KINH	Yes	Married	Secondary school	Having paid work	YES
170799	1	1	1	1	1	100	35	1	MALE	Central Coast	URBAN	KINH	No	Married	Primary school and lower	Having paid work	YES
170800	1	1	1	1	1	90	32	1	FEMALE	Central Coast	URBAN	KINH	Yes	Married	Higher	Having paid work	YES
170801	1	1	1	2	2	75	44	0.8523	MALE	Central Coast	URBAN	KINH	Yes	Married	Secondary school	Having paid work	YES
170802	1	1	1	2	1	50	36	0.9161	MALE	Central Coast	URBAN	KINH	No	Married	High school	Having paid work	NO
170803	1	1	1	3	1	70	38	0.8479	FEMALE	Central Coast	URBAN	KINH	No	Married	Secondary school	Having paid work	NO
170804	1	1	1	1	1	90	28	1	FEMALE	Central Coast	URBAN	KINH	No	Married	Higher	Having paid work	YES
170805	1	1	1	1	2	80	45	0.9362	MALE	Central Coast	URBAN	KINH	Yes	Married	High school	Having paid work	YES
170806	1	1	1	1	1	90	42	1	MALE	Central Coast	RURAL	KINH	Yes	Married	Secondary school	Having paid work	NO
170807	1	1	1	1	1	90	27	1	MALE	Highlands	RURAL	KINH	No	Single	High school	Having paid work	NO
170808	1	1	1	2	2	70	21	0.8523	MALE	Highlands	RURAL	KINH	No	Single	Higher	Having paid work	YES
170809	1	1	1	1	1	90	22	1	FEMALE	Highlands	RURAL	KINH	Yes	Single	High school	Having paid work	YES
170811	1	1	1	2	1	85	29	0.9161	FEMALE	Central Coast	URBAN	KINH	No	Married	Secondary school	Having paid work	YES
170812	1	1	1	1	2	80	28	0.9362	FEMALE	Central Coast	URBAN	KINH	No	Married	Higher	Having paid work	YES
170813	1	1	1	1	2	90	29	0.9362	FEMALE	Central Coast	URBAN	KINH	No	Married	Primary school and lower	Having paid work	YES
170814	1	1	1	1	1	70	29	1	MALE	Central Coast	URBAN	KINH	No	Single	Higher	Having paid work	YES
170816	1	1	1	1	1	85	45	1	MALE	Central Coast	URBAN	KINH	No	Married	Secondary school	Having paid work	YES
170818	1	1	1	1	1	80	23	1	MALE	Central Coast	RURAL	KINH	No	Single	High school	Having paid work	YES
170819	1	1	1	1	1	80	53	1	FEMALE	Central Coast	RURAL	KINH	No	Divorce/widow/separate/other	Primary school and lower	Student/retired/Having unpaid work	NO
170820	1	1	1	1	2	80	27	0.9362	FEMALE	Central Coast	RURAL	KINH	No	Married	Secondary school	Student/retired/Having unpaid work	NO
170821	1	1	1	1	1	90	26	1	FEMALE	Central Coast	RURAL	KINH	No	Married	Secondary school	Student/retired/Having unpaid work	NO
170822	1	1	1	1	2	50	51	0.9362	FEMALE	Central Coast	RURAL	KINH	No	Married	Secondary school	Student/retired/Having unpaid work	YES
170823	1	1	1	1	1	90	25	1	FEMALE	Central Coast	URBAN	KINH	No	Single	Higher	Having paid work	YES
170824	1	1	1	1	1	80	26	1	MALE	Central Coast	URBAN	KINH	No	Single	Higher	Having paid work	YES
170825	1	1	1	2	2	70	23	0.8523	MALE	Central Coast	URBAN	KINH	No	Single	Higher	Having paid work	YES
170826	2	1	1	2	1	70	61	0.8469	FEMALE	Central Coast	RURAL	KINH	No	Married	Primary school and lower	Student/retired/Having unpaid work	YES
170843	1	1	1	1	1	90	30	1	MALE	Central Coast	URBAN	KINH	Yes	Single	Primary school and lower	Having paid work	NO
170844	1	1	1	1	1	98	65	1	FEMALE	Central Coast	URBAN	KINH	No	Married	High school	Student/retired/Having unpaid work	YES
170845	1	1	1	1	2	80	44	0.9362	FEMALE	Central Coast	URBAN	KINH	No	Married	High school	Having paid work	YES
170846	1	1	1	1	2	80	34	0.9362	FEMALE	Central Coast	URBAN	KINH	No	Married	Higher	Having paid work	YES
170847	1	1	1	1	1	80	32	1	FEMALE	Central Coast	RURAL	KINH	No	Married	Primary school and lower	Having paid work	YES
170848	1	1	1	1	1	70	31	1	MALE	Central Coast	RURAL	KINH	No	Married	Primary school and lower	Having paid work	NO
170849	1	1	1	1	1	100	20	1	MALE	Central Coast	RURAL	KINH	No	Single	Secondary school	Having paid work	NO
170850	1	1	1	2	1	60	25	0.9161	MALE	Central Coast	RURAL	KINH	No	Single	High school	Having paid work	YES
170852	1	1	1	1	1	90	27	1	FEMALE	Central Coast	URBAN	KINH	Yes	Married	Higher	Having paid work	NO
170853	1	1	1	1	1	95	21	1	MALE	Central Coast	URBAN	KINH	No	Single	Higher	Having paid work	YES
170854	1	1	1	1	1	100	18	1	FEMALE	Central Coast	URBAN	KINH	No	Single	High school	Student/retired/Having unpaid work	YES
170855	1	1	1	1	1	70	24	1	MALE	Central Coast	URBAN	KINH	No	Single	High school	Having paid work	YES
170856	1	1	1	1	1	100	27	1	FEMALE	Central Coast	RURAL	KINH	No	Married	High school	Having paid work	YES
170857	1	1	1	1	1	90	37	1	MALE	Central Coast	RURAL	KINH	No	Married	Primary school and lower	Having paid work	NO
170858	1	1	1	1	1	90	27	1	MALE	Central Coast	RURAL	KINH	No	Single	Secondary school	Having paid work	YES
170859	1	1	1	1	1	70	38	1	MALE	Central Coast	RURAL	KINH	No	Married	Primary school and lower	Having paid work	NO
170860	1	1	1	1	1	70	48	1	MALE	Central Coast	RURAL	KINH	No	Single	Secondary school	Having paid work	NO
171223	1	1	1	1	2	90	33	0.9362	MALE	Central Coast	URBAN	KINH	No	Married	Higher	Having paid work	YES
171224	1	1	1	1	1	100	29	1	MALE	Central Coast	URBAN	KINH	No	Married	Higher	Having paid work	YES
171225	2	1	1	2	1	80	66	0.8469	FEMALE	Central Coast	RURAL	KINH	No	Married	Higher	Student/retired/Having unpaid work	YES
171226	2	1	1	2	1	70	28	0.8469	MALE	Central Coast	RURAL	KINH	No	Single	Secondary school	Having paid work	NO
171227	1	1	1	1	1	90	25	1	MALE	Central Coast	RURAL	KINH	No	Single	High school	Having paid work	YES
171228	1	1	1	2	1	80	30	0.9161	MALE	Central Coast	RURAL	KINH	No	Married	Secondary school	Having paid work	NO
171229	1	1	1	1	1	80	29	1	FEMALE	Central Coast	RURAL	KINH	No	Married	Primary school and lower	Student/retired/Having unpaid work	NO
171235	1	1	1	2	1	70	36	0.9161	FEMALE	Central Coast	URBAN	KINH	No	Divorce/widow/separate/other	High school	Having paid work	NO
171236	1	1	1	1	1	99	29	1	MALE	Central Coast	RURAL	KINH	No	Married	Higher	Having paid work	YES
171237	1	1	1	2	4	99	38	0.7448	MALE	Central Coast	RURAL	KINH	No	Married	Primary school and lower	Having paid work	NO
171356	1	1	1	1	1	80	29	1	MALE	Highlands	URBAN	KINH	Yes	Single	Secondary school	Having paid work	NO
171357	1	1	1	4	2	80	58	0.6662	MALE	Highlands	URBAN	KINH	Yes	Married	High school	Having paid work	YES
171358	1	1	1	1	2	80	31	0.9362	MALE	Highlands	RURAL	KINH	No	Single	Higher	Having paid work	NO
171359	2	1	1	2	1	80	58	0.8469	FEMALE	Highlands	RURAL	KINH	No	Married	Higher	Student/retired/Having unpaid work	YES
171360	1	1	1	2	1	80	49	0.9161	MALE	Highlands	RURAL	KINH	Yes	Married	Secondary school	Having paid work	YES
171361	1	1	1	3	1	70	53	0.8479	FEMALE	Highlands	RURAL	KINH	No	Married	Higher	Having paid work	YES
171362	1	1	1	1	1	80	35	1	FEMALE	Highlands	RURAL	KINH	No	Married	Primary school and lower	Having paid work	NO
171363	1	1	2	3	1	50	67	0.8015	FEMALE	Highlands	RURAL	KINH	Yes	Married	Primary school and lower	Having paid work	NO
171365	1	1	1	1	2	90	30	0.9362	MALE	Central Coast	URBAN	KINH	No	Married	High school	Having paid work	YES
171366	1	1	1	4	1	60	53	0.73	FEMALE	Central Coast	URBAN	KINH	No	Married	Secondary school	Having paid work	YES
171368	1	1	1	1	1	95	49	1	MALE	Central Coast	URBAN	KINH	No	Married	Higher	Having paid work	YES
171369	2	1	1	2	2	50	58	0.7831	MALE	Central Coast	URBAN	KINH	No	Married	Higher	Student/retired/Having unpaid work	YES
171370	1	1	1	2	1	80	26	0.9161	FEMALE	Central Coast	URBAN	KINH	No	Single	Higher	Student/retired/Having unpaid work	YES
171371	1	1	1	1	1	99	26	1	FEMALE	Central Coast	URBAN	KINH	No	Married	Higher	Having paid work	YES
171372	1	1	1	2	1	70	18	0.9161	MALE	Central Coast	URBAN	KINH	No	Single	High school	Student/retired/Having unpaid work	YES
171373	1	1	1	2	1	90	38	0.9161	FEMALE	Central Coast	URBAN	KINH	No	Married	Secondary school	Having paid work	YES
171374	1	1	1	2	1	70	18	0.9161	MALE	Central Coast	URBAN	KINH	Yes	Single	High school	Having paid work	YES
171375	1	1	1	1	2	70	39	0.9362	FEMALE	Central Coast	RURAL	KINH	No	Married	Secondary school	Having paid work	NO
171378	1	1	1	1	2	70	31	0.9362	FEMALE	Highlands	URBAN	KINH	Yes	Married	Secondary school	Having paid work	NO
171379	1	1	1	2	1	90	24	0.9161	MALE	Highlands	URBAN	KINH	No	Single	Higher	Student/retired/Having unpaid work	NO
171380	1	1	1	2	1	70	53	0.9161	FEMALE	Highlands	URBAN	KINH	No	Married	Higher	Having paid work	YES
171381	1	1	1	1	1	70	26	1	FEMALE	Highlands	URBAN	KINH	Yes	Married	Secondary school	Student/retired/Having unpaid work	YES
171382	1	1	1	1	1	90	30	1	MALE	Highlands	RURAL	KINH	No	Married	Higher	Having paid work	YES
171384	1	1	1	1	1	70	62	1	FEMALE	Highlands	RURAL	KINH	No	Married	Secondary school	Having paid work	YES
171385	1	1	1	1	1	80	54	1	MALE	Central Coast	URBAN	KINH	No	Married	Higher	Having paid work	YES
171386	1	1	1	1	2	80	32	0.9362	MALE	Central Coast	URBAN	KINH	No	Single	Higher	Having paid work	YES
171387	1	1	1	2	1	80	37	0.9161	FEMALE	Central Coast	URBAN	KINH	No	Married	High school	Having paid work	YES
171389	1	1	1	1	1	80	40	1	FEMALE	Central Coast	URBAN	KINH	No	Married	High school	Having paid work	YES
171390	1	1	1	1	1	90	26	1	FEMALE	Central Coast	RURAL	KINH	No	Married	High school	Having paid work	YES
171391	1	1	1	1	1	90	23	1	MALE	Central Coast	RURAL	KINH	Yes	Single	Higher	Having paid work	NO
171392	1	1	1	2	3	50	49	0.8035	FEMALE	Central Coast	RURAL	KINH	Yes	Married	Secondary school	Having paid work	YES
171393	1	1	1	2	1	70	23	0.9161	MALE	Central Coast	RURAL	KINH	Yes	Single	Higher	Student/retired/Having unpaid work	YES
171394	3	2	2	3	3	40	73	0.5676	FEMALE	Central Coast	RURAL	OTHER_MINORITY_GROUP_SPECIFY	Yes	Divorce/widow/separate/other	Secondary school	Unable to work/ Unemployed	YES
171395	1	1	1	1	1	100	27	1	FEMALE	Central Coast	RURAL	KINH	No	Married	Secondary school	Having paid work	NO
171396	1	1	1	1	1	80	49	1	MALE	Central Coast	RURAL	KINH	No	Married	Secondary school	Having paid work	NO
171397	1	1	1	1	1	90	26	1	MALE	Central Coast	RURAL	KINH	Yes	Married	Higher	Having paid work	NO
171398	1	1	1	1	1	80	21	1	MALE	Central Coast	RURAL	KINH	No	Single	High school	Having paid work	YES
171399	1	1	1	1	2	90	30	0.9362	FEMALE	Central Coast	RURAL	KINH	Yes	Married	Secondary school	Having paid work	NO
171400	1	1	2	2	1	50	39	0.8697	FEMALE	Central Coast	RURAL	KINH	Yes	Married	Higher	Having paid work	YES
171401	1	1	1	1	1	80	32	1	MALE	Central Coast	RURAL	KINH	No	Married	Higher	Having paid work	NO
171402	1	1	1	2	1	80	31	0.9161	FEMALE	Central Coast	RURAL	KINH	No	Married	Primary school and lower	Student/retired/Having unpaid work	NO
171403	1	1	1	1	2	90	22	0.9362	MALE	Central Coast	RURAL	KINH	No	Single	Higher	Student/retired/Having unpaid work	NO
171404	1	1	1	1	1	50	52	1	MALE	Central Coast	RURAL	KINH	No	Married	Secondary school	Having paid work	NO
171405	4	3	4	3	1	50	66	0.422	MALE	Central Coast	RURAL	KINH	No	Divorce/widow/separate/other	Primary school and lower	Unable to work/ Unemployed	YES
171406	1	1	1	4	4	30	64	0.5587	FEMALE	Central Coast	RURAL	KINH	Yes	Married	Primary school and lower	Having paid work	YES
171407	1	1	1	1	1	90	23	1	FEMALE	Central Coast	RURAL	KINH	No	Single	Higher	Having paid work	NO
171408	1	1	1	1	1	80	21	1	FEMALE	Central Coast	RURAL	KINH	No	Single	Higher	Having paid work	YES
171412	1	2	2	1	1	75	39	0.9108	FEMALE	Central Coast	RURAL	KINH	Yes	Married	Secondary school	Having paid work	NO
171413	1	1	1	1	1	100	26	1	MALE	Central Coast	RURAL	KINH	No	Single	High school	Having paid work	NO
171414	1	1	1	1	1	100	24	1	MALE	Central Coast	RURAL	KINH	No	Single	High school	Having paid work	YES
171416	1	1	1	1	1	80	47	1	MALE	Central Coast	RURAL	KINH	Yes	Married	Secondary school	Having paid work	NO
171417	4	1	3	4	4	20	37	0.2936	FEMALE	Central Coast	RURAL	KINH	No	Married	Primary school and lower	Having paid work	YES
171418	1	1	1	1	1	80	40	1	FEMALE	Central Coast	RURAL	KINH	No	Married	Primary school and lower	Having paid work	YES
171419	1	1	1	1	2	70	21	0.9362	FEMALE	Central Coast	RURAL	KINH	No	Single	Higher	Student/retired/Having unpaid work	YES
171420	1	1	1	1	1	80	18	1	FEMALE	Central Coast	RURAL	KINH	No	Married	High school	Student/retired/Having unpaid work	YES
171421	1	1	1	1	1	80	24	1	MALE	Central Coast	RURAL	KINH	No	Single	Secondary school	Having paid work	NO
171422	1	1	1	2	2	75	47	0.8523	MALE	Central Coast	RURAL	KINH	Yes	Married	Secondary school	Having paid work	YES
171423	1	1	1	1	1	80	35	1	FEMALE	Central Coast	RURAL	KINH	No	Married	Secondary school	Having paid work	NO
171424	1	1	1	1	2	60	25	0.9362	FEMALE	Central Coast	RURAL	KINH	No	Married	High school	Student/retired/Having unpaid work	YES
171425	1	1	1	2	1	75	45	0.9161	FEMALE	Central Coast	RURAL	KINH	No	Married	Primary school and lower	Student/retired/Having unpaid work	YES
171426	1	1	1	2	1	80	70	0.9161	MALE	Central Coast	RURAL	KINH	No	Married	Secondary school	Having paid work	YES
171427	1	1	1	1	1	85	25	1	MALE	Central Coast	RURAL	KINH	No	Single	Primary school and lower	Having paid work	NO
171428	1	1	1	2	1	80	24	0.9161	FEMALE	Central Coast	RURAL	KINH	No	Married	High school	Student/retired/Having unpaid work	YES
171429	1	1	1	1	1	100	42	1	FEMALE	Central Coast	RURAL	KINH	Yes	Married	Primary school and lower	Having paid work	NO
171430	1	1	1	1	1	80	62	1	MALE	Central Coast	RURAL	KINH	No	Divorce/widow/separate/other	High school	Having paid work	YES
171431	1	1	1	1	1	90	24	1	FEMALE	Central Coast	RURAL	KINH	No	Married	Primary school and lower	Student/retired/Having unpaid work	NO
171432	1	1	1	1	1	100	37	1	MALE	Central Coast	RURAL	KINH	No	Married	Higher	Having paid work	YES
171433	1	1	1	1	2	70	44	0.9362	MALE	Central Coast	RURAL	KINH	No	Married	Primary school and lower	Having paid work	NO
171434	1	1	1	1	1	90	31	1	MALE	Central Coast	RURAL	KINH	No	Married	Higher	Having paid work	YES
171436	1	1	1	1	1	60	57	1	MALE	Central Coast	RURAL	KINH	Yes	Married	Secondary school	Having paid work	YES
171437	1	1	1	2	2	50	39	0.8523	FEMALE	Central Coast	RURAL	KINH	No	Married	Secondary school	Having paid work	NO
171438	2	1	1	2	2	50	88	0.7831	MALE	Central Coast	RURAL	KINH	No	Divorce/widow/separate/other	Secondary school	Unable to work/ Unemployed	YES
171439	3	1	1	3	3	30	44	0.6568	MALE	Central Coast	RURAL	KINH	Yes	Married	Secondary school	Student/retired/Having unpaid work	NO
171440	1	1	1	1	1	100	40	1	MALE	Central Coast	RURAL	KINH	No	Married	Secondary school	Having paid work	YES
171441	1	1	1	1	1	90	43	1	FEMALE	Central Coast	RURAL	KINH	No	Married	Secondary school	Having paid work	YES
171442	1	1	1	1	2	70	22	0.9362	FEMALE	Central Coast	RURAL	KINH	Yes	Married	High school	Student/retired/Having unpaid work	YES
171443	1	1	1	2	2	80	36	0.8523	FEMALE	Central Coast	RURAL	KINH	No	Married	Primary school and lower	Having paid work	YES
171446	4	1	2	3	2	50	69	0.5313	MALE	Central Coast	RURAL	KINH	No	Married	Primary school and lower	Unable to work/ Unemployed	YES
171447	1	1	1	3	2	60	77	0.7841	MALE	Central Coast	RURAL	KINH	No	Married	Primary school and lower	Unable to work/ Unemployed	YES
171449	1	1	1	2	1	70	38	0.9161	MALE	Central Coast	RURAL	KINH	No	Married	Primary school and lower	Having paid work	YES
171450	1	1	1	2	1	80	55	0.9161	FEMALE	Central Coast	RURAL	KINH	No	Divorce/widow/separate/other	Primary school and lower	Having paid work	YES
171451	1	1	1	2	1	80	41	0.9161	FEMALE	Central Coast	RURAL	KINH	No	Divorce/widow/separate/other	Primary school and lower	Having paid work	NO
171452	1	1	1	1	1	90	25	1	MALE	Central Coast	RURAL	KINH	No	Single	Secondary school	Having paid work	YES
171453	1	1	1	2	1	70	53	0.9161	FEMALE	Central Coast	RURAL	KINH	No	Married	Secondary school	Having paid work	YES
171454	1	1	1	2	1	80	52	0.9161	MALE	Central Coast	RURAL	KINH	No	Married	Secondary school	Having paid work	NO
171455	1	1	1	1	1	90	62	1	MALE	Central Coast	RURAL	KINH	No	Married	High school	Having paid work	YES
171456	1	1	1	1	1	90	38	1	MALE	Central Coast	RURAL	KINH	No	Married	Primary school and lower	Having paid work	NO
171457	1	1	1	2	1	80	37	0.9161	FEMALE	Central Coast	RURAL	KINH	No	Married	Primary school and lower	Student/retired/Having unpaid work	YES
171464	1	1	1	1	1	80	34	1	MALE	Central Coast	RURAL	KINH	No	Married	Secondary school	Having paid work	NO
171466	1	1	1	2	1	70	58	0.9161	FEMALE	Central Coast	RURAL	KINH	Yes	Married	Secondary school	Having paid work	YES
171467	1	1	1	1	2	90	24	0.9362	FEMALE	Central Coast	RURAL	KINH	No	Married	Primary school and lower	Student/retired/Having unpaid work	YES
171468	1	1	1	2	1	70	23	0.9161	FEMALE	Central Coast	RURAL	KINH	No	Married	Secondary school	Having paid work	YES
171473	1	1	1	1	1	80	25	1	MALE	Central Coast	RURAL	KINH	No	Single	Secondary school	Having paid work	YES
171474	1	1	1	1	1	100	28	1	MALE	Central Coast	RURAL	KINH	No	Married	Higher	Having paid work	YES
171475	1	1	1	2	2	70	46	0.8523	FEMALE	Central Coast	RURAL	KINH	No	Married	Secondary school	Having paid work	YES
171476	1	1	1	3	2	50	28	0.7841	FEMALE	Central Coast	RURAL	KINH	No	Married	Secondary school	Having paid work	YES
171477	1	1	1	1	1	80	32	1	FEMALE	Central Coast	RURAL	KINH	No	Married	Higher	Student/retired/Having unpaid work	NO
171478	4	1	1	2	2	60	50	0.6459	FEMALE	Central Coast	RURAL	KINH	No	Married	Secondary school	Having paid work	NO
171479	1	1	1	2	4	70	57	0.7448	FEMALE	Central Coast	RURAL	KINH	No	Married	Secondary school	Student/retired/Having unpaid work	NO
171480	1	1	1	1	1	99	21	1	MALE	Central Coast	RURAL	KINH	No	Single	High school	Student/retired/Having unpaid work	YES
171481	1	1	1	1	1	90	21	1	MALE	Central Coast	RURAL	KINH	No	Single	High school	Student/retired/Having unpaid work	YES
171482	1	1	1	1	1	70	29	1	FEMALE	Central Coast	RURAL	KINH	No	Married	Secondary school	Student/retired/Having unpaid work	NO
171738	1	1	1	1	1	90	33	1	FEMALE	Central Coast	RURAL	KINH	No	Married	Higher	Student/retired/Having unpaid work	YES
171739	1	1	1	1	1	80	41	1	MALE	Central Coast	RURAL	KINH	No	Married	Higher	Having paid work	YES
171740	1	1	1	1	1	70	24	1	MALE	Central Coast	RURAL	KINH	No	Single	Secondary school	Student/retired/Having unpaid work	NO
171741	1	1	1	1	1	80	57	1	MALE	Central Coast	RURAL	KINH	No	Married	Secondary school	Student/retired/Having unpaid work	YES
171742	1	1	1	1	1	80	33	1	MALE	Central Coast	RURAL	KINH	No	Married	Higher	Having paid work	YES
171743	1	1	1	1	1	70	69	1	FEMALE	Central Coast	RURAL	KINH	No	Married	Primary school and lower	Student/retired/Having unpaid work	YES
171744	1	1	1	1	1	80	70	1	FEMALE	Central Coast	RURAL	KINH	No	Divorce/widow/separate/other	Primary school and lower	Student/retired/Having unpaid work	YES
171745	2	1	2	2	1	70	25	0.8005	FEMALE	Central Coast	RURAL	KINH	No	Married	High school	Student/retired/Having unpaid work	YES
171746	1	1	1	1	1	80	56	1	MALE	Central Coast	RURAL	KINH	No	Married	High school	Having paid work	YES
171747	1	1	1	2	1	70	45	0.9161	MALE	Central Coast	RURAL	KINH	No	Married	Secondary school	Having paid work	NO
171748	1	1	1	2	1	95	25	0.9161	MALE	Central Coast	RURAL	KINH	No	Single	Higher	Having paid work	YES
171749	1	1	1	1	2	80	31	0.9362	MALE	Central Coast	RURAL	KINH	No	Married	Higher	Having paid work	YES
171750	2	2	1	3	3	50	71	0.6233	FEMALE	Central Coast	RURAL	KINH	No	Married	Primary school and lower	Student/retired/Having unpaid work	YES
171751	1	1	1	2	2	70	62	0.8523	FEMALE	Central Coast	RURAL	KINH	No	Married	Primary school and lower	Having paid work	NO
171761	1	1	1	1	2	80	22	0.9362	MALE	Central Coast	RURAL	KINH	No	Single	High school	Student/retired/Having unpaid work	YES
171762	1	1	1	2	1	60	45	0.9161	MALE	Central Coast	RURAL	KINH	No	Married	Primary school and lower	Having paid work	NO
171764	1	1	1	1	1	70	32	1	FEMALE	Central Coast	RURAL	KINH	No	Married	Secondary school	Having paid work	YES
171765	2	1	2	3	3	50	59	0.6197	FEMALE	Central Coast	RURAL	KINH	No	Divorce/widow/separate/other	Primary school and lower	Having paid work	YES
171766	1	1	1	2	1	90	33	0.9161	FEMALE	Central Coast	RURAL	KINH	No	Married	Secondary school	Having paid work	YES
171767	1	1	1	1	1	90	28	1	MALE	Central Coast	RURAL	KINH	No	Married	High school	Having paid work	YES
171768	1	1	1	1	1	100	30	1	FEMALE	Central Coast	RURAL	KINH	No	Married	Primary school and lower	Having paid work	NO
171769	2	1	1	1	2	90	22	0.867	MALE	Central Coast	RURAL	KINH	Yes	Single	Higher	Having paid work	YES
171770	1	1	1	1	1	80	38	1	MALE	Central Coast	RURAL	KINH	No	Married	Higher	Having paid work	YES
171771	1	1	1	1	1	80	41	1	MALE	Central Coast	RURAL	KINH	No	Married	Secondary school	Having paid work	YES
171772	1	1	1	1	1	100	22	1	FEMALE	Central Coast	RURAL	KINH	No	Married	Higher	Having paid work	YES
171774	1	1	1	1	3	50	24	0.8874	MALE	Central Coast	RURAL	KINH	No	Single	Secondary school	Having paid work	NO
171775	1	1	1	2	2	60	55	0.8523	FEMALE	Central Coast	RURAL	KINH	No	Married	Primary school and lower	Student/retired/Having unpaid work	YES
171776	1	1	1	1	1	80	26	1	FEMALE	Central Coast	RURAL	KINH	No	Single	Secondary school	Having paid work	NO
171777	1	1	1	2	1	80	52	0.9161	FEMALE	Central Coast	RURAL	KINH	No	Married	Primary school and lower	Student/retired/Having unpaid work	NO
171778	1	1	1	2	1	90	57	0.9161	MALE	South-East	URBAN	KINH	No	Married	Secondary school	Unable to work/ Unemployed	YES
171779	1	1	1	2	2	70	19	0.8523	FEMALE	South-East	URBAN	KINH	Yes	Single	High school	Student/retired/Having unpaid work	YES
171780	1	1	1	1	1	75	60	1	FEMALE	Central Coast	RURAL	KINH	Yes	Married	High school	Student/retired/Having unpaid work	NO
171781	1	1	1	1	1	70	62	1	FEMALE	Central Coast	RURAL	KINH	No	Married	Primary school and lower	Student/retired/Having unpaid work	YES
171791	1	1	1	4	1	50	36	0.73	MALE	Central Coast	RURAL	KINH	No	Married	Secondary school	Having paid work	NO
171792	1	1	1	1	1	95	29	1	FEMALE	Central Coast	RURAL	KINH	No	Married	Higher	Having paid work	YES
171793	1	1	1	1	1	100	35	1	MALE	Central Coast	RURAL	KINH	No	Married	Secondary school	Having paid work	NO
171794	1	1	1	3	2	40	33	0.7841	FEMALE	Central Coast	RURAL	KINH	No	Married	Higher	Having paid work	NO
171795	2	1	1	1	1	70	49	0.9308	FEMALE	Central Coast	RURAL	KINH	No	Married	Secondary school	Having paid work	YES
171796	1	1	1	2	3	60	44	0.8035	MALE	Central Coast	RURAL	KINH	No	Married	Secondary school	Having paid work	YES
171797	1	1	1	2	1	90	42	0.9161	MALE	Central Coast	RURAL	KINH	No	Married	Secondary school	Having paid work	YES
171798	1	1	1	1	1	70	46	1	FEMALE	Central Coast	RURAL	KINH	No	Married	Secondary school	Having paid work	YES
171799	1	1	1	1	1	90	61	1	MALE	South-East	URBAN	KINH	Yes	Married	Higher	Student/retired/Having unpaid work	YES
171800	1	1	1	2	1	80	25	0.9161	MALE	South-East	URBAN	KINH	No	Single	Higher	Having paid work	YES
171801	1	1	1	1	1	90	20	1	MALE	Central Coast	RURAL	KINH	No	Single	High school	Student/retired/Having unpaid work	YES
171802	1	1	1	1	2	90	32	0.9362	FEMALE	Central Coast	RURAL	KINH	No	Married	Primary school and lower	Having paid work	NO
171803	1	1	1	1	1	80	41	1	MALE	Central Coast	RURAL	KINH	No	Married	Secondary school	Having paid work	YES
171804	2	1	1	2	1	80	47	0.8469	FEMALE	Central Coast	RURAL	KINH	No	Married	Primary school and lower	Having paid work	YES
171805	1	1	1	1	1	80	30	1	MALE	Central Coast	RURAL	KINH	No	Married	Secondary school	Having paid work	NO
171806	3	1	2	2	4	50	52	0.6199	MALE	Central Coast	RURAL	KINH	No	Married	Primary school and lower	Having paid work	YES
171807	2	2	1	1	2	70	31	0.8242	FEMALE	Central Coast	RURAL	KINH	No	Married	Higher	Having paid work	YES
171808	1	1	1	1	1	80	32	1	FEMALE	Central Coast	RURAL	KINH	No	Divorce/widow/separate/other	Primary school and lower	Having paid work	YES
171809	1	1	1	1	1	90	41	1	MALE	Central Coast	RURAL	KINH	No	Married	Secondary school	Having paid work	YES
171811	1	1	1	1	1	90	20	1	FEMALE	South-East	URBAN	KINH	Yes	Single	High school	Student/retired/Having unpaid work	YES
171813	1	1	1	1	1	100	48	1	FEMALE	South-East	URBAN	KINH	Yes	Single	High school	Having paid work	YES
171814	1	1	1	2	1	80	21	0.9161	MALE	South-East	URBAN	KINH	No	Single	Higher	Having paid work	YES
171818	1	1	1	1	1	90	39	1	MALE	Central Coast	RURAL	KINH	No	Married	Primary school and lower	Having paid work	YES
171819	1	1	1	1	2	70	60	0.9362	FEMALE	Central Coast	RURAL	KINH	No	Married	Higher	Student/retired/Having unpaid work	YES
171820	1	1	1	2	1	80	49	0.9161	MALE	Central Coast	RURAL	KINH	No	Married	Primary school and lower	Having paid work	YES
171821	1	1	1	2	1	90	39	0.9161	MALE	Central Coast	RURAL	KINH	No	Married	Primary school and lower	Having paid work	NO
171822	2	1	1	2	2	50	64	0.7831	FEMALE	Central Coast	RURAL	KINH	No	Divorce/widow/separate/other	Primary school and lower	Student/retired/Having unpaid work	YES
171823	1	1	1	2	1	80	39	0.9161	MALE	Central Coast	RURAL	KINH	No	Married	Primary school and lower	Having paid work	NO
171824	1	1	1	1	2	70	54	0.9362	MALE	Central Coast	RURAL	KINH	No	Married	Secondary school	Having paid work	YES
171825	1	1	1	2	1	70	26	0.9161	MALE	Central Coast	RURAL	KINH	Yes	Married	Primary school and lower	Having paid work	NO
171826	1	1	1	1	1	80	54	1	MALE	Central Coast	RURAL	KINH	No	Married	Secondary school	Having paid work	NO
171827	1	1	1	1	2	90	39	0.9362	FEMALE	Central Coast	RURAL	KINH	No	Married	Primary school and lower	Having paid work	YES
171828	1	1	1	1	2	50	53	0.9362	MALE	Central Coast	RURAL	KINH	No	Married	Primary school and lower	Having paid work	YES
171829	1	1	1	1	1	90	45	1	MALE	Central Coast	RURAL	KINH	No	Married	Primary school and lower	Having paid work	YES
171830	1	1	1	2	1	70	40	0.9161	MALE	Central Coast	RURAL	KINH	No	Married	Primary school and lower	Having paid work	NO
171831	1	1	1	2	1	95	29	0.9161	MALE	Central Coast	RURAL	KINH	No	Married	Higher	Having paid work	YES
171832	1	1	1	1	1	70	67	1	MALE	South-East	URBAN	KINH	No	Married	High school	Student/retired/Having unpaid work	YES
171833	1	1	1	1	1	89	19	1	MALE	South-East	URBAN	KINH	No	Single	High school	Student/retired/Having unpaid work	YES
171834	1	1	1	1	2	90	20	0.9362	MALE	South-East	URBAN	KINH	No	Single	High school	Student/retired/Having unpaid work	YES
171835	1	1	1	1	1	95	19	1	MALE	South-East	URBAN	KINH	No	Single	High school	Student/retired/Having unpaid work	YES
171836	1	1	1	1	1	80	19	1	MALE	South-East	URBAN	KINH	No	Single	High school	Student/retired/Having unpaid work	YES
171837	1	1	1	1	2	95	19	0.9362	FEMALE	South-East	URBAN	KINH	No	Single	High school	Student/retired/Having unpaid work	YES
171844	1	1	1	1	1	90	59	1	MALE	South-East	URBAN	KINH	No	Married	Secondary school	Student/retired/Having unpaid work	YES
171845	2	1	1	2	1	80	26	0.8469	MALE	South-East	URBAN	OTHER_MINORITY_GROUP_SPECIFY	Yes	Married	Higher	Having paid work	YES
171846	1	1	1	1	1	80	47	1	MALE	Central Coast	RURAL	KINH	No	Married	High school	Having paid work	YES
171847	1	1	1	1	1	100	23	1	MALE	South-East	URBAN	KINH	No	Single	Secondary school	Having paid work	YES
171848	1	1	1	1	1	100	20	1	MALE	South-East	URBAN	KINH	No	Single	High school	Student/retired/Having unpaid work	YES
171849	1	1	1	2	2	80	21	0.8523	MALE	South-East	URBAN	KINH	No	Single	High school	Student/retired/Having unpaid work	YES
171850	1	1	1	2	1	80	53	0.9161	FEMALE	South-East	URBAN	KINH	Yes	Married	Primary school and lower	Having paid work	YES
171851	1	1	1	1	1	80	18	1	MALE	South-East	URBAN	KINH	No	Single	High school	Student/retired/Having unpaid work	YES
171852	1	1	1	1	1	70	20	1	MALE	South-East	URBAN	KINH	Yes	Single	High school	Student/retired/Having unpaid work	YES
171853	1	1	1	1	1	90	33	1	FEMALE	South-East	URBAN	KINH	Yes	Married	Secondary school	Having paid work	YES
171854	1	1	1	1	1	80	39	1	FEMALE	South-East	URBAN	KINH	Yes	Divorce/widow/separate/other	Secondary school	Having paid work	YES
171855	1	1	1	1	1	98	21	1	MALE	South-East	URBAN	KINH	Yes	Single	High school	Having paid work	YES
171856	1	1	1	1	2	90	18	0.9362	MALE	South-East	URBAN	KINH	No	Single	Secondary school	Student/retired/Having unpaid work	YES
171857	1	1	1	2	2	60	19	0.8523	FEMALE	South-East	URBAN	KINH	No	Single	High school	Student/retired/Having unpaid work	YES
171859	1	1	1	2	3	80	19	0.8035	FEMALE	South-East	URBAN	KINH	Yes	Single	High school	Student/retired/Having unpaid work	YES
171860	1	1	1	1	3	80	21	0.8874	FEMALE	South-East	URBAN	KINH	No	Single	High school	Student/retired/Having unpaid work	YES
171861	1	1	1	1	1	90	22	1	MALE	South-East	URBAN	KINH	No	Single	High school	Student/retired/Having unpaid work	YES
171862	1	1	1	1	1	100	21	1	FEMALE	South-East	URBAN	KINH	No	Single	High school	Student/retired/Having unpaid work	YES
171863	1	1	1	1	1	50	60	1	MALE	South-East	URBAN	KINH	No	Married	Secondary school	Having paid work	YES
171864	1	1	1	2	1	80	40	0.9161	FEMALE	South-East	URBAN	KINH	No	Married	Higher	Having paid work	YES
171870	2	2	2	3	3	50	52	0.5769	FEMALE	Central Coast	RURAL	KINH	No	Married	Secondary school	Student/retired/Having unpaid work	YES
171871	1	1	1	1	1	80	60	1	FEMALE	South-East	URBAN	KINH	Yes	Divorce/widow/separate/other	Primary school and lower	Having paid work	NO
171872	1	1	1	1	1	100	19	1	MALE	South-East	URBAN	KINH	No	Single	High school	Student/retired/Having unpaid work	YES
171873	1	1	1	2	2	86	21	0.8523	MALE	South-East	URBAN	KINH	No	Single	High school	Student/retired/Having unpaid work	YES
171874	1	1	1	2	1	80	19	0.9161	FEMALE	South-East	URBAN	KINH	No	Single	High school	Student/retired/Having unpaid work	YES
171875	1	1	1	1	1	90	19	1	FEMALE	South-East	URBAN	KINH	No	Single	High school	Student/retired/Having unpaid work	YES
171876	1	1	1	2	2	90	21	0.8523	FEMALE	South-East	URBAN	KINH	No	Single	High school	Student/retired/Having unpaid work	YES
171883	1	1	1	2	2	85	18	0.8523	MALE	South-East	URBAN	KINH	No	Single	High school	Student/retired/Having unpaid work	YES
171884	1	1	2	2	3	80	19	0.7571	FEMALE	South-East	URBAN	KINH	No	Single	High school	Student/retired/Having unpaid work	YES
171885	1	1	1	1	2	90	29	0.9362	FEMALE	South-East	URBAN	KINH	No	Single	Higher	Having paid work	YES
171886	1	1	1	1	1	80	23	1	MALE	South-East	URBAN	KINH	No	Single	Higher	Student/retired/Having unpaid work	YES
171887	1	1	1	1	1	80	55	1	FEMALE	South-East	URBAN	KINH	No	Single	Secondary school	Student/retired/Having unpaid work	YES
171888	1	1	1	2	2	90	41	0.8523	MALE	South-East	URBAN	KINH	Yes	Divorce/widow/separate/other	Secondary school	Having paid work	YES
171889	1	1	1	1	1	80	39	1	FEMALE	Central Coast	RURAL	KINH	Yes	Married	Secondary school	Having paid work	NO
171890	1	1	1	1	1	90	26	1	FEMALE	Central Coast	RURAL	KINH	No	Married	Higher	Having paid work	YES
171891	1	1	1	1	1	80	56	1	FEMALE	Central Coast	RURAL	KINH	No	Married	Secondary school	Having paid work	YES
171892	1	1	1	1	1	90	27	1	FEMALE	Central Coast	RURAL	KINH	No	Married	High school	Student/retired/Having unpaid work	YES
171893	1	1	1	1	1	90	23	1	MALE	Central Coast	RURAL	KINH	No	Single	Higher	Student/retired/Having unpaid work	YES
171894	1	1	1	1	1	100	23	1	FEMALE	Central Coast	RURAL	KINH	No	Single	Higher	Having paid work	NO
171909	1	1	1	1	1	90	42	1	MALE	Central Coast	RURAL	KINH	No	Married	High school	Having paid work	YES
171910	1	1	1	2	1	80	39	0.9161	FEMALE	Central Coast	RURAL	KINH	No	Married	Higher	Having paid work	YES
171911	1	1	1	1	1	85	30	1	FEMALE	Central Coast	RURAL	KINH	No	Married	Higher	Having paid work	YES
171912	1	1	1	1	2	90	26	0.9362	MALE	Central Coast	RURAL	KINH	Yes	Married	Higher	Having paid work	YES
171913	1	1	1	1	1	50	52	1	MALE	Central Coast	RURAL	KINH	No	Married	Secondary school	Having paid work	NO
171914	2	1	2	2	1	60	48	0.8005	MALE	Central Coast	RURAL	KINH	Yes	Single	Higher	Having paid work	YES
171915	1	1	1	1	1	100	29	1	FEMALE	Central Coast	RURAL	KINH	Yes	Married	Higher	Student/retired/Having unpaid work	YES
171916	1	1	1	1	1	90	35	1	MALE	Central Coast	RURAL	KINH	Yes	Married	Secondary school	Having paid work	NO
171917	1	1	1	2	1	95	28	0.9161	FEMALE	Central Coast	RURAL	KINH	No	Married	Higher	Having paid work	YES
171918	1	1	1	1	2	90	39	0.9362	FEMALE	Central Coast	RURAL	KINH	No	Married	Primary school and lower	Having paid work	YES
171919	1	1	1	1	1	70	31	1	FEMALE	Central Coast	RURAL	KINH	No	Married	Secondary school	Having paid work	NO
171920	2	1	1	2	1	50	65	0.8469	FEMALE	Central Coast	RURAL	KINH	No	Divorce/widow/separate/other	Primary school and lower	Student/retired/Having unpaid work	YES
171921	1	1	1	2	1	50	55	0.9161	FEMALE	Central Coast	RURAL	KINH	No	Single	Primary school and lower	Having paid work	YES
171922	2	1	1	3	1	40	66	0.7787	FEMALE	Central Coast	RURAL	KINH	Yes	Married	Primary school and lower	Student/retired/Having unpaid work	YES
171923	1	1	1	1	1	60	41	1	MALE	South-East	URBAN	KINH	No	Married	Higher	Having paid work	NO
171924	1	1	1	2	1	95	51	0.9161	MALE	South-East	URBAN	KINH	No	Married	High school	Having paid work	YES
171925	1	1	1	1	1	80	19	1	FEMALE	South-East	URBAN	KINH	No	Single	High school	Student/retired/Having unpaid work	YES
171926	1	1	1	2	1	70	20	0.9161	FEMALE	South-East	URBAN	KINH	No	Single	High school	Student/retired/Having unpaid work	YES
171927	1	1	1	1	2	90	21	0.9362	FEMALE	South-East	URBAN	KINH	No	Single	High school	Student/retired/Having unpaid work	YES
171928	1	1	1	1	2	85	21	0.9362	FEMALE	South-East	URBAN	KINH	No	Single	High school	Student/retired/Having unpaid work	YES
171929	1	1	1	1	1	90	20	1	FEMALE	South-East	URBAN	KINH	Yes	Single	High school	Student/retired/Having unpaid work	YES
171930	1	1	1	1	1	100	36	1	FEMALE	South-East	URBAN	KINH	No	Married	High school	Student/retired/Having unpaid work	NO
171932	1	1	1	1	1	100	47	1	FEMALE	South-East	URBAN	KINH	Yes	Married	High school	Having paid work	YES
171933	1	1	1	2	1	75	73	0.9161	FEMALE	South-East	URBAN	KINH	No	Married	High school	Student/retired/Having unpaid work	YES
171937	1	1	1	2	1	75	73	0.9161	FEMALE	South-East	URBAN	KINH	No	Divorce/widow/separate/other	Primary school and lower	Unable to work/ Unemployed	YES
171938	1	1	1	1	1	50	64	1	FEMALE	South-East	URBAN	KINH	Yes	Divorce/widow/separate/other	High school	Student/retired/Having unpaid work	YES
171939	1	1	1	1	1	90	44	1	FEMALE	South-East	URBAN	KINH	No	Married	Secondary school	Student/retired/Having unpaid work	YES
171940	1	1	1	1	1	80	56	1	FEMALE	South-East	URBAN	KINH	No	Divorce/widow/separate/other	Secondary school	Having paid work	YES
171942	1	1	1	1	2	70	41	0.9362	FEMALE	South-East	URBAN	KINH	No	Married	High school	Having paid work	YES
171949	1	1	1	1	1	80	32	1	FEMALE	Central Coast	RURAL	KINH	Yes	Married	Higher	Having paid work	YES
171950	1	1	3	2	3	50	43	0.7448	FEMALE	Central Coast	RURAL	KINH	No	Married	Primary school and lower	Having paid work	YES
171951	1	1	1	1	1	80	25	1	FEMALE	South-East	URBAN	KINH	No	Married	Higher	Having paid work	YES
171953	1	1	1	2	1	95	46	0.9161	FEMALE	South-East	URBAN	KINH	No	Married	Secondary school	Having paid work	YES
171954	1	1	1	3	1	65	23	0.8479	MALE	South-East	URBAN	KINH	Yes	Single	Higher	Having paid work	YES
171955	1	1	1	2	1	80	32	0.9161	FEMALE	South-East	URBAN	KINH	Yes	Married	Higher	Having paid work	YES
171956	1	1	1	1	1	80	19	1	MALE	South-East	URBAN	KINH	No	Single	High school	Student/retired/Having unpaid work	YES
171957	1	1	2	1	1	80	65	0.9536	FEMALE	South-East	URBAN	KINH	No	Married	Higher	Student/retired/Having unpaid work	YES
171958	1	1	1	2	1	80	39	0.9161	FEMALE	South-East	URBAN	KINH	Yes	Married	High school	Having paid work	NO
171959	1	1	1	1	1	80	19	1	MALE	South-East	URBAN	KINH	No	Single	High school	Student/retired/Having unpaid work	YES
171960	1	1	1	1	2	90	53	0.9362	FEMALE	South-East	URBAN	KINH	Yes	Divorce/widow/separate/other	Secondary school	Student/retired/Having unpaid work	YES
171961	1	1	1	2	3	80	59	0.8035	FEMALE	South-East	URBAN	KINH	Yes	Married	High school	Student/retired/Having unpaid work	YES
171962	1	1	1	1	1	90	43	1	FEMALE	South-East	URBAN	KINH	No	Married	High school	Having paid work	YES
171963	1	1	1	1	1	100	42	1	FEMALE	South-East	URBAN	KINH	No	Married	Secondary school	Having paid work	NO
171964	1	1	1	1	1	90	47	1	MALE	South-East	URBAN	KINH	No	Married	Higher	Having paid work	YES
171965	1	1	1	2	1	90	48	0.9161	MALE	South-East	URBAN	KINH	No	Married	Higher	Having paid work	YES
171973	1	1	1	1	1	80	61	1	FEMALE	South-East	URBAN	KINH	Yes	Married	Primary school and lower	Student/retired/Having unpaid work	YES
171974	2	1	1	2	1	60	51	0.8469	FEMALE	South-East	URBAN	KINH	Yes	Married	Secondary school	Having paid work	YES
171975	2	1	1	3	3	60	56	0.6661	FEMALE	South-East	URBAN	KINH	No	Married	High school	Student/retired/Having unpaid work	YES
171976	1	1	1	1	1	90	41	1	FEMALE	South-East	URBAN	KINH	No	Married	Primary school and lower	Having paid work	YES
171977	1	1	1	1	2	95	38	0.9362	FEMALE	South-East	URBAN	KINH	Yes	Divorce/widow/separate/other	High school	Having paid work	YES
171978	1	1	1	1	1	60	68	1	MALE	South-East	URBAN	KINH	No	Married	Secondary school	Student/retired/Having unpaid work	YES
171979	2	1	1	2	3	60	46	0.7343	MALE	South-East	RURAL	KINH	No	Married	High school	Having paid work	NO
171980	1	1	1	1	1	90	36	1	FEMALE	South-East	RURAL	KINH	Yes	Divorce/widow/separate/other	Primary school and lower	Having paid work	YES
171983	1	1	1	1	2	85	21	0.9362	FEMALE	South-East	URBAN	KINH	No	Single	High school	Student/retired/Having unpaid work	YES
171984	1	1	1	1	1	85	32	1	FEMALE	South-East	URBAN	KINH	No	Divorce/widow/separate/other	High school	Having paid work	YES
171985	1	1	1	1	1	80	31	1	FEMALE	South-East	URBAN	KINH	Yes	Married	Higher	Having paid work	YES
171986	1	1	1	1	2	80	20	0.9362	MALE	South-East	URBAN	KINH	No	Single	High school	Student/retired/Having unpaid work	YES
171987	1	1	1	1	1	80	35	1	FEMALE	South-East	URBAN	KINH	Yes	Married	Higher	Having paid work	YES
171988	1	1	1	1	1	90	46	1	FEMALE	South-East	URBAN	KINH	Yes	Married	High school	Having paid work	NO
171989	1	1	1	1	2	83	31	0.9362	FEMALE	South-East	URBAN	KINH	No	Married	Higher	Having paid work	YES
171990	1	1	1	2	1	80	64	0.9161	MALE	South-East	URBAN	KINH	No	Married	Secondary school	Student/retired/Having unpaid work	YES
171991	2	1	1	1	1	90	37	0.9308	FEMALE	South-East	URBAN	KINH	Yes	Married	High school	Having paid work	YES
171992	2	1	1	2	5	70	44	0.6081	MALE	South-East	URBAN	KINH	No	Married	Secondary school	Having paid work	YES
171997	1	1	1	1	1	100	47	1	MALE	South-East	URBAN	KINH	No	Married	Higher	Having paid work	YES
171998	1	1	1	1	1	85	56	1	MALE	South-East	URBAN	KINH	No	Married	High school	Having paid work	YES
171999	1	1	1	1	1	80	62	1	FEMALE	South-East	RURAL	KINH	No	Married	Secondary school	Student/retired/Having unpaid work	YES
172000	1	1	1	1	1	90	58	1	MALE	South-East	URBAN	KINH	Yes	Married	Secondary school	Having paid work	YES
172001	1	1	1	1	1	99	23	1	MALE	South-East	RURAL	KINH	No	Married	Primary school and lower	Having paid work	YES
172002	1	1	1	1	1	90	18	1	MALE	South-East	RURAL	KINH	Yes	Single	Secondary school	Having paid work	NO
172004	2	1	1	2	2	10	64	0.7831	FEMALE	Mekong river delta	URBAN	KINH	No	Married	Secondary school	Student/retired/Having unpaid work	YES
172005	1	1	1	1	1	80	34	1	MALE	Mekong river delta	URBAN	KINH	No	Married	High school	Having paid work	YES
172016	1	1	1	1	2	80	42	0.9362	MALE	South-East	URBAN	KINH	No	Married	Higher	Having paid work	YES
172017	1	1	1	1	1	80	32	1	MALE	South-East	URBAN	KINH	No	Married	Higher	Having paid work	YES
172018	1	1	1	1	1	95	36	1	MALE	South-East	URBAN	KINH	Yes	Married	Higher	Having paid work	YES
172019	1	1	1	1	1	97	32	1	MALE	South-East	URBAN	KINH	Yes	Married	High school	Having paid work	YES
172020	1	1	1	1	1	80	34	1	MALE	South-East	RURAL	KINH	No	Married	Primary school and lower	Having paid work	NO
172028	1	1	2	1	2	90	26	0.8898	MALE	Mekong river delta	URBAN	KINH	No	Single	Higher	Having paid work	YES
172029	1	1	1	2	1	85	51	0.9161	MALE	Mekong river delta	RURAL	KINH	No	Married	High school	Having paid work	YES
172030	1	1	1	1	2	80	32	0.9362	MALE	South-East	RURAL	KINH	No	Married	Higher	Having paid work	YES
172032	1	1	1	2	1	80	39	0.9161	MALE	South-East	URBAN	KINH	No	Married	Higher	Having paid work	YES
172033	1	1	1	2	1	90	51	0.9161	FEMALE	South-East	RURAL	KINH	No	Married	Primary school and lower	Having paid work	NO
172034	1	1	1	1	1	100	32	1	FEMALE	South-East	RURAL	KINH	No	Married	Secondary school	Student/retired/Having unpaid work	NO
172035	1	1	1	1	1	70	35	1	FEMALE	South-East	RURAL	KINH	No	Married	Primary school and lower	Student/retired/Having unpaid work	YES
172036	1	1	1	1	1	90	31	1	FEMALE	South-East	RURAL	KINH	No	Married	High school	Having paid work	YES
172037	1	1	1	1	1	81	60	1	MALE	South-East	URBAN	KINH	Yes	Married	Primary school and lower	Having paid work	NO
172038	1	1	1	1	1	80	40	1	FEMALE	South-East	RURAL	KINH	Yes	Married	Primary school and lower	Student/retired/Having unpaid work	NO
172039	1	1	1	2	1	70	60	0.9161	FEMALE	South-East	RURAL	OTHER_MINORITY_GROUP_SPECIFY	Yes	Married	Primary school and lower	Student/retired/Having unpaid work	YES
172040	1	1	1	2	2	70	20	0.8523	FEMALE	South-East	RURAL	KINH	No	Single	High school	Having paid work	NO
172041	1	1	1	1	1	90	47	1	FEMALE	South-East	RURAL	KINH	No	Married	High school	Having paid work	YES
172042	1	1	1	1	1	80	37	1	FEMALE	South-East	RURAL	OTHER_MINORITY_GROUP_SPECIFY	No	Single	Higher	Having paid work	YES
172043	1	1	1	1	2	80	23	0.9362	MALE	South-East	RURAL	KINH	No	Single	Higher	Having paid work	NO
172044	1	1	1	2	1	90	22	0.9161	FEMALE	South-East	RURAL	KINH	No	Single	High school	Student/retired/Having unpaid work	YES
172045	1	1	1	1	1	90	29	1	FEMALE	South-East	RURAL	KINH	No	Married	Higher	Having paid work	YES
172046	1	1	1	1	3	80	41	0.8874	MALE	South-East	RURAL	KINH	No	Married	Secondary school	Having paid work	YES
172047	1	1	1	1	1	60	34	1	MALE	South-East	RURAL	KINH	No	Single	Higher	Having paid work	YES
172048	1	1	1	1	1	100	31	1	MALE	South-East	RURAL	KINH	Yes	Married	Secondary school	Having paid work	NO
172049	1	1	1	1	1	70	54	1	FEMALE	Mekong river delta	URBAN	KINH	Yes	Married	Primary school and lower	Having paid work	YES
172052	1	1	1	1	1	95	36	1	FEMALE	South-East	URBAN	KINH	No	Married	Higher	Having paid work	YES
172053	1	1	1	2	1	80	32	0.9161	MALE	South-East	URBAN	KINH	No	Married	Higher	Having paid work	YES
172054	1	1	1	1	1	100	51	1	MALE	South-East	RURAL	KINH	No	Married	High school	Student/retired/Having unpaid work	YES
172055	1	1	1	1	1	80	20	1	FEMALE	South-East	RURAL	KINH	No	Single	High school	Having paid work	YES
172056	1	1	1	1	1	95	51	1	MALE	South-East	RURAL	KINH	Yes	Single	High school	Having paid work	NO
172244	1	1	1	1	1	85	52	1	FEMALE	South-East	URBAN	KINH	Yes	Married	Secondary school	Student/retired/Having unpaid work	YES
172245	1	1	1	2	2	60	22	0.8523	FEMALE	South-East	URBAN	KINH	No	Single	High school	Student/retired/Having unpaid work	YES
172246	1	1	1	2	1	70	19	0.9161	FEMALE	South-East	URBAN	KINH	No	Single	High school	Student/retired/Having unpaid work	YES
172247	1	1	1	1	1	90	24	1	MALE	South-East	URBAN	KINH	No	Single	High school	Having paid work	YES
172248	1	1	1	1	1	80	20	1	MALE	South-East	URBAN	KINH	Yes	Single	High school	Student/retired/Having unpaid work	YES
172249	1	1	1	1	1	99	40	1	FEMALE	South-East	URBAN	KINH	No	Married	Higher	Student/retired/Having unpaid work	YES
172250	1	1	1	2	1	80	43	0.9161	FEMALE	South-East	URBAN	KINH	Yes	Married	High school	Student/retired/Having unpaid work	YES
172251	1	1	1	1	1	95	47	1	FEMALE	South-East	URBAN	KINH	Yes	Married	High school	Having paid work	YES
172253	1	1	1	2	1	70	80	0.9161	FEMALE	South-East	URBAN	KINH	Yes	Divorce/widow/separate/other	Primary school and lower	Student/retired/Having unpaid work	YES
172254	1	1	1	1	2	90	40	0.9362	MALE	South-East	URBAN	KINH	Yes	Married	High school	Having paid work	YES
172255	1	1	1	1	1	90	34	1	MALE	South-East	URBAN	KINH	No	Married	Higher	Having paid work	YES
172256	1	1	1	1	1	60	32	1	MALE	South-East	URBAN	KINH	Yes	Married	Secondary school	Having paid work	YES
172257	1	1	1	2	1	70	58	0.9161	MALE	South-East	URBAN	KINH	Yes	Married	Secondary school	Having paid work	YES
172258	1	1	1	1	1	90	37	1	FEMALE	South-East	RURAL	KINH	Yes	Married	Secondary school	Having paid work	NO
172260	1	1	1	2	1	80	57	0.9161	MALE	South-East	RURAL	KINH	Yes	Married	Secondary school	Having paid work	YES
172261	1	1	1	2	1	80	32	0.9161	FEMALE	South-East	RURAL	KINH	Yes	Married	Secondary school	Having paid work	YES
172262	1	1	1	1	1	70	19	1	FEMALE	South-East	RURAL	KINH	No	Single	High school	Student/retired/Having unpaid work	YES
172743	1	1	1	2	1	95	18	0.9161	FEMALE	South-East	URBAN	KINH	No	Single	High school	Having paid work	YES
172744	2	1	1	2	1	70	19	0.8469	FEMALE	South-East	URBAN	KINH	Yes	Single	High school	Student/retired/Having unpaid work	YES
172745	1	1	1	1	1	90	18	1	MALE	South-East
172746	2	1	1	2	1	70	21	0.8469	FEMALE	South-East	URBAN	KINH	No	Single	High school	Student/retired/Having unpaid work	YES
172747	1	1	1	2	2	97	35	0.8523	MALE	South-East	URBAN	KINH	No	Married	Higher	Having paid work	YES
172748	1	1	1	2	1	70	42	0.9161	FEMALE	South-East	URBAN	KINH	No	Married	High school	Having paid work	YES
172749	1	1	1	1	1	70	59	1	MALE	South-East	URBAN	KINH	Yes	Married	Secondary school	Having paid work	YES
172751	1	1	1	1	1	80	56	1	MALE	South-East	URBAN	KINH	Yes	Married	Secondary school	Having paid work	YES
172752	1	1	1	2	2	70	57	0.8523	FEMALE	South-East	URBAN	KINH	Yes	Married	Secondary school	Student/retired/Having unpaid work	YES
172753	1	1	1	2	1	98	30	0.9161	MALE	South-East	URBAN	KINH	Yes	Married	Higher	Having paid work	YES
172755	1	1	1	1	1	90	46	1	MALE	South-East	URBAN	KINH	No	Married	High school	Having paid work	YES
172756	1	1	1	2	1	90	50	0.9161	FEMALE	South-East	RURAL	KINH	Yes	Married	Higher	Having paid work	YES
172757	1	1	1	2	1	70	36	0.9161	FEMALE	South-East	RURAL	KINH	Yes	Married	Secondary school	Student/retired/Having unpaid work	NO
172758	1	1	1	1	1	90	22	1	FEMALE	South-East	RURAL	KINH	No	Married	Secondary school	Having paid work	YES
172759	1	1	1	2	1	90	44	0.9161	MALE	South-East	RURAL	KINH	Yes	Married	Higher	Having paid work	NO
172761	1	1	1	1	1	80	26	1	MALE	South-East	RURAL	KINH	No	Married	Secondary school	Having paid work	YES
172762	1	1	1	1	1	80	65	1	FEMALE	South-East	RURAL	KINH	Yes	Married	Primary school and lower	Student/retired/Having unpaid work	YES
172770	1	1	1	1	1	90	50	1	FEMALE	South-East	RURAL	KINH	Yes	Married	Primary school and lower	Having paid work	YES
172771	1	1	1	2	1	70	38	0.9161	FEMALE	South-East	RURAL	KINH	No	Married	Secondary school	Having paid work	YES
172772	1	1	1	1	1	100	27	1	FEMALE	South-East	RURAL	KINH	No	Divorce/widow/separate/other	Higher	Having paid work	YES
172773	2	1	2	3	2	70	60	0.6685	MALE	South-East	RURAL	KINH	No	Married	Secondary school	Having paid work	YES
172774	1	1	1	1	2	80	33	0.9362	MALE	South-East	RURAL	KINH	No	Single	Higher	Having paid work	YES
172775	1	1	1	1	1	80	71	1	FEMALE	South-East	RURAL	KINH	Yes	Married	Primary school and lower	Student/retired/Having unpaid work	YES
172776	1	1	2	2	2	50	26	0.8059	MALE	South-East	URBAN	KINH	No	Single	Primary school and lower	Having paid work	NO
172777	1	1	1	2	1	70	32	0.9161	FEMALE	South-East	URBAN	KINH	No	Married	Higher	Having paid work	YES
172778	1	1	1	2	2	80	58	0.8523	FEMALE	South-East	URBAN	KINH	Yes	Married	Secondary school	Student/retired/Having unpaid work	YES
172779	3	2	2	3	3	55	66	0.5676	FEMALE	South-East	URBAN	KINH	No	Divorce/widow/separate/other	Higher	Having paid work	YES
172780	1	1	1	2	1	70	39	0.9161	MALE	South-East	URBAN	KINH	No	Married	Higher	Having paid work	YES
172781	1	1	1	1	1	90	36	1	MALE	South-East	URBAN	KINH	No	Married	High school	Having paid work	YES
172782	1	1	1	1	1	100	57	1	MALE	South-East	URBAN	KINH	No	Married	Secondary school	Student/retired/Having unpaid work	YES
172783	1	1	1	1	2	95	32	0.9362	MALE	South-East	URBAN	KINH	No	Single	Higher	Having paid work	YES
172784	1	1	2	1	1	99	31	0.9536	MALE	South-East	URBAN	KINH	No	Married	Higher	Having paid work	YES
172785	1	1	1	2	1	70	58	0.9161	MALE	South-East	RURAL	KINH	No	Married	Primary school and lower	Having paid work	YES
172786	1	1	1	1	1	90	20	1	FEMALE	South-East	RURAL	KINH	No	Divorce/widow/separate/other	Primary school and lower	Having paid work	YES
172787	1	1	1	2	1	70	54	0.9161	MALE	South-East	RURAL	KINH	No	Married	Higher	Having paid work	YES
172788	1	1	1	2	1	80	18	0.9161	FEMALE	South-East	RURAL	KINH	No	Single	High school	Student/retired/Having unpaid work	YES
172789	1	1	1	1	4	100	48	0.8287	FEMALE	South-East	RURAL	KINH	No	Married	Primary school and lower	Having paid work	YES
172790	2	1	1	2	1	80	53	0.8469	FEMALE	South-East	RURAL	KINH	No	Married	Primary school and lower	Student/retired/Having unpaid work	YES
172791	1	1	1	1	1	80	18	1	MALE	South-East	RURAL	KINH	No	Single	High school	Having paid work	YES
172792	1	1	1	2	3	70	61	0.8035	FEMALE	Mekong river delta	URBAN	KINH	No	Married	Primary school and lower	Student/retired/Having unpaid work	NO
172793	1	1	1	2	1	90	45	0.9161	MALE	Mekong river delta	URBAN	KINH	No	Married	Primary school and lower	Having paid work	NO
172794	1	1	1	1	1	100	30	1	MALE	Mekong river delta	URBAN	KINH	No	Married	High school	Having paid work	YES
172795	1	1	1	3	1	90	26	0.8479	MALE	Mekong river delta	URBAN	KINH	No	Single	Primary school and lower	Having paid work	YES
172804	1	1	1	2	1	80	29	0.9161	FEMALE	South-East	RURAL	KINH	Yes	Married	Primary school and lower	Having paid work	YES
172805	1	1	1	1	1	60	19	1	MALE	South-East	RURAL	OTHER_MINORITY_GROUP_SPECIFY	No	Single	Primary school and lower	Having paid work	YES
172806	1	1	1	1	1	90	19	1	MALE	South-East	RURAL	KINH	Yes	Single	Primary school and lower	Having paid work	NO
172807	1	1	1	1	1	90	43	1	MALE	South-East	RURAL	KINH	No	Married	High school	Having paid work	YES
172808	1	1	1	1	1	100	31	1	FEMALE	Mekong river delta	URBAN	KINH	No	Married	Primary school and lower	Student/retired/Having unpaid work	NO
172809	1	1	1	2	1	90	37	0.9161	MALE	Mekong river delta	URBAN	KINH	No	Divorce/widow/separate/other	Primary school and lower	Having paid work	NO
172810	1	1	1	2	5	50	27	0.6773	FEMALE	Mekong river delta	URBAN	KINH	No	Single	Secondary school	Having paid work	NO
172811	2	1	1	2	1	70	65	0.8469	FEMALE	Mekong river delta	URBAN	KINH	Yes	Married	High school	Student/retired/Having unpaid work	YES
172812	1	1	1	1	2	65	60	0.9362	MALE	Mekong river delta	URBAN	KINH	No	Married	Higher	Having paid work	YES
172813	1	1	1	1	1	90	34	1	FEMALE	Mekong river delta	URBAN	KINH	Yes	Divorce/widow/separate/other	Higher	Having paid work	YES
172814	1	1	1	1	1	90	19	1	MALE	Mekong river delta	URBAN	KINH	Yes	Single	High school	Student/retired/Having unpaid work	YES
172815	1	1	1	2	1	50	55	0.9161	MALE	Mekong river delta	RURAL	KINH	Yes	Married	Primary school and lower	Having paid work	YES
172816	2	1	1	2	1	75	44	0.8469	MALE	South-East	RURAL	KINH	No	Married	Secondary school	Having paid work	NO
172817	1	1	1	1	1	80	44	1	MALE	South-East	RURAL	KINH	No	Married	Secondary school	Having paid work	NO
172818	1	1	1	1	1	80	61	1	MALE	South-East	RURAL	KINH	No	Married	Secondary school	Student/retired/Having unpaid work	YES
172819	1	1	1	1	1	100	25	1	FEMALE	Mekong river delta	URBAN	KINH	No	Married	High school	Having paid work	YES
172820	1	1	1	1	1	100	27	1	MALE	Mekong river delta	URBAN	KINH	No	Married	Secondary school	Having paid work	NO
172821	1	1	1	2	1	90	38	0.9161	MALE	Mekong river delta	URBAN	KINH	No	Married	Primary school and lower	Having paid work	YES
172822	2	1	1	1	1	98	28	0.9308	FEMALE	Mekong river delta	RURAL	KINH	No	Married	Higher	Student/retired/Having unpaid work	NO
172823	1	1	1	1	1	100	62	1	FEMALE	Mekong river delta	RURAL	KINH	No	Married	Higher	Student/retired/Having unpaid work	YES
172824	1	1	1	2	1	80	43	0.9161	MALE	Mekong river delta	RURAL	KINH	No	Married	Higher	Having paid work	YES
172825	1	1	1	1	1	90	18	1	FEMALE	Mekong river delta	RURAL	KINH	No	Single	High school	Student/retired/Having unpaid work	YES
172826	2	1	1	2	2	70	41	0.7831	FEMALE	Mekong river delta	RURAL	KINH	Yes	Married	Secondary school	Having paid work	YES
172839	1	1	1	1	2	80	60	0.9362	MALE	Mekong river delta	URBAN	KINH	No	Married	Primary school and lower	Having paid work	NO
172840	1	1	1	1	1	90	52	1	FEMALE	Mekong river delta	URBAN	KINH	Yes	Married	Primary school and lower	Having paid work	YES
172841	2	1	1	2	2	60	65	0.7831	MALE	Mekong river delta	RURAL	KINH	Yes	Married	Secondary school	Having paid work	YES
172842	1	1	1	1	1	90	32	1	FEMALE	South-East	URBAN	KINH	Yes	Married	Secondary school	Having paid work	NO
172844	1	1	1	1	2	90	40	0.9362	MALE	South-East	URBAN	KINH	Yes	Single	High school	Having paid work	YES
172845	1	1	1	1	2	90	49	0.9362	MALE	South-East	URBAN	KINH	Yes	Married	Primary school and lower	Having paid work	YES
172846	1	1	1	1	2	70	60	0.9362	MALE	South-East	URBAN	KINH	Yes	Married	Secondary school	Having paid work	YES
172848	1	1	1	1	1	85	43	1	MALE	South-East	URBAN	KINH	Yes	Married	Primary school and lower	Having paid work	YES
172849	1	1	1	1	1	90	27	1	FEMALE	South-East	RURAL	KINH	Yes	Married	Secondary school	Having paid work	YES
172850	1	1	1	1	1	100	36	1	FEMALE	South-East	RURAL	KINH	Yes	Married	Primary school and lower	Having paid work	YES
172851	1	1	1	2	1	60	44	0.9161	FEMALE	South-East	RURAL	KINH	Yes	Single	High school	Having paid work	YES
172852	1	1	1	1	1	80	24	1	FEMALE	South-East	RURAL	KINH	No	Single	Higher	Having paid work	NO
172853	1	1	1	1	1	80	54	1	MALE	South-East	RURAL	KINH	No	Married	Secondary school	Having paid work	YES
172854	1	1	1	1	2	70	37	0.9362	MALE	South-East	RURAL	KINH	No	Married	Primary school and lower	Having paid work	YES
172855	1	1	1	1	1	50	47	1	FEMALE	South-East	RURAL	KINH	Yes	Married	Primary school and lower	Having paid work	NO
172856	1	1	1	1	1	85	19	1	MALE	South-East	RURAL	KINH	No	Single	High school	Student/retired/Having unpaid work	YES
172857	1	1	1	1	1	100	20	1	MALE	South-East	RURAL	KINH	No	Single	High school	Having paid work	YES
172858	1	1	1	2	1	70	33	0.9161	FEMALE	Mekong river delta	URBAN	KINH	No	Married	Primary school and lower	Having paid work	NO
172859	1	1	1	2	1	60	43	0.9161	FEMALE	Mekong river delta	URBAN	KINH	No	Married	Primary school and lower	Having paid work	YES
172860	1	1	1	1	1	100	32	1	FEMALE	Mekong river delta	URBAN	KINH	No	Married	Primary school and lower	Student/retired/Having unpaid work	NO
172861	1	1	1	1	1	80	59	1	MALE	Mekong river delta	URBAN	KINH	No	Married	Higher	Student/retired/Having unpaid work	YES
172862	1	1	1	2	1	70	60	0.9161	MALE	Mekong river delta	RURAL	KINH	Yes	Married	Primary school and lower	Having paid work	YES
172863	1	1	1	1	1	80	26	1	FEMALE	Mekong river delta	RURAL	KINH	No	Married	Primary school and lower	Student/retired/Having unpaid work	YES
172864	1	1	1	1	1	90	39	1	FEMALE	Mekong river delta	RURAL	KINH	Yes	Married	Higher	Having paid work	YES
172865	1	1	1	1	1	90	19	1	FEMALE	Mekong river delta	RURAL	KINH	No	Married	Secondary school	Student/retired/Having unpaid work	YES
172866	1	1	1	1	1	95	23	1	MALE	Mekong river delta	RURAL	KINH	No	Married	Primary school and lower	Having paid work	YES
172867	1	1	1	1	1	99	31	1	FEMALE	Mekong river delta	RURAL	KINH	No	Married	Higher	Having paid work	YES
172868	1	1	1	1	1	100	29	1	MALE	Mekong river delta	URBAN	KINH	No	Divorce/widow/separate/other	Secondary school	Having paid work	YES
172869	1	1	1	2	1	80	20	0.9161	MALE	Mekong river delta	URBAN	KINH	No	Single	Primary school and lower	Having paid work	YES
172870	1	1	1	2	2	80	44	0.8523	MALE	Mekong river delta	URBAN	KINH	No	Married	High school	Having paid work	YES
172871	1	1	1	1	2	80	39	0.9362	MALE	Mekong river delta	RURAL	KINH	No	Married	Secondary school	Having paid work	NO
172872	2	1	1	2	1	70	36	0.8469	MALE	Mekong river delta	RURAL	KINH	Yes	Married	Secondary school	Having paid work	YES
172873	2	1	1	2	1	50	60	0.8469	FEMALE	Mekong river delta	URBAN	KINH	No	Married	Primary school and lower	Having paid work	YES
172874	1	1	1	1	1	90	29	1	MALE	Mekong river delta	URBAN	KINH	No	Single	Primary school and lower	Having paid work	NO
172875	1	1	1	2	1	60	36	0.9161	MALE	Mekong river delta	URBAN	KINH	No	Married	Primary school and lower	Having paid work	NO
172876	1	1	1	1	1	80	46	1	MALE	Mekong river delta	URBAN	KINH	No	Married	Secondary school	Having paid work	YES
172877	1	1	1	1	1	100	40	1	FEMALE	Mekong river delta	URBAN	KINH	No	Married	Primary school and lower	Having paid work	NO
172878	1	1	1	1	1	90	27	1	FEMALE	Mekong river delta	URBAN	KINH	No	Married	Secondary school	Having paid work	YES
172879	1	1	1	1	1	80	22	1	MALE	Mekong river delta	URBAN	KINH	Yes	Married	Secondary school	Having paid work	YES
172882	1	1	1	2	1	70	39	0.9161	FEMALE	Mekong river delta	RURAL	KINH	Yes	Married	High school	Having paid work	NO
172884	1	1	1	1	1	90	25	1	FEMALE	Mekong river delta	URBAN	KINH	No	Married	Secondary school	Student/retired/Having unpaid work	NO
172885	1	1	1	1	1	100	29	1	FEMALE	Mekong river delta	URBAN	KINH	No	Married	High school	Having paid work	NO
172886	1	1	1	2	1	70	45	0.9161	FEMALE	Mekong river delta	URBAN	KINH	No	Married	Secondary school	Student/retired/Having unpaid work	NO
172887	1	1	1	2	1	100	37	0.9161	FEMALE	Mekong river delta	RURAL	KINH	No	Married	Primary school and lower	Having paid work	YES
172888	2	1	1	2	1	70	53	0.8469	MALE	Mekong river delta	RURAL	KINH	Yes	Married	Higher	Having paid work	YES
172889	1	1	1	2	1	80	21	0.9161	FEMALE	Mekong river delta	RURAL	KINH	No	Single	High school	Student/retired/Having unpaid work	YES
173223	1	1	1	1	1	90	19	1	MALE	Mekong river delta	URBAN	KINH	No	Single	High school	Having paid work	NO
173224	1	1	1	1	1	80	77	1	MALE	Mekong river delta	RURAL	KINH	Yes	Married	Primary school and lower	Having paid work	YES
173225	1	1	1	4	1	50	45	0.73	FEMALE	Mekong river delta	RURAL	KINH	No	Married	Primary school and lower	Student/retired/Having unpaid work	YES
173226	1	1	1	1	1	80	62	1	MALE	Mekong river delta	RURAL	KINH	No	Married	Primary school and lower	Having paid work	YES
173227	1	1	1	2	1	60	39	0.9161	FEMALE	Mekong river delta	RURAL	KINH	No	Married	Primary school and lower	Student/retired/Having unpaid work	YES
173228	1	1	1	1	1	90	27	1	MALE	Mekong river delta	RURAL	KINH	No	Single	Higher	Having paid work	NO
173229	1	1	1	1	1	90	20	1	FEMALE	Mekong river delta	RURAL	KINH	No	Single	High school	Student/retired/Having unpaid work	YES
173230	1	1	1	1	1	90	63	1	MALE	South-East	RURAL	KINH	No	Married	Secondary school	Student/retired/Having unpaid work	YES
173231	1	1	1	1	1	85	18	1	MALE	South-East	RURAL	OTHER_MINORITY_GROUP_SPECIFY	No	Single	Higher	Student/retired/Having unpaid work	YES
173232	1	1	1	1	1	79	35	1	FEMALE	South-East	RURAL	KINH	Yes	Married	Secondary school	Having paid work	YES
173233	1	1	1	1	1	95	27	1	MALE	South-East	RURAL	KINH	Yes	Single	Higher	Having paid work	YES
173234	1	1	1	1	2	95	25	0.9362	MALE	South-East	RURAL	KINH	Yes	Single	Higher	Having paid work	YES
173235	1	1	1	1	1	90	45	1	FEMALE	South-East	RURAL	KINH	No	Married	High school	Having paid work	YES
173236	1	1	1	1	1	78	42	1	MALE	South-East	RURAL	OTHER_MINORITY_GROUP_SPECIFY	Yes	Married	Primary school and lower	Having paid work	NO
173237	1	1	1	1	1	50	60	1	FEMALE	South-East	RURAL	KINH	No	Divorce/widow/separate/other	Higher	Having paid work	YES
173238	1	1	1	1	1	90	53	1	FEMALE	Mekong river delta	URBAN	KINH	Yes	Married	Primary school and lower	Having paid work	YES
173239	1	1	1	1	1	90	19	1	FEMALE	Mekong river delta	URBAN	KINH	No	Single	High school	Student/retired/Having unpaid work	YES
173240	1	1	1	1	1	80	41	1	FEMALE	Mekong river delta	URBAN	KINH	Yes	Married	Secondary school	Having paid work	YES
173241	1	1	1	1	1	95	22	1	FEMALE	Mekong river delta	URBAN	KINH	No	Single	Higher	Having paid work	YES
173242	1	1	1	1	2	90	24	0.9362	FEMALE	Mekong river delta	URBAN	KINH	No	Married	Higher	Having paid work	YES
173243	1	1	1	1	1	95	22	1	MALE	Mekong river delta	URBAN	KINH	No	Single	Higher	Having paid work	YES
173244	1	1	1	1	1	90	27	1	FEMALE	Mekong river delta	URBAN	KINH	Yes	Married	Higher	Having paid work	YES
173245	1	1	1	2	1	80	75	0.9161	MALE	Mekong river delta	RURAL	KINH	Yes	Married	Primary school and lower	Having paid work	YES
173246	1	1	1	1	1	70	57	1	FEMALE	Mekong river delta	RURAL	KINH	Yes	Married	Primary school and lower	Having paid work	YES
173247	2	1	1	1	1	40	76	0.9308	MALE	Mekong river delta	RURAL	KINH	No	Married	Primary school and lower	Unable to work/ Unemployed	YES
173248	1	1	1	1	1	90	39	1	FEMALE	Mekong river delta	RURAL	KINH	No	Married	Primary school and lower	Having paid work	YES
173249	1	1	1	1	1	80	45	1	FEMALE	Mekong river delta	RURAL	KINH	Yes	Single	Secondary school	Having paid work	YES
173250	1	1	1	1	1	95	32	1	FEMALE	South-East	RURAL	KINH	No	Married	Secondary school	Having paid work	NO
173251	1	1	1	1	1	100	21	1	MALE	South-East	RURAL	KINH	Yes	Single	Higher	Student/retired/Having unpaid work	YES
173252	1	2	2	2	1	50	56	0.8269	FEMALE	South-East	RURAL	KINH	No	Married	Higher	Having paid work	YES
173253	1	1	1	1	1	80	21	1	MALE	South-East	RURAL	OTHER_MINORITY_GROUP_SPECIFY	Yes	Married	Primary school and lower	Having paid work	NO
173254	1	1	2	2	1	70	65	0.8697	FEMALE	South-East	RURAL	KINH	No	Married	Secondary school	Student/retired/Having unpaid work	YES
173255	1	1	1	2	1	70	64	0.9161	MALE	Mekong river delta	URBAN	KINH	Yes	Married	Secondary school	Student/retired/Having unpaid work	YES
173256	1	1	1	1	1	80	36	1	MALE	Mekong river delta	URBAN	KINH	No	Married	Primary school and lower	Having paid work	YES
173257	2	1	1	2	2	70	49	0.7831	FEMALE	Mekong river delta	URBAN	KINH	Yes	Married	High school	Student/retired/Having unpaid work	YES
173258	1	1	1	1	1	100	37	1	FEMALE	Mekong river delta	URBAN	KINH	Yes	Married	Secondary school	Having paid work	YES
173259	1	1	1	2	1	80	36	0.9161	FEMALE	Mekong river delta	URBAN	KINH	Yes	Married	Higher	Having paid work	YES
173260	1	1	1	1	1	60	50	1	MALE	Mekong river delta	URBAN	KINH	No	Married	High school	Having paid work	NO
173261	1	1	1	1	1	80	28	1	MALE	Mekong river delta	URBAN	KINH	No	Married	High school	Having paid work	YES
173262	1	1	1	1	1	90	43	1	FEMALE	Mekong river delta	RURAL	KINH	No	Married	Secondary school	Having paid work	YES
173263	1	1	1	4	4	90	48	0.5587	FEMALE	Mekong river delta	RURAL	KINH	No	Married	Primary school and lower	Having paid work	YES
173264	1	1	1	4	1	50	49	0.73	FEMALE	Mekong river delta	RURAL	KINH	Yes	Married	Secondary school	Having paid work	YES
173265	1	1	1	1	1	100	33	1	FEMALE	Mekong river delta	RURAL	KINH	No	Single	Higher	Having paid work	YES
173266	1	1	1	1	1	70	37	1	FEMALE	Mekong river delta	RURAL	KINH	No	Married	Higher	Having paid work	YES
173267	1	1	1	1	2	80	50	0.9362	FEMALE	Mekong river delta	RURAL	KINH	No	Married	Secondary school	Having paid work	YES
173268	1	1	1	1	1	70	29	1	FEMALE	Mekong river delta	RURAL	KINH	Yes	Married	Primary school and lower	Having paid work	NO
173269	1	1	1	1	1	90	40	1	FEMALE	Mekong river delta	RURAL	KINH	No	Married	Higher	Having paid work	YES
173270	1	1	1	1	1	90	34	1	FEMALE	Mekong river delta	RURAL	KINH	No	Married	High school	Having paid work	YES
173271	1	1	1	1	1	90	39	1	FEMALE	Mekong river delta	RURAL	KINH	No	Married	Primary school and lower	Having paid work	YES
173272	1	1	1	1	1	97	59	1	MALE	Mekong river delta	RURAL	KINH	No	Married	Primary school and lower	Having paid work	YES
173273	2	1	1	2	1	99	44	0.8469	FEMALE	Mekong river delta	RURAL	KINH	No	Married	Secondary school	Having paid work	YES
173274	1	1	1	2	1	70	35	0.9161	FEMALE	Mekong river delta	RURAL	KINH	No	Married	Higher	Having paid work	YES
173275	1	1	1	1	1	90	29	1	FEMALE	Mekong river delta	RURAL	KINH	No	Married	Higher	Having paid work	NO
173276	1	1	1	2	2	100	27	0.8523	FEMALE	Mekong river delta	RURAL	KINH	No	Married	Secondary school	Student/retired/Having unpaid work	YES
173277	1	1	1	1	2	90	28	0.9362	FEMALE	Mekong river delta	RURAL	KINH	Yes	Married	Higher	Student/retired/Having unpaid work	YES
173278	1	1	1	1	1	90	22	1	FEMALE	Mekong river delta	RURAL	KINH	No	Married	Higher	Student/retired/Having unpaid work	NO
173279	1	1	1	1	1	90	22	1	FEMALE	Mekong river delta	RURAL	KINH	No	Single	Higher	Having paid work	YES
173281	1	1	1	1	1	90	49	1	FEMALE	Mekong river delta	RURAL	KINH	No	Married	Primary school and lower	Having paid work	YES
173282	1	1	1	1	1	80	75	1	MALE	Mekong river delta	RURAL	KINH	No	Married	Secondary school	Unable to work/ Unemployed	YES
173283	1	1	1	1	1	90	34	1	MALE	Mekong river delta	RURAL	KINH	No	Single	Secondary school	Having paid work	YES
173284	1	1	1	2	1	90	49	0.9161	MALE	Mekong river delta	RURAL	KINH	No	Married	Higher	Having paid work	YES
173285	1	1	1	1	1	90	28	1	MALE	Mekong river delta	URBAN	KINH	No	Single	Secondary school	Student/retired/Having unpaid work	NO
173286	1	1	1	1	1	100	41	1	FEMALE	Mekong river delta	RURAL	KINH	Yes	Married	Secondary school	Having paid work	YES
173287	1	1	1	2	1	70	68	0.9161	MALE	Mekong river delta	RURAL	KINH	No	Married	Higher	Student/retired/Having unpaid work	YES
173288	1	1	1	1	1	80	27	1	FEMALE	Mekong river delta	RURAL	KINH	No	Married	Primary school and lower	Student/retired/Having unpaid work	NO
173290	1	1	1	1	1	90	50	1	FEMALE	Mekong river delta	RURAL	KINH	Yes	Married	High school	Having paid work	YES
173291	1	1	1	1	2	70	60	0.9362	MALE	Mekong river delta	RURAL	KINH	No	Married	Higher	Student/retired/Having unpaid work	YES
173292	1	1	1	1	1	100	30	1	FEMALE	Mekong river delta	RURAL	KINH	No	Married	Higher	Student/retired/Having unpaid work	YES
173293	1	1	1	1	1	90	32	1	FEMALE	Mekong river delta	RURAL	KINH	No	Married	High school	Having paid work	NO
173294	1	1	1	2	1	90	21	0.9161	MALE	Mekong river delta	RURAL	KINH	No	Single	High school	Student/retired/Having unpaid work	YES
173295	2	1	2	3	4	70	57	0.561	FEMALE	Mekong river delta	RURAL	KINH	Yes	Married	Primary school and lower	Student/retired/Having unpaid work	YES
173296	1	1	1	1	1	100	39	1	MALE	Mekong river delta	RURAL	KINH	No	Married	Higher	Having paid work	YES
173297	1	1	1	1	2	70	39	0.9362	FEMALE	Mekong river delta	RURAL	KINH	No	Married	Primary school and lower	Having paid work	YES
173298	1	1	1	2	1	80	29	0.9161	FEMALE	Mekong river delta	RURAL	KINH	Yes	Married	Secondary school	Having paid work	NO
173299	1	1	1	1	1	80	26	1	MALE	Mekong river delta	RURAL	KINH	No	Single	Higher	Student/retired/Having unpaid work	YES
173300	1	1	1	1	1	80	37	1	FEMALE	Mekong river delta	RURAL	KINH	No	Married	High school	Having paid work	YES
173301	2	1	1	2	1	80	65	0.8469	FEMALE	Mekong river delta	RURAL	KINH	No	Married	Secondary school	Student/retired/Having unpaid work	YES
173302	1	1	1	1	1	90	53	1	MALE	Mekong river delta	RURAL	KINH	Yes	Married	High school	Having paid work	YES
173303	1	1	1	1	1	70	19	1	FEMALE	Mekong river delta	RURAL	KINH	No	Single	High school	Student/retired/Having unpaid work	YES
173304	1	1	1	1	1	80	36	1	FEMALE	Mekong river delta	RURAL	KINH	Yes	Married	Primary school and lower	Having paid work	NO
173305	1	1	1	1	1	85	19	1	FEMALE	Mekong river delta	RURAL	KINH	Yes	Single	High school	Student/retired/Having unpaid work	YES
173306	1	1	1	1	1	80	80	1	FEMALE	Mekong river delta	RURAL	KINH	Yes	Married	Primary school and lower	Unable to work/ Unemployed	YES
173307	1	1	1	1	2	80	65	0.9362	FEMALE	Mekong river delta	RURAL	KINH	Yes	Married	Primary school and lower	Student/retired/Having unpaid work	YES
173308	1	1	1	1	1	95	34	1	MALE	Mekong river delta	RURAL	KINH	No	Married	High school	Having paid work	YES
173309	1	1	1	1	1	90	47	1	MALE	Mekong river delta	RURAL	KINH	Yes	Married	Secondary school	Having paid work	YES
173310	1	1	1	1	1	96	30	1	FEMALE	Mekong river delta	RURAL	KINH	No	Married	Secondary school	Having paid work	NO
173311	1	1	1	1	1	90	29	1	FEMALE	Mekong river delta	RURAL	KINH	No	Married	Higher	Student/retired/Having unpaid work	YES
173312	1	1	1	2	1	80	53	0.9161	MALE	Mekong river delta	RURAL	KINH	No	Married	Higher	Having paid work	YES
173313	1	1	1	1	1	85	38	1	FEMALE	Mekong river delta	RURAL	KINH	No	Married	High school	Having paid work	YES
173314	1	1	1	1	1	95	34	1	MALE	Mekong river delta	RURAL	KINH	No	Single	Higher	Having paid work	YES
173315	1	1	1	1	1	95	28	1	MALE	Mekong river delta	RURAL	KINH	No	Married	Secondary school	Having paid work	YES
173316	1	1	1	1	1	90	29	1	MALE	Mekong river delta	RURAL	KINH	No	Married	Primary school and lower	Having paid work	YES
173317	1	1	1	1	1	99	27	1	FEMALE	Mekong river delta	RURAL	KINH	No	Married	Primary school and lower	Student/retired/Having unpaid work	YES
173318	1	1	1	1	1	90	20	1	MALE	Mekong river delta	RURAL	KINH	No	Single	High school	Student/retired/Having unpaid work	YES
173319	1	1	1	1	1	80	25	1	FEMALE	Mekong river delta	RURAL	KINH	No	Married	Higher	Student/retired/Having unpaid work	YES
173320	1	1	1	1	1	90	26	1	FEMALE	Mekong river delta	RURAL	KINH	No	Married	Secondary school	Having paid work	YES
173321	1	1	1	1	1	90	18	1	MALE	Mekong river delta	RURAL	KINH	No	Single	High school	Having paid work	YES
173322	1	1	1	1	1	70	18	1	MALE	Mekong river delta	RURAL	KINH	No	Single	High school	Student/retired/Having unpaid work	YES
173323	1	1	1	1	1	85	37	1	MALE	Mekong river delta	RURAL	KINH	Yes	Married	High school	Having paid work	YES
173324	1	1	1	1	1	90	42	1	MALE	Mekong river delta	RURAL	KINH	Yes	Divorce/widow/separate/other	Secondary school	Having paid work	NO
173325	1	1	1	1	1	80	43	1	MALE	Mekong river delta	RURAL	KINH	No	Married	Primary school and lower	Having paid work	YES
173326	1	1	1	1	1	90	58	1	MALE	Mekong river delta	RURAL	KINH	No	Married	High school	Having paid work	YES
173327	1	1	1	1	1	100	34	1	FEMALE	Mekong river delta	RURAL	KINH	No	Married	Secondary school	Having paid work	YES
173328	2	1	1	3	2	70	40	0.7149	MALE	Mekong river delta	RURAL	KINH	Yes	Married	Primary school and lower	Having paid work	YES
173332	1	1	1	1	1	100	39	1	FEMALE	Mekong river delta	URBAN	KINH	No	Married	Primary school and lower	Having paid work	YES
173333	1	1	1	1	1	90	54	1	MALE	Mekong river delta	URBAN	KINH	No	Married	Secondary school	Having paid work	YES
173334	1	1	1	1	1	80	48	1	FEMALE	Mekong river delta	URBAN	KINH	No	Married	Secondary school	Student/retired/Having unpaid work	YES
173335	1	1	1	1	1	90	27	1	FEMALE	Mekong river delta	URBAN	KINH	Yes	Married	Higher	Having paid work	YES
173336	1	1	1	1	1	90	47	1	MALE	Mekong river delta	URBAN	KINH	No	Married	High school	Having paid work	YES
173337	1	1	1	2	1	90	53	0.9161	MALE	Mekong river delta	RURAL	KINH	Yes	Married	Higher	Having paid work	YES
173338	1	1	1	1	1	100	27	1	FEMALE	Mekong river delta	RURAL	KINH	No	Married	Primary school and lower	Having paid work	NO
173339	1	1	1	2	1	80	51	0.9161	MALE	Mekong river delta	RURAL	KINH	No	Married	Higher	Having paid work	YES
173340	1	1	1	1	1	80	37	1	FEMALE	Mekong river delta	RURAL	KINH	No	Married	Secondary school	Having paid work	YES
173341	1	1	1	1	1	80	68	1	FEMALE	Mekong river delta	RURAL	KINH	Yes	Divorce/widow/separate/other	Primary school and lower	Having paid work	YES
173342	1	1	1	2	2	70	42	0.8523	FEMALE	Mekong river delta	RURAL	KINH	Yes	Married	Secondary school	Having paid work	YES
173343	1	1	1	2	1	80	24	0.9161	MALE	Mekong river delta	RURAL	KINH	No	Married	Secondary school	Having paid work	YES
173344	3	2	1	2	1	70	64	0.7948	FEMALE	Mekong river delta	RURAL	KINH	No	Divorce/widow/separate/other	Primary school and lower	Student/retired/Having unpaid work	YES
173345	1	1	1	1	4	100	27	0.8287	FEMALE	Mekong river delta	RURAL	KINH	No	Married	Primary school and lower	Having paid work	YES
173346	1	1	2	2	2	50	28	0.8059	FEMALE	Mekong river delta	RURAL	OTHER_MINORITY_GROUP_SPECIFY	Yes	Married	Primary school and lower	Having paid work	YES
173347	1	1	2	1	2	85	28	0.8898	MALE	Mekong river delta	RURAL	KINH	No	Married	High school	Having paid work	YES
173348	1	1	1	1	1	90	32	1	MALE	Mekong river delta	RURAL	KINH	No	Married	Secondary school	Having paid work	NO
173349	1	1	1	1	1	99	50	1	FEMALE	Mekong river delta	RURAL	KINH	Yes	Married	Higher	Having paid work	YES
173350	1	1	1	1	1	90	51	1	MALE	Mekong river delta	RURAL	KINH	No	Married	Secondary school	Having paid work	YES
173351	1	1	1	2	1	80	43	0.9161	MALE	Mekong river delta	RURAL	KINH	No	Married	Secondary school	Having paid work	NO
173352	1	1	1	1	1	90	57	1	FEMALE	Mekong river delta	RURAL	KINH	Yes	Married	High school	Student/retired/Having unpaid work	YES
173353	1	1	1	1	2	80	36	0.9362	FEMALE	Mekong river delta	RURAL	KINH	Yes	Married	Secondary school	Student/retired/Having unpaid work	YES
173354	1	1	1	2	1	85	49	0.9161	MALE	Mekong river delta	RURAL	KINH	Yes	Married	Secondary school	Having paid work	YES
173355	2	1	1	2	2	70	45	0.7831	FEMALE	Mekong river delta	RURAL	KINH	No	Divorce/widow/separate/other	Higher	Having paid work	YES
173356	1	1	1	2	2	70	53	0.8523	FEMALE	Mekong river delta	RURAL	KINH	No	Married	Secondary school	Having paid work	YES
173357	1	1	1	1	1	80	54	1	FEMALE	Mekong river delta	RURAL	KINH	No	Married	Higher	Student/retired/Having unpaid work	YES
173358	1	1	1	1	2	70	24	0.9362	FEMALE	Mekong river delta	RURAL	KINH	No	Married	High school	Student/retired/Having unpaid work	YES
173359	1	1	1	1	1	95	19	1	MALE	Mekong river delta	RURAL	KINH	Yes	Single	High school	Student/retired/Having unpaid work	YES
173360	2	1	1	2	1	70	47	0.8469	FEMALE	Mekong river delta	RURAL	KINH	Yes	Divorce/widow/separate/other	Secondary school	Student/retired/Having unpaid work	YES
173361	1	1	1	1	1	90	63	1	FEMALE	Mekong river delta	RURAL	KINH	Yes	Married	Primary school and lower	Student/retired/Having unpaid work	YES
173362	1	1	1	1	1	90	20	1	MALE	Mekong river delta	RURAL	KINH	No	Single	High school	Student/retired/Having unpaid work	YES
173363	1	1	1	1	1	90	40	1	MALE	Mekong river delta	RURAL	KINH	No	Married	High school	Having paid work	YES
173364	1	1	1	1	2	99	22	0.9362	MALE	Mekong river delta	RURAL	KINH	No	Single	Higher	Student/retired/Having unpaid work	YES
173365	1	1	1	1	1	90	30	1	MALE	Mekong river delta	RURAL	KINH	No	Married	Secondary school	Having paid work	YES
173366	2	1	1	1	2	100	79	0.867	MALE	Mekong river delta	RURAL	KINH	Yes	Married	Primary school and lower	Having paid work	YES
173367	1	1	1	1	1	100	75	1	MALE	Mekong river delta	RURAL	KINH	No	Married	Higher	Student/retired/Having unpaid work	YES
173368	1	1	1	1	1	95	30	1	MALE	Mekong river delta	RURAL	KINH	No	Married	Primary school and lower	Having paid work	YES
173449	1	1	1	1	1	100	38	1	FEMALE	Mekong river delta	RURAL	KINH	No	Married	Primary school and lower	Having paid work	YES
173450	1	1	1	1	2	98	60	0.9362	FEMALE	Mekong river delta	RURAL	KINH	No	Married	Primary school and lower	Having paid work	YES
173451	1	1	1	3	1	100	46	0.8479	FEMALE	Mekong river delta	RURAL	KINH	No	Married	Primary school and lower	Having paid work	YES
173452	1	1	1	1	1	80	26	1	MALE	Mekong river delta	RURAL	KINH	No	Married	Higher	Student/retired/Having unpaid work	YES
173453	1	1	1	1	2	85	19	0.9362	MALE	Mekong river delta	RURAL	KINH	No	Single	High school	Student/retired/Having unpaid work	YES
173454	1	1	1	1	1	70	78	1	MALE	Mekong river delta	RURAL	KINH	No	Married	Primary school and lower	Unable to work/ Unemployed	YES
173455	1	1	1	1	1	80	75	1	MALE	Mekong river delta	RURAL	KINH	No	Married	High school	Unable to work/ Unemployed	YES
173456	1	1	1	2	2	90	20	0.8523	MALE	Mekong river delta	RURAL	KINH	No	Single	Primary school and lower	Having paid work	YES
173457	1	1	1	1	1	80	30	1	MALE	Mekong river delta	RURAL	KINH	No	Married	Secondary school	Having paid work	YES
173458	2	1	1	2	2	50	53	0.7831	FEMALE	Mekong river delta	RURAL	KINH	Yes	Married	Primary school and lower	Having paid work	YES
173459	1	1	1	1	1	99	28	1	FEMALE	Mekong river delta	RURAL	KINH	No	Married	Primary school and lower	Student/retired/Having unpaid work	YES
173460	1	1	1	2	1	80	41	0.9161	MALE	Mekong river delta	RURAL	KINH	Yes	Married	Primary school and lower	Having paid work	YES
173461	1	1	1	1	2	80	41	0.9362	MALE	Mekong river delta	RURAL	KINH	No	Married	Secondary school	Having paid work	NO
173462	1	1	1	1	1	100	27	1	MALE	Mekong river delta	RURAL	KINH	No	Married	Higher	Having paid work	YES
173463	1	1	1	1	1	100	24	1	MALE	Mekong river delta	RURAL	KINH	Yes	Single	Primary school and lower	Having paid work	YES
173467	2	1	1	1	1	95	75	0.9308	MALE	Mekong river delta	RURAL	KINH	No	Married	Higher	Student/retired/Having unpaid work	YES
173468	1	1	1	1	1	85	28	1	MALE	Mekong river delta	RURAL	KINH	No	Married	Higher	Having paid work	YES
173469	1	1	1	1	1	100	42	1	MALE	Mekong river delta	RURAL	KINH	No	Married	Primary school and lower	Having paid work	YES
173470	1	1	1	1	1	80	24	1	MALE	Mekong river delta	RURAL	KINH	No	Single	Higher	Student/retired/Having unpaid work	YES
173474	1	1	1	1	2	80	40	0.9362	MALE	Mekong river delta	RURAL	KINH	No	Married	High school	Having paid work	YES
173476	1	1	1	1	1	85	18	1	MALE	Mekong river delta	RURAL	KINH	No	Single	Secondary school	Student/retired/Having unpaid work	NO
173477	1	1	1	1	2	80	25	0.9362	MALE	Mekong river delta	RURAL	KINH	No	Single	Higher	Having paid work	YES
173481	1	1	1	2	2	80	26	0.8523	FEMALE	Mekong river delta	RURAL	KINH	No	Married	Higher	Student/retired/Having unpaid work	YES
173482	1	1	1	1	1	97	23	1	FEMALE	Mekong river delta	RURAL	KINH	No	Married	Primary school and lower	Student/retired/Having unpaid work	YES
173483	1	1	1	2	2	100	29	0.8523	MALE	Mekong river delta	RURAL	KINH	No	Married	Primary school and lower	Having paid work	NO
173484	1	1	1	1	1	70	24	1	FEMALE	Mekong river delta	RURAL	KINH	No	Single	Secondary school	Having paid work	YES
173485	1	1	1	2	1	80	47	0.9161	FEMALE	Mekong river delta	RURAL	KINH	No	Married	Secondary school	Having paid work	NO
173486	2	1	1	2	1	50	80	0.8469	MALE	Mekong river delta	RURAL	KINH	Yes	Divorce/widow/separate/other	Secondary school	Unable to work/ Unemployed	YES
173487	1	1	1	1	1	95	44	1	MALE	Mekong river delta	RURAL	KINH	No	Married	High school	Having paid work	NO
173488	1	1	1	1	1	90	24	1	MALE	Mekong river delta	RURAL	KINH	No	Single	High school	Having paid work	YES
173492	1	1	1	1	1	80	47	1	MALE	Mekong river delta	RURAL	KINH	Yes	Married	Secondary school	Having paid work	YES
173493	1	1	1	1	1	100	41	1	MALE	Mekong river delta	RURAL	KINH	No	Married	Secondary school	Having paid work	NO
173494	1	1	1	1	1	80	32	1	MALE	Mekong river delta	RURAL	KINH	No	Married	Secondary school	Having paid work	NO
173495	1	1	1	1	1	80	24	1	MALE	Mekong river delta	RURAL	KINH	No	Married	Secondary school	Having paid work	NO
173499	1	1	1	2	1	80	67	0.9161	FEMALE	Mekong river delta	RURAL	KINH	No	Married	Secondary school	Student/retired/Having unpaid work	YES
173500	1	1	1	1	1	70	58	1	MALE	Mekong river delta	RURAL	KINH	No	Married	Primary school and lower	Having paid work	YES
173501	1	1	1	2	2	80	33	0.8523	MALE	Mekong river delta	RURAL	KINH	Yes	Married	Secondary school	Having paid work	NO
173502	1	1	1	1	1	50	36	1	MALE	Mekong river delta	RURAL	KINH	No	Married	Primary school and lower	Having paid work	NO
173503	1	1	1	1	1	80	80	1	MALE	Mekong river delta	RURAL	KINH	Yes	Married	Primary school and lower	Student/retired/Having unpaid work	YES
173505	1	1	1	1	1	90	41	1	MALE	Mekong river delta	RURAL	KINH	Yes	Married	Primary school and lower	Having paid work	YES
173506	1	1	1	1	1	100	25	1	MALE	Mekong river delta	RURAL	KINH	Yes	Single	Secondary school	Having paid work	NO
173521	2	1	1	2	1	60	82	0.8469	MALE	Mekong river delta	RURAL	KINH	No	Married	Primary school and lower	Unable to work/ Unemployed	YES
173550	2	1	1	2	1	80	75	0.8469	MALE	Mekong river delta	RURAL	KINH	No	Married	Higher	Student/retired/Having unpaid work	YES
173605	1	1	1	1	1	90	26	1	MALE	Mekong river delta	RURAL	KINH	No	Single	Secondary school	Having paid work	NO
173794	1	1	1	1	1	90	76	1	FEMALE	Mekong river delta	RURAL	KINH	Yes	Divorce/widow/separate/other	Primary school and lower	Unable to work/ Unemployed	YES

## Sheet: Know-groups validity
id	Ethnicity (1=Kinh, 2= Minority)	occu	age	age group	sex	edu	marital	bmi	# of comorbidity	vas	mo	sc	ua	pd	ad	value	known
1283	1	Yes	65.5644	>=60	Male	High school or above	Married	17.9282	0	60	1	1	1	1	1	1	Yes-un-diagnosed
1277	1	Yes	68.5644	>=60	Male	Secondary	Married	18.3391	0	80	1	1	1	1	1	1	Yes
3926	1	Yes	63.5452	>=60	Male	High school or above	Married	23.7118	1	90	1	1	1	2	2	0.8523	Yes-un-diagnosed
1116	1	No	60.5699	>=60	Male	Secondary	Married	18.3655	0	100	1	1	1	1	1	1	Yes
1139	1	Yes	48.5616	40-49	Female	Secondary	Married	24.0346	0	80	1	1	1	1	1	1	No
3940	1	Yes	86.5589	>=60	Female	Secondary	Divorced	16.4444	0	45	1	1	1	1	1	1	No
3939	1	Yes	88.5616	>=60	Male	Secondary	Married	18.7328	0	60	1	1	1	2	1	0.9161	No
1319	1	Yes	63.2384	>=60	Female	Primary or above	Married	23.7253	0	50	1	1	1	4	1	0.73	Yes
3994	1	Yes	63.0466	>=60	Male	Secondary	Married	19.8141	2	80	1	1	1	2	1	0.9161	No
1325	1	Yes	62.8932	>=60	Female	Primary or above	Married	25.8065	0	50	1	1	1	1	1	1	No
3986	1	Yes	49.5342	40-49	Male	Primary or above	Married	24.0055	0	90	1	1	1	1	1	1	Yes-un-diagnosed
3126	1	Yes	69.5644	>=60	Female	Primary or above	Divorced	20.9566	1	90	1	1	1	1	1	1	Yes
1118	1	No	62.5699	>=60	Male	Primary or above	Married	22.6003	0		1	1	1	1	1	1	Yes-un-diagnosed
1285	1	Yes	40.5452	40-49	Female	Primary or above	Married	27.3437	0	90	1	1	1	1	1	1	No
1243	1	Yes	41.5479	40-49	Male	High school or above	Married	26.2917	0	90	1	1	1	1	1	1	No
1306	1	Yes	50.9041	50-59	Female	Secondary	Married	31.2175	0	70	1	1	1	1	1	1	Yes-un-diagnosed
3995	1	Yes	58.6712	50-59	Male	Primary or above	Married	27.8876	0	90	1	1	1	1	1	1	Yes
3928	1	Yes	63.5452	>=60	Male	High school or above	Married	25.3906	0	80	1	1	1	1	1	1	Yes
3160	1	Yes	61.5562	>=60	Male	Secondary	Married	21.4844	0	75	1	1	1	1	1	1	Yes
1142	1	Yes	45.5589	40-49	Female	Primary or above	Married	27.7344	1	85	1	1	1	1	1	1	Yes
1103	1	Yes	55.5671	50-59	Male	Primary or above	Married	22.9421	0	40	1	1	1	1	1	1	No
1148	1	Yes	54.5644	50-59	Female	Primary or above	Married	22.2222	1	100	1	1	1	1	1	1	Yes
1323	1	Yes	61.5589	>=60	Female	Primary or above	Married	22.2656	0	80	1	1	1	2	1	0.9161	Yes
3127	1	Yes	59.7781	50-59	Female	High school or above	Single	25.6312	1	75	2	1	1	4	1	0.6608	Yes
1268	1	Yes	57.5589	50-59	Male	Secondary	Married	19.5918	0	80	1	1	1	1	1	1	No
1321	1	Yes	61.5589	>=60	Female	Primary or above	Divorced	27.6398	0	80	1	1	1	1	1	1	Yes
3137	1	Yes	45.5479	40-49	Female	Primary or above	Divorced	20.8889	0	75	1	1	1	1	1	1	No
3979	1	Yes	40.5288	40-49	Female	High school or above	Divorced	23.5556	0	95	1	1	1	1	1	1	Yes-un-diagnosed
3930	1	Yes	68.5342	>=60	Male	Secondary	Married	21.4844	3	30	2	1	1	1	2	0.867	Yes-un-diagnosed
3933	1	Yes	60.8055	>=60	Male	Secondary	Married	21.4844	0	60	1	1	1	1	1	1	Yes-un-diagnosed
1281	1	Yes	61.8548	>=60	Male	Primary or above	Married	24.0238	8	80	1	1	1	1	1	1	Yes
3174	1	Yes	59.5644	50-59	Male	High school or above	Married	28.3848	0	70	1	1	1	1	1	1	Yes
3167	1	Yes	60.5589	>=60	Male	Primary or above	Married	20.3954	0	95	1	1	1	1	1	1	Yes-un-diagnosed
3965	1	Yes	59.5425	50-59	Female	Primary or above	Divorced	21.0007	0	80	1	1	1	1	1	1	No
1125	1	No	63.5726	>=60	Female	Secondary	Married	19.7777	0	50	1	1	1	1	2	0.9362	Yes
1315	1	Yes	57.5562	50-59	Female	Primary or above	Married	25.2994	0	70	1	1	1	2	1	0.9161	No
3131	1	Yes	63.5616	>=60	Female	Secondary	Divorced	22.8928	0	70	1	1	1	1	1	1	Yes
3978	1	Yes	42.5288	40-49	Female	Secondary	Married	27.3437	0	60	1	1	1	1	2	0.9362	Yes-un-diagnosed
1156	1	Yes	52.5644	50-59	Female	Primary or above	Married	21.0517	0	90	1	1	1	1	1	1	No
1330	1	Yes	60.5589	>=60	Female	Primary or above	Divorced	24.1415	0	90	1	1	1	2	1	0.9161	No
3119	1	Yes	58.5534	50-59	Female	Primary or above	Married	18.7305	0	100	1	1	1	1	1	1	No
1096	1	Yes	43.5589	40-49	Male	Secondary	Married	18.9292	0	90	1	1	1	1	1	1	No
3152	1	Yes	47.5507	40-49	Female	Primary or above	Married	24.2215	0	80	1	1	1	1	1	1	No
1104	1	Yes	54.5671	50-59	Male	Secondary	Married	19.721	0	75	1	1	1	2	1	0.9161	Yes
1120	1	No	62.5699	>=60	Male	High school or above	Married	18.75	0	70	1	1	1	1	1	1	Yes
1275	1	Yes	65.1534	>=60	Male	High school or above	Married	20.9572	1		1	1	1	1	2	0.9362	Yes
1153	1	Yes	51.5644	50-59	Female	Primary or above	Married	27.5556	0	85	1	1	1	1	1	1	No
1490	1	Yes	40.5562	40-49	Female	Secondary	Married	21.7778	0	75	1	1	1	1	1	1	No
3955	1	Yes	54.537	50-59	Female	High school or above	Married	26.986	0	100	1	1	1	1	1	1	No
1098	1	Yes	47.5616	40-49	Male	Primary or above	Married	24.3141	1	75	1	1	1	1	1	1	No
1269	1	Yes	58.5589	50-59	Male	Secondary	Married	20.0796	1	60	1	1	1	1	1	1	Yes
1138	1	Yes	44.5589	40-49	Female	Primary or above	Married	23.6832	1	70	1	1	1	1	1	1	No
3998	1	Yes	49.6164	40-49	Female	Primary or above	Married	24.4646	0	50	1	1	1	1	2	0.9362	No
3163	1	Yes	74.5671	>=60	Male	Secondary	Married	23.939	2	65	3	1	2	2	2	0.7274	Yes
1316	1	Yes	58.5562	50-59	Female	Secondary	Married	26.5625	0	80	1	1	1	1	1	1	Yes
1263	1	Yes	57.5589	50-59	Male	Primary or above	Married	25.1486	0	65	1	1	1	1	1	1	Yes-un-diagnosed
3106	1	Yes	55.5534	50-59	Female	High school or above	Married	19.1001	0	90	1	1	1	1	1	1	Yes
3970	1	Yes	57.9315	50-59	Male	High school or above	Married	19.7232	5	70	1	1	1	2	1	0.9161	No
3966	1	No	56.5397	50-59	Male	Secondary	Married	28.0557	0	90	1	1	1	1	1	1	Yes
3951	1	No	77.5534	>=60	Female	Primary or above	Divorced	23.7812	0	50	1	1	1	2	1	0.9161	Yes
3999	1	Yes	62.4027	>=60	Female	High school or above	Divorced	23.3091	2	60	1	1	1	1	2	0.9362	Yes
3992	1	Yes	48.263	40-49	Male	High school or above	Married	22.4082	0	95	1	1	1	1	1	1	No
1102	1	Yes	57.5671	50-59	Male	Secondary	Divorced	24.623	0	90	1	1	1	1	1	1	Yes-un-diagnosed
3987	1	Yes	49.2877	40-49	Male	Secondary	Married	21.4109	0	80	1	1	1	1	1	1	Yes-un-diagnosed
3170	1	Yes	55.5562	50-59	Male	Secondary	Married	25.2363	0	80	2	1	3	1	1	0.8721	Yes-un-diagnosed
1124	1	No	68.5753	>=60	Female	Primary or above	Divorced	22.9421	1	70	1	1	1	1	1	1	No
1262	1	Yes	57.5589	50-59	Male	Primary or above	Married	18.3655	0	90	1	1	1	1	1	1	No
1309	1	Yes	54.5534	50-59	Female	Primary or above	Divorced	28.3771	0	80	1	1	1	1	1	1	Yes-un-diagnosed
3948	1	Yes	70.5479	>=60	Female	Primary or above	Divorced	24.4444	1	50	1	1	1	2	1	0.9161	Yes
3146	1	Yes	44.5534	40-49	Male	Secondary	Married	22.6667	0	80	2	1	1	1	1	0.9308	No
3975	1	Yes	41.1205	40-49	Female	Primary or above	Married	32.4619	1	65	1	1	1	1	1	1	Yes-un-diagnosed
1151	1	Yes	57.5671	50-59	Female	Primary or above	Married	28.8889	0	50	3	1	1	3	1	0.7694	Yes
1298	1	Yes	45.5479	40-49	Female	Secondary	Married	25.7778	0	80	1	1	1	2	1	0.9161	Yes
3169	1	Yes	51.5534	50-59	Male	Primary or above	Married	19.8347	0	70	1	1	1	1	1	1	Yes
1130	1	Yes	66.5726	>=60	Female	Primary or above	Married	24	0	65	1	1	1	1	1	1	No
1313	1	Yes	51.5534	50-59	Female	Primary or above	Married	24	0	60	1	1	1	2	2	0.8523	Yes
3182	1	Yes	56.5616	50-59	Male	Secondary	Married	21.0077	0	80	1	1	1	1	1	1	No
3945	1	Yes	66.4603	>=60	Female	High school or above	Divorced	22.2222	0	60	1	1	1	1	1	1	No
3154	1	Yes	40.5425	40-49	Male	Primary or above	Married	25.3333	0	90	1	1	1	1	1	1	No
3996	1	Yes	46.3699	40-49	Male	Primary or above	Married	24.2187	0	80	1	1	1	1	1	1	No
3142	1	Yes	47.5507	40-49	Female	High school or above	Married	22.2137	0	90	1	1	1	1	1	1	No
1113	1	No	56.5671	50-59	Male	Secondary	Married	17.2584	0	70	1	1	1	2	1	0.9161	Yes
1303	1	Yes	53.5534	50-59	Female	Primary or above	Married	26.6667	0	50	1	1	1	1	1	1	Yes
1296	1	Yes	46.9205	40-49	Female	Primary or above	Married	21.7778	0	80	1	1	1	1	1	1	Yes-un-diagnosed
3101	1	Yes	47.5507	40-49	Male	Secondary	Married	22.3214	0	100	1	1	1	1	1	1	Yes-un-diagnosed
3961	1	Yes	55.5397	50-59	Female	Primary or above	Single	19.5312	0	100	1	3	2	1	2	0.8438	Yes-un-diagnosed
1282	1	Yes	59.8904	50-59	Male	Primary or above	Single	19.1406	1	65	1	1	1	1	1	1	Yes
1146	1	Yes	56.5671	50-59	Female	Primary or above	Single	26.9127	0	70	1	1	1	1	1	1	No
1149	1	Yes	56.5671	50-59	Female	Primary or above	Married	28.6667	0	80	1	1	1	1	1	1	Yes-un-diagnosed
3989	1	Yes	44.3014	40-49	Male	Primary or above	Married	16.937	2	50	1	1	1	2	2	0.8523	No
1119	1	Yes	63.5726	>=60	Male	High school or above	Married	24.2424	5	80	1	1	1	1	1	1	Yes
1115	1	No	64.5726	>=60	Male	Secondary	Married	25.8645	0	100	1	1	1	1	1	1	Yes
1112	1	Yes	59.5699	50-59	Male	Primary or above	Married	22.6562	0	65	2	1	1	1	1	0.9308	Yes
3935	1	Yes	38.7753	40-49	Male	High school or above	Married	14.8789	0	60	1	1	1	1	1	1	No
1107	1	Yes	53.5644	50-59	Male	Secondary	Married	21.3039	0		1	1	1	1	1	1	Yes-un-diagnosed
3943	1	Yes	65.5452	>=60	Female	High school or above	Married	22.2656	1	80	1	1	1	1	1	1	Yes
1259	1	Yes	54.7534	50-59	Male	Secondary	Married	26.2596	0	70	1	1	1	1	1	1	Yes
1158	1	Yes	49.5616	40-49	Female	Secondary	Single	19.5312	0	60	1	1	1	1	1	1	No
3177	1	Yes	54.5534	50-59	Male	Secondary	Married	21.5139	0	75	1	1	1	1	1	1	No
1133	1	No	76.5808	>=60	Female	High school or above	Divorced	26.6667	0	75	2	1	1	1	1	0.9308	Yes
3122	1	Yes	56.9808	50-59	Female	Secondary	Married	22.4766	0	70	3	1	1	3	1	0.7694	No
1297	1	Yes	48.5507	40-49	Female	Primary or above	Married	24.974	0	80	1	1	1	1	1	1	Yes
1111	1	Yes	55.5671	50-59	Male	Secondary	Married	19.8347	0	20	3	2	2	3	2	0.6164	Yes
3929	1	Yes	61.1945	>=60	Male	Secondary	Married	24.1633	1	65	1	1	1	1	1	1	Yes
1097	1	Yes	49.5616	40-49	Male	High school or above	Married	26.8274	0		1	1	1	1	1	1	Yes-un-diagnosed
3967	1	Yes	53.326	50-59	Male	Secondary	Married	28.2284	2	60	1	1	1	1	1	1	Yes
3179	1	Yes	59.5589	50-59	Male	High school or above	Married	19.6052	0	95	1	1	1	1	1	1	Yes-un-diagnosed
1141	1	Yes	42.5562	40-49	Female	Primary or above	Divorced	27.5556	0	60	1	1	1	1	2	0.9362	Yes-un-diagnosed
1329	1	No	69.5644	>=60	Female	Primary or above	Divorced	22.9874	0	50	1	1	1	2	1	0.9161	Yes
3980	1	Yes	48.5342	40-49	Female	Primary or above	Married	23.6244	0	75	1	1	1	1	1	1	No
3969	1	No	58.5397	50-59	Male	Secondary	Married	20.4491	0	70	1	1	1	1	1	1	Yes
3175	1	Yes	59.5644	50-59	Male	Primary or above	Married	19.5312	0	75	1	1	1	1	1	1	Yes
1289	1	Yes	43.5507	40-49	Female	High school or above	Single	24.1415	0	80	1	1	1	3	1	0.8479	No
3150	1	Yes	44.2548	40-49	Male	Secondary	Married	20.5688	0	50	1	1	1	1	1	1	Yes
1121	1	No	84.5863	>=60	Male	Secondary	Married	22.0604	3	60	2	1	1	2	1	0.8469	Yes
1310	1	Yes	54.5534	50-59	Female	Primary or above	Married	23.2834	0	80	1	1	1	1	1	1	No
1143	1	Yes	54.5644	50-59	Female	Primary or above	Married	23.8751	0	80	1	1	1	1	1	1	Yes-un-diagnosed
1101	1	Yes	56.5671	50-59	Male	Primary or above	Married	19.9219	0	80	1	1	1	1	1	1	No
3141	1	Yes	44.5479	40-49	Female	High school or above	Divorced	24.6711	0	70	1	1	1	1	1	1	No
3125	1	Yes	65.5589	>=60	Female	High school or above	Married	32	1	60	4	4	4	4	4	0.0318	Yes
3140	1	Yes	41.5452	40-49	Female	High school or above	Married	23.7253	0	70	1	1	1	1	1	1	Yes-un-diagnosed
1264	1	Yes	52.5562	50-59	Male	Secondary	Married	19.8347	0	95	1	1	1	2	2	0.8523	Yes
1129	1	Yes	71.5781	>=60	Female	Primary or above	Divorced	22.6562	0	65	1	1	1	4	2	0.6662	Yes
3936	1	No	73.5507	>=60	Male	High school or above	Married	16.8242	0	70	1	1	1	1	1	1	Yes-un-diagnosed
1260	1	Yes	53.0466	50-59	Male	Primary or above	Married	20.5688	2	80	1	1	1	1	1	1	Yes
3181	1	Yes	51.5589	50-59	Male	High school or above	Married	30.4272	0	90	1	1	1	1	1	1	Yes-un-diagnosed
3178	1	Yes	51.5534	50-59	Male	Secondary	Married	23.5078	0	80	1	1	1	1	1	1	Yes-un-diagnosed
1486	1	Yes	41.5562	40-49	Male	Primary or above	Married	27.5482	0	90	1	1	1	1	1	1	Yes
1279	1	No	68.5644	>=60	Male	Secondary	Married	20.8117	0	50	1	1	1	1	1	1	Yes-un-diagnosed
1100	1	Yes	49.5616	40-49	Male	Primary or above	Married	22.6757	0	70	1	1	1	1	1	1	Yes-un-diagnosed
3964	1	Yes	55.5397	50-59	Female	Primary or above	Divorced	30.6122	0	100	1	1	1	1	1	1	No
1110	1	Yes	52.5644	50-59	Male	Secondary	Married	25.3934	0	95	1	1	1	1	1	1	Yes
3988	1	No	47.5342	40-49	Male	High school or above	Married	23.1405	0	85	1	1	1	1	1	1	No
3938	1	Yes	76.5534	>=60	Male	Secondary	Married	20.7612	0	70	2	1	1	2	1	0.8469	Yes
3165	1	No	60.5589	>=60	Male	High school or above	Married	19.6927	0	90	1	1	1	1	1	1	Yes-un-diagnosed
3944	1	Yes	60.9233	>=60	Female	Primary or above	Married	23.6832	0	95	1	1	1	1	1	1	No
1311	1	Yes	56.8329	50-59	Female	Primary or above	Married	21.7778	0	40	2	1	1	2	3	0.7343	No
3985	1	Yes	48.874	40-49	Female	Secondary	Married	19.6283	0	80	1	1	1	1	1	1	No
3959	1	Yes	57.5397	50-59	Female	Secondary	Divorced	21.6441	0	85	1	1	1	1	1	1	No
1155	1	Yes	53.5644	50-59	Female	Secondary	Married	22.4766	0	80	1	1	1	1	1	1	No
1136	1	Yes	41.5562	40-49	Female	Primary or above	Married	32.7449	2	75	1	1	1	2	2	0.8523	Yes
1318	1	Yes	66.5616	>=60	Female	Secondary	Married	21.7784	1	50	1	1	1	1	1	1	No
1256	1	Yes	45.5479	40-49	Male	Primary or above	Married	25.3155	0	80	1	1	1	1	1	1	Yes-un-diagnosed
1109	1	Yes	52.5644	50-59	Male	Primary or above	Married	21.6041	0	70	1	1	1	1	1	1	Yes
3155	1	Yes	42.5452	40-49	Male	High school or above	Married	22.4913	0	80	1	1	1	2	1	0.9161	No
1287	1	Yes	40.5452	40-49	Female	Primary or above	Married	24.3496	0	80	1	1	1	1	1	1	No
1244	1	Yes	45.5507	40-49	Male	Secondary	Married	23.7387	0	80	1	1	1	1	1	1	No
1253	1	Yes	49.5534	40-49	Male	Primary or above	Married	17.5781	0	80	1	1	1	1	1	1	Yes-un-diagnosed
3991	1	Yes	49.5342	40-49	Male	Primary or above	Married	26.5731	0	80	1	1	1	1	1	1	Yes-un-diagnosed
3151	1	Yes	39.6329	40-49	Male	Secondary	Married	24.6097	0	90	1	1	1	1	1	1	Yes-un-diagnosed
3109	1	Yes	59.5644	50-59	Male	Secondary	Married	24.3865	0	75	1	1	1	1	1	1	Yes
3117	1	Yes	53.5534	50-59	Female	Secondary	Divorced	29.1363	1	70	1	1	1	1	1	1	Yes-un-diagnosed
3982	1	Yes	48.5342	40-49	Female	Primary or above	Married	23.5556	1	50	1	1	1	1	1	1	Yes-un-diagnosed
3103	1	Yes	52.5534	50-59	Female	Primary or above	Married	26.6667	0	80	1	1	1	1	1	1	No
1290	1	Yes	49.5534	40-49	Female	Secondary	Married	19.2277	0	90	1	1	1	1	1	1	No
1270	1	Yes	57.537	50-59	Male	Secondary	Married	23.3091	0	95	1	1	1	1	1	1	Yes-un-diagnosed
1091	1	Yes	43.5589	40-49	Male	Secondary	Married	22.9421	0	90	1	1	1	1	1	1	Yes-un-diagnosed
1274	1	Yes	61.5397	>=60	Male	Secondary	Married	19.433	0	85	1	1	1	1	1	1	No
3153	1	Yes	44.5479	40-49	Male	High school or above	Married	23.5883	0	68	1	1	1	2	1	0.9161	Yes-un-diagnosed
1247	1	Yes	49.1479	40-49	Male	Secondary	Married	18.7328	0	85	1	1	1	1	1	1	No
1291	1	Yes	49.5534	40-49	Female	Primary or above	Divorced	26.6667	2	50	1	1	1	1	1	1	Yes
3164	1	Yes	65.1836	>=60	Male	High school or above	Married	25	0	40	2	1	1	2	1	0.8469	Yes
1157	1	No	60.5699	>=60	Male	High school or above	Married	23.8751	0	60	1	1	1	1	1	1	Yes-un-diagnosed
1288	1	Yes	43.2521	40-49	Female	Secondary	Married	23.9188	0	70	1	1	1	1	1	1	Yes
1272	1	Yes	65.5644	>=60	Male	Primary or above	Married	17.9282	0	75	1	1	1	2	1	0.9161	No
1254	1	Yes	47.5534	40-49	Male	Primary or above	Married	17.9282	0	80	1	1	1	1	1	1	No
3173	1	Yes	54.5534	50-59	Male	Primary or above	Married	23.3067	0	75	1	1	1	1	1	1	Yes
1326	1	Yes	62.9671	>=60	Female	Secondary	Married	24.5578	0	70	1	1	1	2	1	0.9161	Yes
1152	1	Yes	55.5671	50-59	Female	Secondary	Divorced	18.902	0	80	1	1	1	1	1	1	No
1117	1	Yes	61.5699	>=60	Male	Secondary	Married	19.3337	0	85	1	1	1	1	1	1	Yes
1135	1	Yes	48.5616	40-49	Female	Primary or above	Divorced	19.1746	0	70	1	1	1	2	2	0.8523	No
3128	1	Yes	60.5562	>=60	Female	Secondary	Married	21.7193	0	95	1	1	1	1	1	1	No
1491	1	Yes	48.5616	40-49	Female	High school or above	Married	24.8358	0	80	1	1	1	1	1	1	Yes
1276	1	Yes	61.8603	>=60	Male	High school or above	Married	25.3906	0	80	2	1	1	2	1	0.8469	Yes
3145	1	Yes	48.5562	40-49	Male	High school or above	Married	24.6094	0	80	1	1	1	2	1	0.9161	Yes-un-diagnosed
1105	1	Yes	50.5616	50-59	Male	High school or above	Married	24.9135	0	100	1	1	1	1	1	1	No
1255	1	Yes	45.5507	40-49	Male	Secondary	Married	26.2188	0	80	1	1	1	2	1	0.9161	No
3990	1	Yes	46.5315	40-49	Male	High school or above	Married	26.2596	0	90	1	1	1	1	1	1	Yes-un-diagnosed
3176	1	Yes	53.5534	50-59	Male	High school or above	Married	22.2063	0	85	1	1	1	1	1	1	No
1301	1	Yes	42.5479	40-49	Female	Secondary	Married	23.833	0	80	1	1	1	1	1	1	Yes-un-diagnosed
1317	1	Yes	66.0027	>=60	Female	High school or above	Divorced	24.0346	0	95	1	1	1	1	1	1	No
1099	1	Yes	44.5589	40-49	Male	High school or above	Married	22.6003	0	70	1	1	1	2	1	0.9161	Yes-un-diagnosed
3972	1	Yes	57.474	50-59	Male	High school or above	Married	18.9036	0	50	1	1	1	2	2	0.8523	No
3942	1	Yes	61.5425	>=60	Female	High school or above	Married	19.5312	0	70	1	1	1	1	1	1	Yes
3157	1	Yes	42.8575	40-49	Male	High school or above	Married	19.8347	0	80	1	1	1	1	1	1	No
1307	1	Yes	56.5151	50-59	Female	Primary or above	Married	23.1111	0	100	1	1	1	1	1	1	Yes-un-diagnosed
3144	1	Yes	47.5507	40-49	Male	Primary or above	Married	26.8136	0	50	1	1	1	2	1	0.9161	Yes
3171	1	Yes	50.5507	50-59	Male	Secondary	Married	22.0386	0	80	1	1	1	1	1	1	Yes-un-diagnosed
3932	1	Yes	64.4137	>=60	Male	High school or above	Married	27.6817	2	60	2	1	1	2	2	0.7831	Yes
1295	1	Yes	41.7452	40-49	Female	Primary or above		18.0662	0	70	2	1	1	2	1	0.8469	No
1137	1	Yes	46.5589	40-49	Female	Secondary	Married	27.6398	0	50	1	1	1	1	1	1	No
3158	1	No	60.5589	>=60	Male	Secondary	Married	25.0995	2	60	1	1	1	1	1	1	Yes
3973	1	Yes	59.4959	50-59	Male	High school or above	Married	27.1416	5	90	1	1	1	2	1	0.9161	No
1266	1	Yes	54.5562	50-59	Male	High school or above	Married	20.9573	0	75	2	1	1	1	1	0.9308	No
3952	1	Yes	70.5479	>=60	Female	High school or above	Divorced	22.2656	1	80	1	1	1	1	1	1	No
1299	1	Yes	46.5479	40-49	Female	Primary or above	Married	24.8889	0	80	1	1	1	1	2	0.9362	Yes
1127	1	Yes	64.5726	>=60	Female	Primary or above	Divorced	21.7778	0	70	1	1	1	2	1	0.9161	No
3925	1	No	60.6795	>=60	Male	Secondary	Married	20.2848	0	80	1	1	1	1	2	0.9362	Yes
3118	1	Yes	54.5534	50-59	Female	High school or above	Married	22.2137	0	80	1	1	1	1	1	1	No
3946	1	Yes	60.0877	>=60	Female	High school or above	Divorced	25.2081	2	50	1	1	1	1	2	0.9362	Yes
3956	1	Yes	56.5397	50-59	Female	Primary or above	Married	20.9321	0	90	1	1	1	2	1	0.9161	No
3133	1	Yes	65.5589	>=60	Female	High school or above	Married	20.2395	0	70	3	1	1	3	2	0.7056	Yes
1261	1	Yes	56.4548	50-59	Male	Primary or above	Single	17.6898	0	60	1	1	1	1	1	1	Yes
1245	1	Yes	42.5479	40-49	Male	High school or above	Divorced	29.3848	0	70	1	1	1	2	2	0.8523	Yes-un-diagnosed
3168	1	Yes	49.6795	40-49	Male	Secondary	Married	20.0692	0	80	1	1	1	1	3	0.8874	Yes
1327	1	Yes	61.5589	>=60	Female	Primary or above	Married	28.2284	1	70	1	1	1	2	1	0.9161	Yes
3124	1	Yes	61.5589	>=60	Female	Secondary	Married	23.3091	0	50	1	1	1	1	1	1	Yes
1489	1	Yes	46.5589	40-49	Female	Secondary	Married	18.1312	1	70	1	1	1	2	1	0.9161	No
3968	1	Yes	50.5342	50-59	Male	Primary or above	Married	18.75	0	60	2	1	2	2	2	0.7367	Yes-un-diagnosed
3110	1	Yes	44.5534	40-49	Male	Primary or above	Married	20.9573	0	70	1	1	1	1	1	1	Yes
3139	1	Yes	45.5479	40-49	Female	High school or above	Married	27.8876	0	90	1	1	1	2	1	0.9161	No
3147	1	Yes	40.5452	40-49	Male	Primary or above	Married	28.0102	0	80	1	1	1	1	1	1	No
1280	1	Yes	75.5699	>=60	Male	Secondary	Married	24.977	4	100	1	1	1	1	1	1	Yes
3104	1	Yes	41.5452	40-49	Male	Primary or above	Married	31.1111	0	80	1	1	1	1	1	1	Yes-un-diagnosed
3172	1	No	59.1178	50-59	Male	High school or above	Divorced	23.5294	0	80	1	1	1	1	1	1	No
3159	1	No	78.7699	>=60	Male	High school or above	Married	25.7117	0	100	1	1	1	1	1	1	Yes
3997	1	Yes	44.5315	40-49	Male	Primary or above	Single	17.4818	0	80	1	1	1	1	1	1	No
3105	1	Yes	64.5616	>=60	Female	Primary or above	Married	20.8117	1	75	1	1	1	2	1	0.9161	Yes
1145	1	Yes	58.5671	50-59	Female	Primary or above	Married	24.4444	0	100	1	1	1	1	1	1	No
3963	1	Yes	51.2055	50-59	Female	High school or above	Single	19.1111	1	70	1	1	1	2	1	0.9161	No
1322	1	Yes	65.263	>=60	Female	High school or above	Married	23.5556	0	80	1	1	1	1	2	0.9362	No
3115	1	Yes	56.5616	50-59	Female	Primary or above	Married	24.2187	0	80	1	1	1	1	1	1	Yes
3107	1	Yes	60.5562	>=60	Female	Primary or above	Married	13.1492	0	60	2	1	1	2	1	0.8469	No
1134	1	Yes	42.5562	40-49	Female	High school or above	Married	24.1415	1	60	1	1	1	1	1	1	Yes
3148	1	Yes	42.7699	40-49	Male	Secondary	Married	24.7475	0	90	1	1	1	1	1	1	Yes-un-diagnosed
1293	1	Yes	42.7014	40-49	Female	High school or above	Married	26.6667	0	80	1	1	1	1	1	1	No
3134	2	Yes	46.5479	40-49	Female	Primary or above	Married	20.9184	0	70	1	1	1	1	1	1	Yes
3993	1	Yes	49.5342	40-49	Male	Primary or above	Married	19.052	0	80	1	1	1	2	1	0.9161	No
3112	1	Yes	49.5507	40-49	Male	Secondary	Married	21.7993	0	70	1	1	1	1	1	1	No
3149	1	Yes	46.2329	40-49	Male	Primary or above	Married	20.0692	0	70	1	1	1	1	1	1	No
3116	1	Yes	57.5562	50-59	Female	Secondary	Married	23.5304	0	100	1	1	1	1	1	1	No
1273	1	No	74.5699	>=60	Male	Secondary	Married	19.0311	0	100	1	1	1	1	1	1	Yes-un-diagnosed
3934	1	Yes	63.5452	>=60	Male	High school or above	Married	23.4375	0	100	1	1	1	1	1	1	No
1284	1	Yes	39.5699	40-49	Female	High school or above	Divorced	22.0604	0	50	1	1	1	1	1	1	No
1131	1	Yes	61.5699	>=60	Female	Primary or above	Married	26.6667	1	80	1	1	1	1	1	1	Yes
3111	1	Yes	57.5562	50-59	Female	High school or above	Divorced	23.9224	0	80	1	1	1	1	1	1	No
1314	1	Yes	58.9918	50-59	Female	Primary or above	Married	22.2137	0	80	1	1	1	1	1	1	No
1246	1	Yes	41.5452	40-49	Male	High school or above	Married	20.2812	0		1	1	1	1	1	1	No
1089	1	Yes	43.5589	40-49	Male	Primary or above	Married	20.0692	0	90	1	1	1	1	1	1	No
1106	1	Yes	50.5616	50-59	Male	Primary or above	Single	24.4646	0	60	1	1	1	1	1	1	No
1487	1	Yes	45.5589	40-49	Male	Primary or above	Married	19.2277	0	70	1	1	1	1	1	1	Yes-un-diagnosed
3143	1	Yes	40.5452	40-49	Female	Primary or above	Divorced	20.8889	1	90	1	1	1	1	1	1	No
3977	1	Yes	41.5288	40-49	Female	Secondary	Married	20.5442	0	80	1	1	1	1	1	1	No
3121	1	Yes	50.5507	50-59	Female	Primary or above	Married	24.7325	0	70	2	1	2	3	2	0.6685	No
1308	1	Yes	54.5534	50-59	Female	Primary or above	Divorced	31.2175	1	50	1	2	2	1	2	0.847	Yes
3135	1	Yes	39.6411	40-49	Female	Secondary	Married	20.8117	0	80	1	1	1	1	1	1	No
3180	1	Yes	51.5589	50-59	Male	High school or above	Married	18.5178	0	100	1	1	1	1	1	1	No
1320	1	Yes	68.5644	>=60	Female	Primary or above	Divorced	30.4272	0	85	1	1	1	2	1	0.9161	No
1294	1	Yes	40.8247	40-49	Female	High school or above	Married	28.3039	0	80	1	1	1	1	1	1	Yes-un-diagnosed
1249	1	Yes	40.5479	40-49	Male	Primary or above	Married	25.2092	0	85	1	1	1	1	1	1	Yes-un-diagnosed
3976	1	Yes	40.5288	40-49	Female	Primary or above	Married	23.3726	0	70	1	1	1	1	2	0.9362	Yes-un-diagnosed
3971	1	Yes	57.2301	50-59	Male	Secondary	Married	22.5827	0	70	1	1	1	1	2	0.9362	No
3162	1	Yes	75.5699	>=60	Male	Secondary	Married	24.8016	1	50	2	1	1	1	1	0.9308	Yes
3138	1	Yes	44.5479	40-49	Female	Secondary	Married	13.8408	1	70	1	1	1	2	2	0.8523	No
1147	1	Yes	55.5671	50-59	Female	Primary or above	Married	20.9321	0	70	1	1	1	2	1	0.9161	No
3958	1	Yes	58.5397	50-59	Female	Primary or above	Married	26.6667	1	90	1	1	1	2	1	0.9161	Yes
1094	1	Yes	49.5616	40-49	Male	Primary or above	Married	22.4913	0	80	1	1	1	1	1	1	No
1108	1	Yes	50.5616	50-59	Male	High school or above	Married	20.7612	0	75	1	1	1	3	1	0.8479	Yes
1292	1	Yes	39.5589	40-49	Female	Primary or above	Married	28.0404	0	65	1	1	1	2	1	0.9161	No
1248	1	Yes	41.5479	40-49	Male	Primary or above	Married	19.487	0		1	1	1	1	1	1	Yes-un-diagnosed
1132	1	Yes	62.5699	>=60	Female	Primary or above	Divorced	28.8889	0	80	1	1	1	1	1	1	Yes
3957	1	Yes	56.7425	50-59	Female	Secondary	Married	21.3333	0	80	1	1	1	1	1	1	No
1265	2	Yes	54.5562	50-59	Male	Secondary	Married	24.7475	1	80	1	1	1	2	1	0.9161	Yes
1144	1	Yes	54.5644	50-59	Female	Secondary	Married	25.3902	0	75	1	1	1	1	1	1	Yes-un-diagnosed
3984	1	Yes	41.3616	40-49	Female	Primary or above	Divorced	26.6389	0	100	1	1	1	1	1	1	No
1114	1	Yes	67.5753	>=60	Male	High school or above	Married	23.5863	1	85	1	1	1	1	1	1	No
1271	1	Yes	60.5616	>=60	Male	Primary or above	Married	17.301	0	50	1	1	1	1	1	1	Yes-un-diagnosed
1126	1	No	70.5753	>=60	Female	Primary or above	Married	24	0	90	1	1	1	1	1	1	Yes
3983	1	Yes	48.5342	40-49	Female	Secondary	Divorced	25.5588	0	80	1	1	1	1	1	1	Yes
1312	1	Yes	55.5562	50-59	Female	High school or above	Married	22.6409	0	80	1	1	1	2	1	0.9161	No
3974	1	Yes	54.0411	50-59	Male	Secondary	Married	26.0933	0	80	1	1	1	1	1	1	No
1304	1	Yes	54.5534	50-59	Female	Secondary	Married	24.8358	0	80	2	1	1	1	1	0.9308	Yes-un-diagnosed
1128	1	No	66.5726	>=60	Female	Secondary	Divorced	20.3428	0	60	1	1	1	1	1	1	No
3949	1	Yes	72.5507	>=60	Female	High school or above	Married	18.424	0	90	1	1	1	1	1	1	No
1123	1	No	66.5753	>=60	Female	Primary or above	Divorced	22.2222	0	80	1	1	1	1	1	1	Yes
1093	1	Yes	49.5616	40-49	Male	Primary or above	Married	21.4844	0	80	1	1	1	1	1	1	Yes-un-diagnosed
1252	1	Yes	44.5507	40-49	Male	High school or above	Married	23.0112	0	100	1	1	1	1	1	1	No
3161	1	Yes	67.5644	>=60	Male	Secondary	Married	21.3599	3	85	2	1	1	1	1	0.9308	Yes
1154	1	Yes	59.5699	50-59	Female	Primary or above	Married	26.6667	0	90	1	1	1	1	1	1	Yes
1286	1	Yes	48.5507	40-49	Female	Primary or above	Divorced	21.3333	0	60	4	1	1	3	3	0.5289	No
1250	1	Yes	43.5507	40-49	Male	Primary or above	Married	19.313	0	90	1	1	1	1	1	1	Yes-un-diagnosed
3981	1	Yes	47.5342	40-49	Female	Secondary	Married	21.3675	0	80	1	1	1	1	1	1	No
1258	1	Yes	58.5589	50-59	Male	Secondary	Married	19.2336	0	60	1	1	1	1	1	1	No
1257	1	Yes	52.4548	50-59	Male	High school or above	Married	24.0238	0	70	1	1	1	1	1	1	No
1300	1	Yes	41.5452	40-49	Female	Primary or above	Single	20.4444	0	100	1	1	1	1	1	1	No
3960	1	Yes	51.1781	50-59	Female	Secondary	Married	25.3333	0	100	1	1	1	1	1	1	No
3931	1	Yes	69.4	>=60	Male	High school or above	Married	21.4533	0	90	1	1	1	1	1	1	Yes-un-diagnosed
1092	1	Yes	45.5589	40-49	Male	Secondary	Married	22.6667	0	70	1	1	1	1	1	1	No
3954	1	Yes	56.5397	50-59	Female	Primary or above	Married	23.1111	0	80	1	1	1	1	1	1	Yes-un-diagnosed
3962	1	Yes	56.3781	50-59	Female	High school or above	Married	24.3496	0	70	1	1	1	1	2	0.9362	Yes
3102	1	Yes	47.5507	40-49	Female	Primary or above	Single	23.1111	0	70	3	1	1	2	2	0.7738	No
1267	1	Yes	55.3589	50-59	Male	Secondary	Married	32.9879	0	100	1	1	1	1	1	1	Yes
1302	1	Yes	57.1123	50-59	Female	Primary or above	Divorced	21.4031	0	80	1	1	1	1	1	1	Yes
3108	1	Yes	47.5507	40-49	Female	Primary or above	Married	27.993	0	70	1	1	1	2	1	0.9161	No
1251	1	Yes	41.5479	40-49	Male	Primary or above	Single	22.6562	0	90	1	1	1	1	1	1	Yes-un-diagnosed
1331	1	Yes	59.5589	50-59	Female	Primary or above	Divorced	22.4766	1	50	1	1	1	2	1	0.9161	No
3927	1	Yes	69.5479	>=60	Male	High school or above	Married	18.026	0	60	1	1	1	2	1	0.9161	No
3947	1	Yes	62.1288	>=60	Female	Secondary	Married	26.2222	1	80	1	1	1	2	1	0.9161	No
3136	2	Yes	43.5479	40-49	Female	Primary or above	Married	18.6667	0	85	1	1	1	1	1	1	Yes
3953	1	Yes	51.537	50-59	Female	Secondary	Divorced	21.5019	0	90	1	1	1	2	2	0.8523	No
3129	1	Yes	60.5589	>=60	Female	Primary or above	Married	19.1467	0	80	1	1	1	1	1	1	No
1328	1	Yes	67.5644	>=60	Female	Secondary	Divorced	17.7458	0	80	1	1	1	2	1	0.9161	Yes-un-diagnosed
3120	1	Yes	57.5562	50-59	Female	Secondary	Married	17.6254	0	80	1	1	1	1	1	1	No
3156	1	Yes	41.5452	40-49	Male	Primary or above	Married	17.301	0	70	1	1	1	1	1	1	No
3937	1	Yes	71.1151	>=60	Male	Secondary	Married	21.2585	0	80	1	1	1	1	1	1	Yes
3130	1	Yes	59.8	50-59	Female	High school or above	Married	22.1893	1	80	2	1	1	2	1	0.8469	No
1140	1	Yes	44.5589	40-49	Female	Primary or above	Married	22.6409	0	80	1	1	1	1	1	1	No
1095	1	Yes	43.5589	40-49	Male	Primary or above	Married	19.8347	0	70	1	1	1	1	1	1	No
3114	1	Yes	57.5616	50-59	Male	Primary or above	Married	25.3333	0	60	1	1	1	1	1	1	Yes
1150	1	Yes	57.5671	50-59	Female	Primary or above	Married	21.3333	0	90	1	1	1	1	1	1	Yes-un-diagnosed
3132	1	Yes	60.5589	>=60	Female	Primary or above	Single	24.4352	0	70	1	1	1	1	1	1	Yes
3113	1	Yes	53.5507	50-59	Female	Primary or above	Married	24.3496	0	80	2	1	1	1	1	0.9308	No
1122	1	Yes	73.5781	>=60	Female	Primary or above	Married	22.2222	0	50	3	2	2	3	2	0.6164	Yes
3080	1	Yes	48.5589	40-49	Male	Secondary	Divorced	26.1719	0	80	1	1	1	1	1	1	No
3166	1	Yes	61.1288	>=60	Male	High school or above	Married	23.9869	0	100	1	1	1	1	1	1	Yes-un-diagnosed
3123	1	Yes	59.5589	50-59	Female	Secondary	Married	23.7118	0	75	1	1	1	2	1	0.9161	Yes-un-diagnosed
1488	1	Yes	40.5562	40-49	Female	High school or above	Married	20.3428	0	80	1	1	1	1	1	1	No
1305	1	Yes	55.0274	50-59	Female	Primary or above	Divorced	26.6667	0	80	1	1	1	1	1	1	Yes
3941	1	Yes	60.0055	>=60	Female	Secondary	Divorced	20.8117	0	70	2	1	1	2	1	0.8469	No
1278	1	Yes	72.5671	>=60	Male	Secondary	Married	23.3067	2	50	1	1	1	2	1	0.9161	No
1090	1	Yes	49.5616	40-49	Male	Primary or above	Married	25.7276	0	90	1	1	1	1	1	1	No
1088	1	Yes	45.5589	40-49	Male	High school or above	Married	23.03	0	80	1	1	1	1	1	1	Yes
1324	1	Yes	63.7753	>=60	Female	High school or above	Married	25.3333	0	80	1	1	1	1	1	1	Yes
3950	1	No	75.5534	>=60	Female	Primary or above	Divorced	22.3478	1	80	2	1	1	2	1	0.8469	Yes
1025	1	Yes	54.5342	50-59	Female	High school or above	Divorced	28.9062	1	80	1	1	1	1	1	1	Yes
1411	1	Yes	44.5699	40-49	Female	Secondary	Married	20.4444	0	70	1	1	1	1	1	1	Yes-un-diagnosed
1007	1	Yes	66.2192	>=60	Female	Primary or above	Married	17.7999	1	95	1	1	1	1	1	1	No
3280	1	Yes	83.6	>=60	Male	High school or above	Married	20.9572	1	75	1	1	1	1	1	1	No
2215	1	Yes	41.5397	40-49	Male	Primary or above	Divorced	19.9481	0	75	1	1	1	1	1	1	No
2167	1	Yes	57.5507	50-59	Female	Secondary	Married	26.1593	0	50	2	1	1	2	1	0.8469	Yes
2180	1	Yes	49.5452	40-49	Female	Primary or above	Married	24.0346	0	90	1	1	1	1	1	1	No
1461	1	Yes	56.5781	50-59	Male	Primary or above	Married	22.5827	0	70	1	1	1	1	1	1	Yes-un-diagnosed
3251	1	Yes	44.5726	40-49	Male	Secondary	Married	23.3355	0	70	1	1	1	1	1	1	No
1423	1	Yes	43.5699	40-49	Female	Secondary	Married	21.6311	0	80	1	1	1	1	1	1	Yes
1437	1	Yes	53.5753	50-59	Female	Secondary	Divorced	22.2222	0	80	1	1	1	1	1	1	No
1004	1	Yes	69.1123	>=60	Female	Secondary	Single	27.5862	0	80	2	1	1	1	1	0.9308	No
1442	1	No	63.5836	>=60	Female	Primary or above	Single	24.974	0	80	2	1	1	1	1	0.9308	No
1028	1	Yes	51.7863	50-59	Female	Secondary	Married	24.4444	0	60	2	1	1	1	1	0.9308	No
1064	1	Yes	50.5315	50-59	Female	High school or above	Divorced	18.718	1	90	1	1	1	1	1	1	No
1063	1	Yes	41.5342	40-49	Female	High school or above	Married	20.6612	0	85	1	1	1	1	1	1	No
1083	1	Yes	67.5562	>=60	Male	Primary or above	Married	19.4771	0	80	1	1	1	1	1	1	Yes
1068	1	Yes	48.7288	40-49	Female	High school or above	Married	23.03	0	70	2	1	1	1	1	0.9308	Yes-un-diagnosed
1045	1	Yes	43.537	40-49	Male	Secondary	Married	22.0581	0	70	1	1	1	1	1	1	Yes-un-diagnosed
3230	1	Yes	62.5836	>=60	Female	Primary or above	Married	21.6441	1	60	1	1	1	4	1	0.73	Yes
1459	1	No	49.1671	40-49	Male	Primary or above	Married	21.3382	1	100	5	5	1	1	2	0.329	Yes
1471	1	Yes	51.5753	50-59	Male	Secondary	Married	23.0518	0	60	1	1	1	1	1	1	No
1082	1	Yes	70.5562	>=60	Male	High school or above	Married	19.1467	0	75	1	1	1	1	1	1	No
1042	1	Yes	45.5397	40-49	Male	Secondary	Married	23.8087	0	70	1	1	1	2	1	0.9161	No
2226	1	Yes	58.5507	50-59	Male	High school or above		24.4646	0	100	1	1	1	1	1	1	No
2194	1	Yes	65.5534	>=60	Female	Secondary	Married	21.3333	0	90	1	1	1	1	1	1	Yes
2171	1	Yes	59.5534	50-59	Female	High school or above	Married	23.3377	0	80	1	1	1	1	1	1	Yes
2224	1	No	52.5479	50-59	Male	High school or above	Married	19.4804	0	90	1	1	1	1	1	1	Yes
2322	1	Yes	58.5808	50-59	Male	High school or above	Married	20.7612	0	75	1	1	1	1	2	0.9362	No
3224	1	Yes	52.5781	50-59	Female	Secondary	Married	20.061	0	60	1	1	1	2	1	0.9161	No
3225	1	No	69.589	>=60	Female	Secondary	Married	26.6667	1	50	1	1	1	2	1	0.9161	Yes
2197	1	Yes	65.5534	>=60	Female	Primary or above	Single	19.5556	0	100	1	1	1	1	1	1	Yes
1436	1	Yes	56.5781	50-59	Female	High school or above	Married	19.9792	1	70	1	1	1	1	1	1	Yes
2183	1	Yes	41.5397	40-49	Female	High school or above	Married	18.8271	0	80	1	1	1	1	1	1	No
3248	1	Yes	49.5753	40-49	Male	Secondary	Married	26.7299	0	65	1	1	1	1	2	0.9362	Yes-un-diagnosed
3226	1	Yes	62.5836	>=60	Female	Secondary	Divorced	27.0552	0	100	1	1	1	1	1	1	No
1454	1	Yes	41.5671	40-49	Male	Primary or above	Married	24.3375	0	70	1	1	1	1	1	1	Yes
1457	1	Yes	43.8356	40-49	Male	High school or above	Married	23.3355	0	70	1	1	1	1	1	1	Yes-un-diagnosed
1485	1	No	70.5863	>=60	Male	High school or above	Divorced	17.9282	0	80	1	1	1	1	1	1	Yes
1086	2	Yes	77.863	>=60	Male	High school or above	Married	25.3444	0	90	1	1	1	1	1	1	No
1031	1	Yes	55.9945	50-59	Female	High school or above	Married	20.4444	0	85	1	1	1	2	1	0.9161	No
3209	1	Yes	41.5699	40-49	Female	Primary or above	Married	26.4792	0	70	1	1	1	2	3	0.8035	No
2187	1	Yes	43.5425	40-49	Female	High school or above	Married	19.5312	0	80	1	1	1	1	1	1	No
2213	1	Yes	47.5452	40-49	Male	Primary or above		21.3039	0	90	1	1	1	1	1	1	No
1001	1	Yes	62.5397	>=60	Female	High school or above	Married	21.3593	0	75	1	1	1	1	1	1	No
3205	1	Yes	48.5726	40-49	Female	High school or above	Married	22.3703	0	75	1	1	1	1	1	1	No
1420	1	Yes	42.5671	40-49	Female	Primary or above	Married	16.2331	0	70	3	1	1	3	1	0.7694	No
3238	1	Yes	64.5863	>=60	Female	Primary or above	Married	26	1	70	1	1	1	1	1	1	Yes
2209	1	Yes	70.5562	>=60	Male	High school or above	Married	15.7768	0	50	1	1	1	2	2	0.8523	Yes
1062	1	Yes	46.5288	40-49	Female	High school or above	Divorced	22.1836	0	70	1	1	1	1	1	1	No
2229	1	Yes	57.5479	50-59	Male	High school or above	Married	22.3214	0	60	1	1	1	1	1	1	Yes-un-diagnosed
3245	1	Yes	44.5726	40-49	Male	High school or above	Married	20.9572	0	65	2	1	1	2	1	0.8469	Yes-un-diagnosed
1419	1	Yes	47.5726	40-49	Female	High school or above	Married	24.7676	0	100	1	1	1	1	1	1	No
3211	1	Yes	47.5753	40-49	Female	High school or above		21.3675	0	70	1	1	1	1	1	1	No
2179	1	Yes	46.5425	40-49	Female	Secondary	Married	21.6713	0	60	2	1	1	1	1	0.9308	Yes
1460	1	Yes	59.5808	50-59	Male	Secondary	Single	20.7612	0	70	1	1	1	2	2	0.8523	No
3240	1	Yes	48.5753	40-49	Male	Primary or above	Married	20.7157	0	80	1	1	1	1	1	1	Yes-un-diagnosed
1465	1	Yes	55.5781	50-59	Male	Primary or above	Married	21.9713	0	70	1	1	1	1	1	1	Yes
2225	1	Yes	59.5534	50-59	Male	Primary or above	Married	23.2434	1	75	1	1	1	1	1	1	No
3234	1	Yes	60.5836	>=60	Female	Primary or above	Married	25.2081	0	80	1	1	1	1	1	1	No
3274	1	Yes	65.5863	>=60	Male	Secondary	Married	24.7934	1	60	1	1	1	2	1	0.9161	Yes
3267	1	Yes	55.5808	50-59	Male	Primary or above	Married	21.4536	1	70	1	1	1	1	1	1	Yes
2170	1	Yes	55.5507	50-59	Female	High school or above	Married	20.8889	0	80	1	1	1	1	1	1	No
1012	1	Yes	69.5753	>=60	Female	High school or above	Divorced	18.2222	1	80	1	1	1	1	2	0.9362	Yes
1010	1	Yes	67.6685	>=60	Female	High school or above	Married	21.4844	1	30	2	2	1	3	1	0.7359	Yes
3207	1	Yes	41.5671	40-49	Female	High school or above	Married	20.7031	0	70	1	1	1	1	1	1	No
1439	1	No	68.5863	>=60	Female	Primary or above	Married	23.1111	1	70	1	1	1	1	1	1	Yes
1421	1	Yes	48.5726	40-49	Female	Secondary	Married	23.5556	0	80	1	1	1	1	1	1	No
1433	1	Yes	50.5726	50-59	Female	Secondary	Married	27.4483	0	50	3	1	1	3	2	0.7056	No
1022	1	Yes	56.5452	50-59	Female	Primary or above	Married	15.2344	0	60	1	1	1	1	1	1	No
1448	1	Yes	49.5726	40-49	Male	Primary or above	Married	27.8876	0		1	1	1	1	1	1	Yes
2199	1	Yes	74.5589	>=60	Female	High school or above	Married	26.8386	2	60	2	1	1	1	1	0.9308	Yes-un-diagnosed
2319	1	Yes	56.5808	50-59	Male	Primary or above	Married	24.0055	0	85	1	1	1	1	1	1	No
1015	1	Yes	68.5452	>=60	Female	Primary or above	Divorced	17.002	0	75	1	1	1	1	1	1	No
1036	1	Yes	49.5425	40-49	Male	High school or above	Married	25.6055	0	80	1	1	1	1	1	1	No
1473	1	Yes	58.5781	50-59	Male	High school or above	Married	20.3125	0	70	1	1	1	2	2	0.8523	Yes-un-diagnosed
1413	1	Yes	40.0795	40-49	Female	High school or above	Married	22.4323	0	90	1	1	1	1	1	1	No
1434	1	Yes	56.5781	50-59	Female	Primary or above	Married	20.8117	0	90	1	1	1	1	1	1	No
3259	1	Yes	50.5753	50-59	Male	Secondary	Married	18.4911	0	85	1	1	1	1	1	1	No
2223	1	Yes	53.5452	50-59	Male	Primary or above	Married	16.7657	0	80	1	1	1	1	1	1	No
1483	1	Yes	64.5836	>=60	Male	Secondary	Married	25	0	80	1	1	1	1	1	1	Yes
1076	1	Yes	66.2767	>=60	Male	High school or above	Married	33.564	2	60	1	1	1	1	1	1	Yes
3208	1	Yes	49.5753	40-49	Female	Secondary	Married	22.2222	1	70	1	1	1	2	2	0.8523	No
2185	1	Yes	40.5397	40-49	Female	Secondary	Married	18.6667	0	60	1	1	1	1	1	1	No
1443	1	Yes	70.5863	>=60	Female	High school or above	Divorced	20.7198	0	70	1	1	1	1	1	1	No
1030	1	Yes	58.7507	50-59	Female	Primary or above	Divorced	25.721	0	70	4	2	4	4	1	0.3073	Yes-un-diagnosed
1431	1	Yes	59.5808	50-59	Female	High school or above	Divorced	20.9644	0	90	1	1	1	1	1	1	No
2321	1	Yes	55.5808	50-59	Male	Secondary	Single	19.5312	0	0	1	1	1	1	1	1	Yes
1040	1	Yes	44.5397	40-49	Male	High school or above	Married	23.255	0	80	1	1	1	1	1	1	No
1426	1	Yes	52.5753	50-59	Female	Secondary	Married	22.0604	0	70	1	1	1	1	1	1	Yes-un-diagnosed
2205	1	Yes	64.5534	>=60	Male	Secondary	Married	21.4844	0	60	1	1	1	2	1	0.9161	Yes
1043	1	Yes	47.1233	40-49	Male	High school or above	Married	26.6728	0	50	1	1	1	1	1	1	Yes
1452	1	Yes	44.5699	40-49	Male	Secondary	Married	20.7008	0	90	1	1	1	1	1	1	No
1006	1	Yes	63.5178	>=60	Female	High school or above	Divorced	22.2222	0	70	1	1	1	1	1	1	Yes
3216	1	Yes	56.5808	50-59	Female	High school or above	Married	25.462	0	95	1	1	1	1	1	1	Yes-un-diagnosed
1075	1	Yes	42.9233	40-49	Female	Primary or above	Married	18.3256	0	90	1	1	1	1	1	1	No
1464	1	Yes	57.8822	50-59	Male	High school or above	Married	23.3355	0	80	1	1	1	1	1	1	Yes
1085	1	Yes	72.5562	>=60	Male	High school or above	Married	19.9792	1	100	1	1	1	1	1	1	Yes
1428	1	No	51.5753	50-59	Female	Secondary	Married	22.0604	0	50	1	1	1	1	1	1	Yes
2204	1	Yes	70.5562	>=60	Male	High school or above	Married	19.8141	0	80	2	1	1	1	1	0.9308	No
1429	1	Yes	59.4959	50-59	Female	High school or above	Divorced	22.5183	2	50	1	1	1	2	2	0.8523	Yes
3232	1	Yes	67.5863	>=60	Female	High school or above	Divorced	22.2222	1	50	1	1	1	1	1	1	Yes
3239	1	Yes	74.5918	>=60	Female	Secondary	Married	16.197	0	80	1	1	1	1	1	1	No
2320	1	Yes	57.5808	50-59	Male	Primary or above	Married	22.5896	0	85	1	1	1	1	1	1	Yes-un-diagnosed
1058	1	Yes	55.5205	50-59	Male	Secondary	Married	22.2656	0	70	1	1	1	1	1	1	Yes-un-diagnosed
1467	1	Yes	53.5753	50-59	Male	High school or above	Single	21.6311	0	70	1	1	1	1	2	0.9362	No
1016	1	Yes	70.5452	>=60	Male	Secondary	Married	21.9261	0	80	2	2	1	2	1	0.8041	Yes-un-diagnosed
2178	1	Yes	40.5397	40-49	Female	High school or above	Married	20.4294	0	70	1	1	1	1	1	1	No
3242	1	Yes	44.5726	40-49	Male	Primary or above	Married	21.5019	0	80	1	1	1	1	2	0.9362	Yes
3203	1	Yes	46.5726	40-49	Female	Secondary	Married	22.9398	0	80	1	1	1	1	1	1	No
2208	1	Yes	70.5562	>=60	Male	High school or above	Married	22.6562	0	95	1	1	1	1	1	1	Yes-un-diagnosed
1446	1	Yes	40.5671	40-49	Male	High school or above	Married	20.0692	0	90	1	1	1	1	1	1	Yes-un-diagnosed
3266	1	Yes	54.5781	50-59	Male	Primary or above	Married	24.3046	0	70	1	1	1	1	1	1	Yes-un-diagnosed
1023	1	Yes	50.5315	50-59	Female	High school or above	Married	21.4573	0	90	1	1	1	1	2	0.9362	No
1474	1	Yes	61.5808	>=60	Male	High school or above	Married	23.4375	0	80	1	1	1	1	1	1	Yes-un-diagnosed
3261	1	No	59.5836	50-59	Male	Primary or above	Married	21.6713	0	80	1	1	1	1	1	1	Yes-un-diagnosed
1080	1	Yes	69.5534	>=60	Male	Primary or above	Married	24.7676	0	30	2	1	2	1	1	0.8844	Yes-un-diagnosed
2314	1	Yes	49.5753	40-49	Male	High school or above	Married	26.0584	0	70	1	1	1	1	1	1	Yes
1480	1	Yes	62.5808	>=60	Male	Secondary	Married	22.3214	0	80	1	1	1	1	1	1	No
1052	1	Yes	53.3178	50-59	Male	Primary or above	Married	20.9366	1	75	1	1	1	1	2	0.9362	No
3263	1	Yes	59.5836	50-59	Male	High school or above	Married	24.2187	0	70	1	1	1	1	1	1	Yes
2317	1	Yes	57.5808	50-59	Male	Secondary	Married	22.6562	0	90	1	1	1	1	1	1	No
1432	1	Yes	52.5753	50-59	Female	High school or above	Married	24.0346	0	70	1	1	1	2	1	0.9161	No
1065	1	Yes	51.5425	50-59	Female	Primary or above	Divorced	20.6131	0	60	1	1	1	1	1	1	No
3258	1	Yes	56.5781	50-59	Male	High school or above	Married	21.4844	0	90	1	1	1	1	1	1	No
1084	1	Yes	61.5479	>=60	Male	Primary or above	Married	20.6575	0	80	2	1	1	2	2	0.7831	No
2172	1	Yes	57.5507	50-59	Female	High school or above	Married	22.0741	0	70	1	1	1	2	1	0.9161	Yes
3215	1	Yes	55.5808	50-59	Female	Secondary	Married	19.5312	0	70	1	1	1	1	1	1	Yes
2192	1	Yes	70.5562	>=60	Female	Primary or above	Married	22.3703	0	70	3	1	2	3	2	0.6592	Yes
2174	2	Yes	43.5425	40-49	Female	Primary or above	Married	23.1111	0	80	1	1	1	1	1	1	No
3273	1	No	64.5863	>=60	Male	Primary or above	Married	24.6097	0	100	1	1	1	1	1	1	No
2168	1	Yes	56.5507	50-59	Female	Primary or above	Married	22.6409	0	90	1	1	1	1	1	1	No
1044	1	Yes	40.7836	40-49	Male	Secondary	Married	27.102	0	80	1	1	1	1	2	0.9362	Yes-un-diagnosed
2190	1	Yes	55.5479	50-59	Female	Secondary	Divorced	26.0584	0	70	1	1	1	2	2	0.8523	Yes
1470	1	Yes	51.5753	50-59	Male	High school or above	Married	24.2215	0	70	1	1	1	1	1	1	Yes-un-diagnosed
3271	1	Yes	64.5863	>=60	Male	High school or above	Married	22.0386	0	50	1	1	1	1	1	1	Yes-un-diagnosed
1018	1	Yes	52.5342	50-59	Female	Secondary	Married	27.7662	2	80	1	1	1	1	1	1	Yes
1066	1	Yes	42.526	40-49	Female	Secondary		20.5688	0	90	1	1	1	1	1	1	No
1469	1	Yes	57.5781	50-59	Male	High school or above	Married	22.2222	0	75	1	1	1	1	1	1	Yes-un-diagnosed
1024	1	Yes	55.537	50-59	Female	High school or above	Married	23.5556	0	85	1	1	1	1	1	1	Yes
3220	1	Yes	58.5808	50-59	Female	High school or above	Divorced	19.7055	1	80	1	1	1	2	2	0.8523	Yes
1056	1	Yes	50.8685	50-59	Male	High school or above	Married	22.7732	0	50	1	1	1	4	1	0.73	No
1414	1	Yes	42.5671	40-49	Female	Primary or above	Married	20.1348	0	100	1	1	1	1	1	1	No
1047	1	Yes	45.5288	40-49	Male	High school or above	Married	25.8645	0	60	5	1	1	2	2	0.4762	Yes
3276	1	Yes	64.5863	>=60	Male	Primary or above	Married	20.1956	1	80	1	1	1	1	1	1	Yes-un-diagnosed
1051	1	Yes	53.5342	50-59	Male	High school or above	Married	20.3125	0	80	1	1	1	1	1	1	No
1059	1	Yes	52.3863	50-59	Male	Secondary	Married	21.83	0		1	1	1	1	1	1	Yes
1029	1	Yes	52.9863	50-59	Female	High school or above	Married	26.4855	0	90	1	1	1	1	1	1	Yes
1003	1	Yes	68.5562	>=60	Female	High school or above	Married	23.74	1	90	1	1	1	1	1	1	Yes
3219	1	Yes	51.5753	50-59	Female	High school or above	Married	23.634	0	70	1	1	1	2	1	0.9161	No
1475	1	Yes	61.5808	>=60	Male	High school or above	Married	21.9363	1	80	1	1	1	1	1	1	Yes
3247	1	Yes	45.5726	40-49	Male	High school or above	Married	19.2336	0	95	1	1	1	1	1	1	No
2164	1	Yes	53.5452	50-59	Female	Secondary	Single	23.1247	0	70	1	1	1	2	2	0.8523	Yes-un-diagnosed
2163	1	Yes	58.5479	50-59	Female	High school or above	Married	25.462	0	90	1	1	1	1	1	1	No
1032	1	Yes	56.5452	50-59	Female	High school or above	Divorced	32.0513	0	90	1	1	1	1	1	1	Yes
1445	1	Yes	73.589	>=60	Female	Primary or above	Married	24.7475	0	80	1	1	1	1	1	1	Yes
2316	1	Yes	48.5753	40-49	Male	Secondary	Married	23.1405	0	70	1	1	1	1	1	1	Yes-un-diagnosed
3277	1	Yes	69.589	>=60	Male	High school or above	Married	25.8645	0	65	1	1	1	1	1	1	Yes
1484	1	Yes	61.5808	>=60	Male	High school or above	Married	23.8751	3	60	1	1	1	1	1	1	Yes
2212	1	Yes	42.5397	40-49	Male	Secondary	Single	21.9671	0	80	1	1	1	1	1	1	Yes
1468	1	Yes	55.5781	50-59	Male	High school or above	Married	24.5675	0	90	1	1	1	1	1	1	Yes-un-diagnosed
2203	1	Yes	59.5507	50-59	Male	Primary or above	Married	25.3906	0	90	1	1	1	1	1	1	Yes
1009	1	Yes	64.5425	>=60	Female	Primary or above	Married	28.125	0	100	1	1	1	1	1	1	Yes-un-diagnosed
3214	1	Yes	58.5808	50-59	Female	High school or above	Married	24.8889	0	100	1	1	1	1	1	1	No
1456	1	Yes	45.5699	40-49	Male	High school or above	Married	21.3039	0	90	1	1	1	1	1	1	No
2181	1	Yes	45.5425	40-49	Female	Primary or above	Married	21.4031	0	95	1	1	1	1	1	1	No
3227	1	Yes	63.5836	>=60	Female	Secondary	Married	28.7201	0	50	1	1	1	2	1	0.9161	No
3221	1	Yes	57.5781	50-59	Female	Primary or above	Single	22.006	0	70	1	1	1	1	1	1	Yes
3223	1	Yes	58.5808	50-59	Female	Primary or above	Married	25.3906	0	90	1	1	1	1	1	1	Yes
1463	1	Yes	56.0603	50-59	Male	High school or above	Married	22.3214	0	95	1	1	1	1	1	1	Yes-un-diagnosed
2184	1	Yes	40.5397	40-49	Female	Primary or above	Single	21.3599	0		1	1	1	1	1	1	No
3235	1	No	71.5918	>=60	Female	Primary or above	Married	24.4444	1	60	4	4	4	4	3	0.0905	Yes
3229	1	Yes	60.5836	>=60	Female	Secondary	Married	22.6659	0	60	1	1	1	1	1	1	Yes
2162	1	Yes	74.5589	>=60	Male	Primary or above	Single	21.3333	0	100	1	1	1	1	1	1	Yes
1019	1	Yes	52.5342	50-59	Female	High school or above	Married	29.903	0	70	1	1	1	1	1	1	Yes
1050	1	Yes	49.6932	40-49	Male	High school or above	Married	23.7954	0	80	1	1	1	1	1	1	No
2227	1	Yes	57.5507	50-59	Male	Secondary	Married	22.0386	0	80	1	1	1	1	1	1	No
3243	1	Yes	47.5753	40-49	Male	High school or above	Married	26.4463	0	85	1	1	1	1	2	0.9362	Yes
3265	1	Yes	54.5781	50-59	Male	High school or above	Married	21.3578	0	70	1	1	1	2	1	0.9161	Yes-un-diagnosed
1021	1	Yes	58.5452	50-59	Female	Secondary	Divorced	21.7193	0	80	1	1	1	1	1	1	No
3278	1	Yes	63.5863	>=60	Male	High school or above	Married	22.9421	0	80	1	1	1	1	1	1	Yes
3249	1	Yes	41.5699	40-49	Male	Primary or above	Married	25.9095	0	80	1	1	1	2	1	0.9161	No
1079	1	Yes	68.5534	>=60	Male	Secondary	Married	19.8914	0	60	1	1	1	1	1	1	No
1041	1	Yes	48.5425	40-49	Male	High school or above	Married	25.5102	0	80	1	1	1	1	1	1	Yes
1073	1	Yes	43.537	40-49	Female	High school or above	Married	20.3125	0	80	1	1	1	1	1	1	No
2202	1	Yes	71.5616	>=60	Male	High school or above	Married	21.4844	0	100	1	1	1	1	1	1	Yes
3206	1	Yes	43.5726	40-49	Female	Secondary	Married	21.8522	0	80	1	1	1	2	1	0.9161	No
2186	1	Yes	43.5425	40-49	Female	Secondary	Single	22.4766	0	80	1	1	1	1	1	1	No
3269	1	No	78.5945	>=60	Male	Primary or above	Married	21.6441	1	90	1	1	1	1	1	1	Yes
1057	1	Yes	56.5452	50-59	Male	High school or above	Married	20.2449	0	95	1	1	1	1	1	1	No
2210	1	No	64.5562	>=60	Male	Secondary	Married	18.2563	0	80	1	1	1	1	1	1	No
1441	1	Yes	64.5836	>=60	Female	Secondary	Married	22.8928	0	70	1	1	1	2	1	0.9161	Yes
1430	1	Yes	57.7425	50-59	Female	Primary or above	Divorced	23.2834	0	100	1	1	1	1	1	1	Yes
1412	1	Yes	49.5726	40-49	Female	High school or above	Married	25.711	0	60	1	1	1	1	1	1	No
1477	1	Yes	70.5863	>=60	Male	Secondary	Married	23.4375	2	70	1	1	1	1	1	1	Yes
1444	1	Yes	61.5808	>=60	Female	Secondary	Married	25.6837	0	50	1	1	1	1	1	1	Yes
2198	2	Yes	71.5589	>=60	Female	High school or above	Married	20.5442	1	100	1	1	1	1	1	1	Yes
1037	1	Yes	49.5425	40-49	Male	High school or above	Married	20.3125	0	75	1	1	1	1	1	1	No
1081	1	Yes	60.5507	>=60	Male	Secondary	Married	18.3391	0	70	1	1	1	1	1	1	Yes
2221	1	Yes	47.5452	40-49	Male	Primary or above	Single	24.2215	0	100	1	1	1	1	1	1	Yes
1449	1	Yes	40.5671	40-49	Male	Secondary	Married	22.7732	0	90	1	1	1	2	1	0.9161	Yes-un-diagnosed
3279	1	Yes	73.5918	>=60	Male	Secondary	Married	20.4491	0	70	1	1	1	1	1	1	No
3264	2	Yes	53.5781	50-59	Male	Primary or above	Married	20.3125	0	80	2	1	1	1	1	0.9308	No
1033	1	Yes	59.5479	50-59	Female	High school or above	Divorced	23.1111	0	100	1	1	1	1	1	1	No
3252	1	Yes	49.5753	40-49	Male	High school or above	Married	22.0581	0	70	1	1	1	1	1	1	Yes
1014	1	Yes	63.5425	>=60	Female	High school or above	Married	23.0112	0	70	1	1	1	1	1	1	Yes
1067	1	Yes	39.9616	40-49	Female	High school or above	Married	21.6441	0	90	1	1	1	2	1	0.9161	Yes
1060	1	Yes	53.6	50-59	Male	Secondary	Married	27.3437	0	90	1	1	1	1	1	1	Yes
1035	2	Yes	48.5425	40-49	Male	Primary or above	Married	25.6874	1	60	1	1	1	2	2	0.8523	Yes
1440	1	Yes	61.5808	>=60	Female	Secondary	Divorced	26.1593	0	70	1	1	1	1	2	0.9362	Yes
1017	1	Yes	60.5397	>=60	Female	Primary or above	Married	16.8889	0	60	1	1	1	3	2	0.7841	Yes
1427	1	Yes	54.5753	50-59	Female	High school or above	Married	21.3333	0	40	1	1	1	1	1	1	No
1466	1	No	55.5781	50-59	Male	Primary or above	Married	20.0692	0	70	1	1	1	1	1	1	No
1422	1	Yes	47.5726	40-49	Female	Secondary	Married	20.7967	0	70	1	1	1	1	1	1	No
1071	1	Yes	42.5836	40-49	Female	Primary or above	Single	16.8889	2	50	1	1	1	1	1	1	No
1418	1	Yes	42.5671	40-49	Female	Secondary	Married	22.2222	0	90	1	1	1	1	1	1	No
3272	1	Yes	76.5945	>=60	Male	Secondary	Married	22.7732	1	70	2	1	1	2	1	0.8469	Yes
2318	2	Yes	52.5781	50-59	Male	Primary or above	Married	23.3887	0	50	1	1	1	1	1	1	Yes
1482	1	Yes	72.589	>=60	Male	High school or above	Married	21.3333	0	70	1	1	1	1	1	1	Yes
3241	1	Yes	46.5726	40-49	Male	Secondary	Divorced	31.2213	0	60	1	1	1	1	1	1	No
2169	1	Yes	59.5534	50-59	Female	High school or above	Single	21.3333	2	85	1	1	1	2	1	0.9161	Yes
3250	1	Yes	49.5753	40-49	Male	Secondary	Married	23.5294	0	80	1	1	1	1	1	1	Yes-un-diagnosed
1476	1	Yes	72.589	>=60	Male	High school or above	Married	26.986	2	80	3	1	1	4	1	0.6515	Yes
3256	1	Yes	52.5781	50-59	Male	Primary or above	Married	26.4463	1	80	1	1	1	1	1	1	Yes
3255	1	Yes	54.5753	50-59	Male	Secondary	Married	20.7967	0	60	1	1	1	1	1	1	No
3244	1	Yes	47.5753	40-49	Male	Primary or above	Married	26.9598	0	75	1	1	1	1	1	1	No
1039	1	Yes	45.5397	40-49	Male	High school or above	Married	23.3067	0	85	1	1	1	1	1	1	No
1038	1	Yes	41.537	40-49	Male	Primary or above	Married	32.41	1	60	1	1	1	1	1	1	Yes
1450	1	Yes	47.5726	40-49	Male	Secondary	Married	26.3656	1	70	1	1	1	2	2	0.8523	Yes
2193	1	No	62.5452	>=60	Female	Secondary	Single	19.563	1	50	1	1	1	2	2	0.8523	Yes
1453	1	Yes	40.5671	40-49	Male	High school or above	Married	24.4646	0	80	1	1	1	1	1	1	Yes-un-diagnosed
3228	1	Yes	77.5945	>=60	Female	Primary or above	Divorced	28	1	80	1	1	1	1	1	1	Yes
3210	1	Yes	47.5753	40-49	Female	Secondary	Married	22.4323	0	80	1	1	1	2	1	0.9161	No
2191	1	Yes	74.5589	>=60	Female	High school or above		20.8889	0	70	1	1	1	2	2	0.8523	Yes
3201	1	Yes	45.5726	40-49	Female	Secondary	Married	22.6667	0	80	1	1	1	1	1	1	No
1479	1	Yes	63.5836	>=60	Male	Secondary	Married	23.8751	2	70	1	1	1	2	1	0.9161	Yes
1002	1	Yes	81.5534	>=60	Female	High school or above	Married	20.2848	1	85	1	1	1	1	1	1	Yes
2166	1	Yes	55.5507	50-59	Female	High school or above	Married	21.3675	0	95	1	1	1	1	1	1	No
1020	1	Yes	58.5233	50-59	Female	High school or above	Married	24.7582	0	90	1	1	1	2	1	0.9161	Yes
2175	1	Yes	44.5425	40-49	Female	Primary or above	Married	28.0618	2	80	1	1	1	1	1	1	Yes
1072	1	Yes	47.5397	40-49	Male	Primary or above	Married	27.5556	0	75	1	1	1	1	1	1	No
1070	1	Yes	40.7644	40-49	Female	High school or above	Married	23.3091	0	80	1	1	1	1	1	1	No
1077	1	Yes	72.337	>=60	Male	High school or above	Married	22.6207	0	70	1	1	1	1	1	1	No
3262	1	Yes	56.5808	50-59	Male	Primary or above	Married	23.5883	6	10	1	1	1	4	1	0.73	Yes
3253	1	Yes	54.5781	50-59	Male	Secondary	Married	18.9388	0	70	1	1	1	1	1	1	Yes
1455	1	Yes	40.5671	40-49	Male	High school or above	Married	25.3906	0	80	1	1	1	1	1	1	No
3270	1	Yes	62.5808	>=60	Male	High school or above	Married	26.7698	1	75	1	1	1	1	1	1	Yes
2216	1	Yes	47.5425	40-49	Male	High school or above	Married	24.974	0	80	1	1	1	1	1	1	No
3217	1	Yes	59.5836	50-59	Female	Primary or above	Married	22.6667	0	80	1	1	1	1	1	1	Yes-un-diagnosed
2207	1	Yes	71.5589	>=60	Male	Secondary	Married	26.6728	1	80	1	1	1	1	1	1	Yes
3237	1	Yes	68.589	>=60	Female	Primary or above	Married	24	0	70	1	1	1	1	1	1	Yes
1046	1	Yes	41.526	40-49	Male	High school or above	Married	37.1823	1	30	1	1	1	1	2	0.9362	Yes-un-diagnosed
1011	1	Yes	65.6712	>=60	Female	Primary or above	Married	27.5873	1	70	2	1	1	2	2	0.7831	Yes
3222	1	Yes	51.5781	50-59	Female	Secondary	Married	24.6094	0	80	1	1	1	1	1	1	No
3236	1	Yes	77.5945	>=60	Female	High school or above	Married	22.2222	0	60	3	2	2	2	2	0.6846	Yes
1048	1	Yes	58.526	50-59	Male	Primary or above	Single	22.2222	0	70	2	1	1	1	1	0.9308	Yes
1416	1	Yes	48.5726	40-49	Female	Secondary	Married	26.2227	1	70	1	1	1	2	1	0.9161	No
2220	1	Yes	44.5425	40-49	Male	Primary or above	Married	21.0937	0	50	1	1	1	1	1	1	No
2196	1	Yes	60.5507	>=60	Female	Secondary	Married	23.3091	2	100	1	1	1	1	1	1	Yes
1074	1	Yes	41.1178	40-49	Female	Primary or above	Married	24.7325	0	70	1	1	1	2	1	0.9161	No
1008	1	No	77.5507	>=60	Female	Primary or above	Divorced	20.1726	0	80	1	1	1	1	1	1	No
1061	1	Yes	53.4575	50-59	Male	High school or above	Married	22.2222	0	90	1	1	1	1	1	1	No
3218	1	Yes	57.5808	50-59	Female	Primary or above	Married	24.5243	0	80	1	1	1	1	1	1	No
2182	1	Yes	48.5452	40-49	Female	Secondary	Married	70	0	70	1	1	1	2	1	0.9161	Yes
1481	2	Yes	80.5945	>=60	Male	Primary or above	Married	24.4418	1	75	1	1	1	1	1	1	Yes
1462	1	Yes	64.5836	>=60	Male	High school or above	Married	23.7118	1	70	1	1	1	1	1	1	Yes
2165	1	Yes	58.5479	50-59	Female	High school or above	Married	21.4031	0	70	1	1	1	1	1	1	Yes
1034	1	Yes	47.5397	40-49	Male	Primary or above	Divorced	16.8889	0	95	3	1	1	1	1	0.9215	No
1026	1	Yes	56.537	50-59	Female	Primary or above	Married	22.6667	0	70	1	1	1	2	2	0.8523	No
2222	1	Yes	48.5452	40-49	Male	Primary or above	Married	17.9687	0	90	1	1	1	1	1	1	Yes-un-diagnosed
2219	1	Yes	49.5425	40-49	Male	Primary or above	Married	22.9421	0	70	1	1	1	2	1	0.9161	Yes
3233	1	Yes	62.5836	>=60	Female	High school or above	Married	20.8117	4	50	1	1	1	1	2	0.9362	Yes
1435	1	Yes	51.5753	50-59	Female	High school or above	Married	22.2137	0	70	1	1	1	1	1	1	No
3268	1	Yes	76.5945	>=60	Male	High school or above	Married	27.1809	0	40	1	1	1	2	1	0.9161	Yes
1417	1	Yes	44.5699	40-49	Female	Secondary	Single	23.7118	0	90	1	1	1	1	1	1	No
1055	1	Yes	57.8767	50-59	Male	High school or above	Married	22.2656	0	80	1	1	1	1	1	1	No
3275	1	No	72.5918	>=60	Male	Primary or above	Married	25.3906	2	90	1	1	1	1	1	1	Yes
1438	1	Yes	60.6027	>=60	Female	High school or above	Married	23.4375	0	70	1	1	1	1	1	1	No
1415	1	Yes	45.5699	40-49	Female	Secondary	Divorced	21.7555	0	80	1	1	1	1	1	1	No
1027	1	Yes	58.8301	50-59	Female	Primary or above	Married	18.7305	0	70	1	1	1	1	1	1	Yes
1447	1	Yes	41.5671	40-49	Male	High school or above	Married	23.7954	0	80	1	1	1	1	1	1	No
3247	1	Yes	40.5699	40-49	Male	High school or above	Married	26.5629	2	65	1	1	1	1	1	1	Yes-un-diagnosed
1053	1	Yes	51.5425	50-59	Male	Secondary	Married	24.8591	0	70	1	1	1	1	1	1	Yes-un-diagnosed
1078	1	Yes	60.5479	>=60	Male	Secondary	Married	24.5675	1	80	1	1	1	1	1	1	Yes
3260	1	Yes	59.5808	50-59	Male	High school or above	Married	21.3039	0	50	1	1	1	1	1	1	Yes-un-diagnosed
2176	1	Yes	43.5425	40-49	Female	High school or above	Married	22.9421	0	95	1	1	1	1	1	1	No
3202	1	Yes	41.5699	40-49	Female	High school or above	Married	21.5019	0	70	1	1	1	1	1	1	Yes
2211	1	Yes	60.5534	>=60	Male	Secondary	Married	22.4913	0	80	1	1	1	1	1	1	Yes-un-diagnosed
2196	1	Yes	63.5534	>=60	Female	High school or above	Married	23.833	0	75	1	1	1	1	1	1	Yes
3254	1	No	57.5808	50-59	Male	Secondary	Divorced	20.4444	1	80	3	1	1	1	1	0.9215	Yes
1087	1	Yes	67.8658	>=60	Male	High school or above	Married	20.9566	1	60	1	1	1	1	1	1	No
2189	1	Yes	55.5479	50-59	Female	High school or above	Married	27.7671	0	70	4	1	1	2	1	0.7097	No
1000	1	Yes	62.8027	>=60	Female	Primary or above	Married	24.4444	0	70	1	1	1	1	1	1	Yes
2323	1	Yes	50.5753	50-59	Male	Primary or above	Single	19.4674	0	75	1	1	1	1	2	0.9362	No
3231	1	Yes	61.5836	>=60	Female	High school or above	Married	173.788	0	55	1	1	1	2	1	0.9161	No
1049	1	Yes	54.6959	50-59	Male	High school or above	Married	21.2183	0	70	1	1	1	2	1	0.9161	Yes-un-diagnosed
3212	1	Yes	59.5836	50-59	Female	Secondary	Married	28.0404	0	80	1	1	1	1	1	1	Yes
3204	1	Yes	48.5753	40-49	Female	High school or above	Married	21.5019	0	60	1	1	1	2	1	0.9161	Yes-un-diagnosed
1472	1	Yes	56.5781	50-59	Male	Primary or above	Married	23.2254	0	80	1	1	1	1	1	1	Yes
1451	1	Yes	41.5671	40-49	Male	Secondary	Married	27.4348	0	90	1	1	1	1	1	1	No
2214	1	Yes	40.5397	40-49	Male	High school or above	Married	20.7612	0	80	1	1	1	1	1	1	Yes-un-diagnosed
1478	1	Yes	71.589	>=60	Male	High school or above	Divorced	26.5625	0	50	1	1	1	1	1	1	Yes
1425	1	Yes	58.5781	50-59	Female	Primary or above	Divorced	27.8876	0	70	1	1	1	2	1	0.9161	Yes
3257	1	No	57.5808	50-59	Male	Primary or above	Married	22.2656	0	80	3	2	2	1	1	0.8323	No
1005	1	Yes	76.5507	>=60	Female	Primary or above	Divorced	22.83	2	50	1	1	1	4	1	0.73	Yes
2206	1	Yes	65.5534	>=60	Male	High school or above	Married	22.4323	0	90	1	1	1	1	1	1	No
1054	1	Yes	52.6438	50-59	Male	Secondary	Married	18.3768	0	80	1	1	1	1	1	1	No
1458	1	Yes	41.5671	40-49	Male	Primary or above	Married	28.3737	0	80	1	1	1	1	1	1	No
3213	1	Yes	58.5808	50-59	Female	High school or above	Married	23.3091	0	50	2	1	1	2	1	0.8469	No
2200	1	Yes	82.5644	>=60	Female	Primary or above	Divorced	20	0	35	2	2	1	2	1	0.8041	Yes
2228	1	Yes	52.5452	50-59	Male	High school or above	Married	23.9512	0	85	1	1	1	2	1	0.9161	No
1069	1	Yes	48.2329	40-49	Female	High school or above	Married	23.1111	0	90	2	1	1	2	2	0.7831	No
2218	1	Yes	42.5397	40-49	Male	High school or above	Married	21.8776	0	90	1	1	1	1	1	1	No
2173	1	Yes	58.5507	50-59	Female	Secondary	Married	20.3125	0	80	1	1	1	1	1	1	No
1013	1	Yes	59.4959	50-59	Female	Primary or above	Married	29.1363	1	80	2	1	1	2	1	0.8469	Yes
1410	1	Yes	45.5699	40-49	Female	Primary or above	Married	20	0	80	1	1	1	1	1	1	No
2201	1	Yes	65.5562	>=60	Male	Secondary	Married	24.1288	1	80	1	1	1	1	1	1	No
2188	1	Yes	46.5425	40-49	Female	High school or above	Single	21.7738	0	88	1	1	1	2	1	0.9161	No
2217	1	Yes	49.5452	40-49	Male	High school or above	Single	22.7204	0	70	1	1	1	1	1	1	No
2177	1	Yes	41.537	40-49	Female	High school or above	Married	21.875	0	70	1	1	1	1	1	1	No
1424	1	Yes	50.5726	50-59	Female	Secondary	Married	24.974	0	80	1	1	1	1	1	1	No
2315	1	Yes	48.5753	40-49	Male	Secondary	Single	21.5139	0	65	1	1	1	1	1	1	Yes-un-diagnosed
1345	1	Yes	59.5781	50-59	Female	Primary or above	Married	21.2279	0	85	1	1	1	1	1	1	Yes
2266	1	Yes	58.5616	50-59	Male	Primary or above	Married	23.0112	0	90	1	1	1	1	1	1	Yes-un-diagnosed
2355	1	Yes	41.5616	40-49	Male	Primary or above	Divorced	22.7732	0	85	1	1	1	1	1	1	Yes-un-diagnosed
1371	1	Yes	40.5644	40-49	Male	High school or above	Married	28.3937	0	100	1	1	1	1	1	1	Yes
2003	2	Yes	50.5534	50-59	Female	Primary or above	Married	21.4844	0	90	1	1	1	1	1	1	No
2376	1	No	67.5808	>=60	Male	Secondary	Married	23.8367	1	90	1	1	1	1	1	1	No
2326	1	Yes	66.5753	>=60	Male	Primary or above	Married	17.6309	0	70	1	1	1	1	1	1	No
2258	1	Yes	51.5589	50-59	Male	Primary or above	Married	24.2215	0	95	1	1	1	1	1	1	No
2375	1	Yes	60.5753	>=60	Male	Primary or above	Married	25.0995	0	95	1	1	1	1	1	1	Yes-un-diagnosed
1340	1	Yes	47.5699	40-49	Female	Primary or above	Married	23.1111	1	80	1	1	1	1	1	1	No
1394	1	No	58.5753	50-59	Male	Secondary	Married	22.5896	1	70	1	1	1	2	1	0.9161	No
2294	1	Yes	45.5534	40-49	Female	Primary or above	Married	20.5693	0	85	1	1	1	1	1	1	No
2241	1	Yes	51.5589	50-59	Female	Primary or above	Divorced	21.4844	1	80	1	1	1	2	4	0.7448	No
1400	1	Yes	67.5836	>=60	Male	High school or above	Married	17.9931	0	80	1	1	1	2	1	0.9161	No
2363	1	Yes	51.5699	50-59	Female	Primary or above	Divorced	24.6094	0	80	1	1	1	2	1	0.9161	No
2272	1	Yes	55.5616	50-59	Male	Primary or above	Married	16.1354	0	50	1	1	1	2	1	0.9161	No
2067	1	Yes	58.2466	50-59	Male	Primary or above	Married	22.7615	0	80	1	1	1	1	1	1	Yes
1405	1	No	61.5781	>=60	Male	Secondary	Married	20.83	0	50	2	1	1	1	1	0.9308	No
1334	2	Yes	49.5699	40-49	Female	Primary or above	Single	22.3674	0	75	1	1	1	1	1	1	No
2297	1	Yes	45.5123	40-49	Female	Primary or above	Married	23.4221	0	70	1	1	1	1	1	1	No
1385	1	Yes	53.5726	50-59	Male	Primary or above	Married	23.3887	0	70	1	1	1	2	1	0.9161	No
2276	1	Yes	67.5699	>=60	Male	Primary or above	Married	21.4533	1	90	1	1	1	1	1	1	Yes
2060	1	Yes	60.5616	>=60	Male	Primary or above	Married	22.6562	1	80	1	1	1	1	1	1	Yes-un-diagnosed
2259	1	Yes	51.5589	50-59	Male	Secondary	Married	29.7339	0	70	1	1	1	1	1	1	Yes
2251	1	Yes	49.5562	40-49	Male	Secondary	Married	28.3604	0	80	1	1	1	1	1	1	Yes
2042	1	Yes	43.5507	40-49	Female	High school or above	Divorced	22.806	0	100	1	1	1	1	1	1	No
1341	1	Yes	49.5699	40-49	Female	High school or above	Divorced	25.3906	2	70	2	1	1	2	2	0.7831	Yes
1384	1	No	56.5753	50-59	Male	High school or above	Divorced	25.0995	1	50	5	1	1	1	1	0.6239	Yes-un-diagnosed
1392	1	Yes	54.5726	50-59	Male	Secondary	Single	30.854	1	95	1	1	1	1	1	1	Yes
2037	1	Yes	48.5534	40-49	Male	Primary or above	Married	23.8751	3	70	2	1	1	1	1	0.9308	Yes
2008	1	Yes	58.0082	50-59	Female	Primary or above	Divorced	24.0344	0	50	1	1	1	2	1	0.9161	Yes-un-diagnosed
2075	1	Yes	52.5562	50-59	Male	Secondary	Married	21.8724	0	60	1	1	1	1	1	1	No
2394	1	No	73.5836	>=60	Female	Secondary	Divorced	23.4952	0	90	1	1	1	1	1	1	Yes
1407	1	Yes	71.5863	>=60	Male	Primary or above	Married	23.8751	1	60	2	1	1	1	1	0.9308	No
2352	1	Yes	46.5644	40-49	Male	Primary or above	Single	19.1953	0	90	1	1	1	1	1	1	Yes-un-diagnosed
2040	1	Yes	44.5507	40-49	Female	Secondary	Married	29.3847	0	80	1	1	1	1	2	0.9362	Yes
2054	1	Yes	40.7507	40-49	Female	Secondary	Married	22.0317	0	50	1	1	1	1	1	1	Yes-un-diagnosed
1401	1	No	80.5918	>=60	Male	Primary or above	Married	22.83	1	50	2	2	2	2	2	0.6939	Yes
2284	1	Yes	60.5644	>=60	Male	Primary or above	Divorced	29.1363	0	75	1	1	1	2	1	0.9161	Yes-un-diagnosed
2384	1	Yes	72.5836	>=60	Female	Primary or above	Married	23.4375	0	60	1	1	1	1	2	0.9362	Yes
2028	1	Yes	60.5616	>=60	Female	Primary or above	Married	24.4444	0	70	1	1	1	1	1	1	Yes
2369	1	No	57.5726	50-59	Female	Secondary	Married	27.0552	2	80	1	1	1	1	1	1	Yes
2307	1	Yes	78.5753	>=60	Female	Primary or above	Divorced	19.9792	0	80	1	1	1	1	1	1	Yes
2252	1	Yes	48.5562	40-49	Male	Primary or above	Married	20.3954	0	70	2	1	1	1	3	0.8182	Yes-un-diagnosed
2261	1	Yes	58.5616	50-59	Male	Primary or above	Married	22.9854	1	70	1	1	1	1	1	1	No
2263	1	Yes	50.5562	50-59	Male	High school or above	Married	20.7031	0	70	1	1	1	2	1	0.9161	Yes-un-diagnosed
2275	1	No	66.5671	>=60	Male	Primary or above	Married	13.8408	0	30	1	1	1	2	1	0.9161	No
2255	2	Yes	42.5507	40-49	Male	Primary or above	Married	22.9854	0	60	1	1	1	1	1	1	Yes
1391	1	Yes	52.5726	50-59	Male	Primary or above	Married	24.974	0	50	2	1	1	2	4	0.6756	Yes
2056	1	Yes	67.1288	>=60	Male	High school or above	Divorced	23.03	1	50	2	1	1	1	1	0.9308	Yes
2070	1	Yes	52.0164	50-59	Male	Secondary	Married	30.7787	2	80	1	1	1	1	2	0.9362	Yes
2377	1	Yes	64.5781	>=60	Male	High school or above	Married	19.721	0	60	1	1	1	1	1	1	No
2296	1	Yes	40.5507	40-49	Female	Secondary	Married	22.5069	0	60	1	1	1	3	2	0.7841	Yes
1343	2	Yes	52.5726	50-59	Female	Secondary	Married	20.5761	0	80	1	1	1	1	1	1	Yes-un-diagnosed
1358	1	Yes	60.5781	>=60	Female	Primary or above	Married	24.5578	0	80	1	1	1	1	1	1	No
2041	1	Yes	42.9534	40-49	Female	Primary or above	Married	19.2344	0	100	1	1	1	1	1	1	Yes
2239	1	Yes	57.5616	50-59	Female	Primary or above	Divorced	28.8889	0	100	1	1	1	1	1	1	Yes
2240	1	Yes	53.1452	50-59	Female	High school or above	Divorced	22.3948	0	80	1	1	1	1	1	1	No
2349	1	Yes	47.5671	40-49	Male	High school or above	Single	20.2812	0	80	1	1	1	1	1	1	No
2237	1	Yes	55.5616	50-59	Female	Primary or above	Married	22.8928	0	40	1	1	1	2	1	0.9161	Yes
2368	1	Yes	50.5671	50-59	Female	Primary or above	Divorced	17.7778	0	100	1	1	1	1	1	1	No
1378	1	Yes	47.5699	40-49	Male	Primary or above	Married	25.3906	0	90	1	1	1	1	2	0.9362	Yes
2341	1	No	50.5671	50-59	Male	Primary or above	Married	18.9292	1	60	1	1	1	1	1	1	Yes-un-diagnosed
2354	1	Yes	47.5671	40-49	Male	Secondary	Married	22.4323	0	90	1	1	1	1	1	1	No
2344	1	Yes	49.5671	40-49	Male	Secondary	Married	26.0375	0	50	1	1	1	3	1	0.8479	Yes
2327	1	No	51.5699	50-59	Male	Primary or above	Married	25.3906	2	70	1	1	1	1	1	1	Yes
1349	1	Yes	49.8493	40-49	Female	Secondary	Married	21.4844	0	70	1	1	1	1	1	1	No
1388	1	Yes	51.5726	50-59	Male	Secondary	Married	26.6193	1	85	1	1	1	1	1	1	Yes
1381	1	Yes	47.5699	40-49	Male	Secondary	Married	23.03	0	70	1	1	1	1	1	1	Yes-un-diagnosed
1344	1	Yes	54.5726	50-59	Female	Primary or above	Married	22.2222	0	100	1	1	1	1	2	0.9362	No
2345	1	Yes	48.5644	40-49	Male	Primary or above	Married	23.8751	0	70	1	1	1	1	1	1	No
2279	1	No	71.5726	>=60	Male	Primary or above	Married	26.9274	0	80	1	1	1	1	2	0.9362	Yes
1332	1	Yes	43.5671	40-49	Female	Secondary	Married	28.3039	0	80	1	1	1	2	1	0.9161	No
2002	1	Yes	56.5589	50-59	Female	Primary or above	Married	22.5466	1	70	1	1	1	1	1	1	No
2260	1	Yes	59.5644	50-59	Male	Primary or above	Married	25.8478	0	100	1	1	1	1	1	1	Yes-un-diagnosed
1403	1	Yes	70.5836	>=60	Male	Primary or above	Married	16.4062	0	60	1	1	1	1	1	1	Yes
2325	1	Yes	54.5699	50-59	Male	Primary or above	Divorced	25.3155	0	50	1	1	1	1	1	1	No
2373	1	Yes	61.5753	>=60	Male	Secondary	Married	25.2363	0	70	1	1	1	1	1	1	No
1351	1	Yes	58.5753	50-59	Female	High school or above	Married	26.0584	0	80	2	1	1	1	1	0.9308	Yes
2342	1	No	57.5726	50-59	Male	Secondary	Married	22.5827	1	80	1	1	1	1	1	1	Yes-un-diagnosed
1347	1	Yes	50.2986	50-59	Female	Primary or above	Divorced	19.8141	0	85	1	1	1	1	1	1	No
1333	1	Yes	48.5699	40-49	Female	Secondary	Married	20.3954	0	60	1	1	1	1	1	1	No
2361	1	No	59.5753	50-59	Female	Primary or above	Divorced	27.5556	1	75	3	1	1	1	1	0.9215	Yes
2274	1	No	68.5699	>=60	Male	Primary or above	Married	16.5289	0	70	1	1	1	1	1	1	No
1406	1	Yes	67.5836	>=60	Male	Secondary	Married	23.1405	0	85	1	1	1	1	1	1	Yes
2262	1	Yes	59.5644	50-59	Male	Primary or above	Married	25.6369	0	100	1	1	1	1	1	1	Yes
2038	1	Yes	43.8603	40-49	Male	Secondary	Married	24.1288	0	90	1	1	1	1	1	1	Yes
1359	1	Yes	65.5808	>=60	Female	High school or above	Married	28.1479	2	70	1	1	1	1	1	1	Yes
1346	1	Yes	52.5726	50-59	Female	Primary or above	Married	24.1415	0	90	2	1	1	2	2	0.7831	Yes
2346	1	Yes	41.5616	40-49	Male	Primary or above	Married	23.4586	0	90	1	1	1	1	1	1	No
1402	1	No	71.5863	>=60	Male	Secondary	Married	23.7118	2	75	1	1	1	1	1	1	No
2021	1	Yes	62.5616	>=60	Female	Primary or above	Single	19.025	2	100	2	1	1	1	1	0.9308	Yes
2293	1	Yes	41.5507	40-49	Female	Primary or above	Married	25.204	0	90	1	1	1	1	1	1	No
2285	1	No	77.5863	>=60	Female	Primary or above	Divorced	25.9701	2	70	1	1	1	1	1	1	Yes
2309	1	No	68.5699	>=60	Female	Primary or above	Divorced	26.4855	0	90	2	1	1	2	1	0.8469	No
2308	1	No	69.5699	>=60	Female	Primary or above	Divorced	31.1846	1	50	2	1	1	3	1	0.7787	Yes
2277	1	Yes	60.5644	>=60	Male	Primary or above	Married	19.5717	0	90	1	1	1	1	1	1	No
2290	1	Yes	46.5534	40-49	Female	Primary or above	Married	19.1467	0	70	1	1	1	1	1	1	No
2010	1	Yes	56.5589	50-59	Female	Primary or above	Married	34.2222	0	70	1	1	1	2	2	0.8523	Yes
2333	1	Yes	54.5699	50-59	Male	Secondary	Married	27.614	0	85	1	1	1	1	1	1	Yes-un-diagnosed
2336	1	Yes	55.5726	50-59	Male	Primary or above	Married	21.9289	0	70	1	1	1	1	1	1	No
2380	1	Yes	77.6192	>=60	Male	Primary or above	Married	21.4844	0	45	1	1	1	2	1	0.9161	Yes
2278	1	Yes	65.5671	>=60	Male	Primary or above	Divorced	19.5312	0	60	1	1	1	1	1	1	No
2049	1	Yes	48.811	40-49	Female	Primary or above	Married	22.8928	0	80	1	1	1	1	1	1	No
2281	1	No	69.3041	>=60	Male	Secondary	Married	21.5139	0	80	1	1	1	1	1	1	Yes-un-diagnosed
2039	1	No	47.1836	40-49	Male	High school or above	Married	29.2969	2	95	1	1	1	1	1	1	Yes
2351	1	No	48.5671	40-49	Male	Primary or above	Married	21.2031	0	80	1	1	1	1	1	1	Yes-un-diagnosed
1408	1	No	66.5808	>=60	Male	High school or above	Married	17.9282	0	90	1	1	1	1	1	1	Yes-un-diagnosed
2044	1	Yes	43.5507	40-49	Female	Primary or above	Married	22.0604	0	80	1	1	1	1	1	1	No
2400	1	Yes	48.5671	40-49	Female	Primary or above	Married	18.9181	0	100	1	1	1	1	1	1	No
2350	1	Yes	49.5671	40-49	Female	Primary or above	Married	27.0993	0	70	1	1	1	1	1	1	Yes-un-diagnosed
2404	1	Yes	48.5671	40-49	Female	High school or above	Married	24.9108	0	80	1	1	1	1	1	1	No
1370	1	Yes	49.5699	40-49	Male	Secondary	Married	21.4844	0	70	1	1	1	1	1	1	Yes-un-diagnosed
2306	1	Yes	60.5644	>=60	Male	Primary or above	Married	20.7031	0	60	1	1	1	1	1	1	No
2017	1	Yes	71.5699	>=60	Female	Primary or above	Divorced	23.1111	0	80	1	1	1	1	1	1	Yes-un-diagnosed
2236	1	Yes	59.5644	50-59	Female	Primary or above	Married	26.2227	0	80	1	1	1	1	2	0.9362	No
2269	1	Yes	51.789	50-59	Male	Secondary	Married	18.6453	0	80	1	1	1	1	1	1	No
2392	1	Yes	70.5808	>=60	Female	Secondary	Married	23.4375	0	70	1	1	1	2	1	0.9161	Yes-un-diagnosed
2301	1	Yes	70.5699	>=60	Female	Primary or above	Divorced	21.7555	1	100	1	1	1	1	1	1	Yes
2027	1	Yes	62.7315	>=60	Female	Secondary	Married	25.0657	0	80	1	1	1	1	1	1	Yes
2059	1	Yes	62.5836	>=60	Male	Primary or above	Married	19.5556	0	80	1	1	1	1	1	1	Yes-un-diagnosed
2299	1	Yes	46.5534	40-49	Female	Secondary	Married	25.3333	0	70	1	1	1	1	1	1	Yes
2362	1	Yes	53.5699	50-59	Female	Primary or above	Divorced	24.653	0	80	1	1	1	1	1	1	No
2383	1	Yes	62.5753	>=60	Female	Primary or above	Divorced	29.2101	0	65	1	1	1	1	1	1	Yes
2291	1	Yes	41.5507	40-49	Female	Primary or above	Divorced	23.634	0	80	1	1	1	2	1	0.9161	No
2329	1	No	54.5699	50-59	Male	Primary or above	Married	25.8166	0	90	1	1	1	1	1	1	Yes-un-diagnosed
2249	1	Yes	48.5562	40-49	Male	Primary or above	Married	22.0581	0	10	1	1	1	1	1	1	Yes-un-diagnosed
2401	1	Yes	45.5644	40-49	Female	Secondary	Married	33.3333	0	90	1	1	1	1	1	1	No
2047	1	Yes	47.5534	40-49	Female	Secondary	Divorced	20.3954	0	80	1	1	1	1	1	1	No
2298	1	Yes	47.5562	40-49	Female	Primary or above	Married	29.903	0	50	1	1	1	1	1	1	Yes
2235	1	Yes	58.5616	50-59	Female	Primary or above	Married	23.7253	2	100	1	1	1	1	1	1	Yes-un-diagnosed
2268	1	Yes	52.5589	50-59	Male	Primary or above	Single	20.1956	0	80	1	1	1	1	1	1	No
2304	1	No	69.5699	>=60	Female	High school or above	Divorced	22.5069	2	80	1	1	1	1	1	1	Yes
2046	1	Yes	40.9178	40-49	Female	High school or above	Married	23.6832	0	70	1	1	1	2	1	0.9161	Yes
1379	1	Yes	45.5671	40-49	Male	High school or above	Married	25.2174	0	80	1	1	1	1	1	1	Yes-un-diagnosed
1409	1	No	68.5836	>=60	Male	Primary or above	Married	16.8475	0	60	1	1	1	1	1	1	No
2387	1	Yes	56.5726	50-59	Female	Primary or above	Divorced	26.8386	0	80	1	1	1	1	1	1	Yes
2348	1	No	48.5644	40-49	Male	Primary or above	Married	22.9421	0	80	5	1	1	1	1	0.6239	Yes-un-diagnosed
2019	1	Yes	65.5644	>=60	Female	Primary or above	Divorced	27.0993	0	80	1	1	1	1	1	1	No
1372	1	Yes	44.5671	40-49	Male	Secondary	Married	24.6548	1	60	1	1	1	1	1	1	No
2058	1	No	67.5671	>=60	Male	Primary or above	Married	21.9713	1	100	1	1	1	1	1	1	Yes-un-diagnosed
1357	1	Yes	77.589	>=60	Female	Primary or above	Married	19.5556	0	65	1	1	1	1	1	1	Yes
2025	1	Yes	66.7781	>=60	Female	High school or above	Divorced	21.6441	0	90	1	1	1	1	1	1	Yes
2288	1	Yes	43.5534	40-49	Female	Primary or above	Married	22.0741	0	90	1	1	1	1	1	1	No
2005	1	Yes	58.5918	50-59	Female	Primary or above	Married	20.8117	2	50	1	1	1	1	1	1	Yes
2311	1	Yes	68.789	>=60	Female	Primary or above	Single	22.8329	0	70	2	1	1	2	1	0.8469	Yes
2011	1	Yes	59.5616	50-59	Female	Primary or above	Married	22.3133	0	85	1	1	1	1	1	1	Yes
2243	1	Yes	52.5589	50-59	Female	Primary or above	Married	29.5525	0	50	4	3	3	4	3	0.3063	Yes
2064	1	No	60.0438	>=60	Male	Secondary	Married	28.5156	0	60	1	1	1	1	1	1	Yes
2257	2	Yes	39.674	40-49	Male	Primary or above	Single	24.8016	0	80	1	1	1	1	1	1	No
2061	1	Yes	61.1507	>=60	Male	Secondary	Married	25	1	80	1	1	1	1	1	1	Yes-un-diagnosed
2358	1	Yes	54.5671	50-59	Female	Primary or above	Divorced	32.8889	1	70	1	1	1	1	1	1	Yes
2013	1	Yes	58.9973	50-59	Female	Primary or above	Divorced	24.974	0	60	2	1	1	2	4	0.6756	Yes-un-diagnosed
2340	1	Yes	59.5753	50-59	Male	Primary or above	Married	25.4028	0	80	3	2	1	2	1	0.7948	Yes
2238	1	Yes	59.5644	50-59	Female	Primary or above	Single	26.6667	1	8	2	1	1	2	1	0.8469	Yes
1390	1	No	56.5753	50-59	Male	Secondary	Married	23.5102	0	70	1	1	1	1	1	1	No
1404	1	Yes	60.5781	>=60	Male	High school or above	Married	22.6562	1	60	1	1	1	2	1	0.9161	Yes
2063	1	Yes	61.7397	>=60	Male	Secondary	Married	28.6215	5	60	1	1	1	1	2	0.9362	Yes
1348	1	Yes	54.3014	50-59	Female	Secondary	Divorced	17.898	0	60	1	1	1	1	1	1	No
2069	1	No	55.5589	50-59	Male	Primary or above	Married	22.4913	2	50	1	1	1	1	1	1	Yes
2073	1	No	58.5589	50-59	Male	Primary or above	Married	28.125	1	70	1	1	1	2	1	0.9161	Yes-un-diagnosed
2343	1	Yes	48.5671	40-49	Male	High school or above	Married	19.487	0	98	1	1	1	1	1	1	No
2068	1	No	50.5589	50-59	Male	Secondary	Married	25.7117	0	80	1	1	1	1	1	1	Yes
2332	1	Yes	58.5726	50-59	Male	Secondary	Married	23.7387	0	90	1	1	1	1	1	1	Yes-un-diagnosed
2305	1	Yes	61.5644	>=60	Female	Primary or above	Divorced	26.6667	0	80	1	1	1	1	1	1	Yes-un-diagnosed
2295	2	Yes	44.5534	40-49	Female	Secondary	Married	28.0404	0	100	1	1	1	1	1	1	No
2379	1	Yes	72.5836	>=60	Male	High school or above	Married	24.3375	0	85	1	1	1	1	1	1	Yes
2020	1	No	67.6685	>=60	Female	Secondary	Married	20	0	80	1	1	1	1	1	1	No
2023	1	Yes	61.7288	>=60	Female	Secondary	Married	24.6667	2	50	1	1	1	2	1	0.9161	Yes
2036	1	Yes	47.0603	40-49	Male	Primary or above	Married	28.7105	0	60	1	1	1	1	1	1	No
1393	1	No	55.5781	50-59	Male	Secondary	Single	24.2187	0	50	2	1	1	1	1	0.9308	Yes-un-diagnosed
2257	1	Yes	41.5616	40-49	Male	Primary or above	Single	27.0051	0	75	1	1	1	1	1	1	Yes-un-diagnosed
2338	1	Yes	54.5699	50-59	Male	Secondary	Divorced	21.6296	0	90	1	1	1	1	1	1	No
2280	1	Yes	60.5644	>=60	Male	High school or above	Married	24.2215	0	90	1	1	1	2	1	0.9161	Yes-un-diagnosed
2271	1	Yes	57.5616	50-59	Male	Primary or above	Married	18.4265	0	65	1	1	1	3	1	0.8479	No
2264	1	Yes	58.4301	50-59	Male	High school or above	Married	23.1473	0	92	1	1	1	1	1	1	Yes
2302	1	Yes	62.4301	>=60	Female	High school or above	Divorced	24.6294	0	70	2	1	1	1	1	0.9308	No
2397	1	Yes	47.5671	40-49	Female	Secondary	Married	26.3779	0	70	1	1	1	1	1	1	No
1376	1	Yes	42.5644	40-49	Male	Primary or above	Married	19.8347	0	50	1	1	1	2	1	0.9161	No
2031	1	Yes	42.5479	40-49	Male	Secondary	Married	22.3435	0	100	1	1	1	1	1	1	Yes
2265	1	No	57.8521	50-59	Male	Secondary	Married	16.8962	0	60	5	1	1	2	1	0.54	Yes
2391	1	Yes	65.5781	>=60	Female	Primary or above	Divorced	27.0552	1	80	1	1	1	1	1	1	No
1386	1	No	58.0329	50-59	Male	Secondary	Married	20.5499	1	70	4	4	4	1	1	0.4731	Yes
1352	1	Yes	55.5753	50-59	Female	Primary or above	Married	30.4935	0	100	1	1	1	1	1	1	No
2381	1	Yes	65.8795	>=60	Male	High school or above	Married	23.4375	0	80	1	1	1	1	1	1	Yes
2310	1	Yes	62.5233	>=60	Female	High school or above	Single	22.1893	0	80	1	1	1	1	1	1	Yes
2388	1	No	63.5781	>=60	Female	Primary or above	Married	22.9421	0	60	2	2	2	2	1	0.7577	Yes
2234	1	Yes	50.5562	50-59	Female	Secondary	Divorced	21.4844	0	90	1	1	1	1	1	1	No
2393	1	Yes	65.5781	>=60	Female	Primary or above	Divorced	23.4952	0	65	2	1	1	1	1	0.9308	No
2312	1	Yes	65.4027	>=60	Female	High school or above	Married	21.3675	1	100	1	1	1	1	1	1	No
2360	1	Yes	55.5726	50-59	Female	Secondary	Married	25.4767	0	70	1	1	1	1	1	1	No
2026	1	No	68.7945	>=60	Female	Secondary	Divorced	21.0937	1	80	1	1	1	1	1	1	Yes-un-diagnosed
2300	1	Yes	44.5534	40-49	Female	Primary or above	Married	26.1719	0	85	1	1	1	1	1	1	No
2337	1	Yes	57.5726	50-59	Male	Primary or above	Married	24.6097	0	70	1	1	1	1	1	1	Yes-un-diagnosed
1397	1	Yes	67.5836	>=60	Male	Primary or above	Married	20.0288	0	70	1	1	1	1	1	1	Yes
2372	1	Yes	60.5753	>=60	Male	Primary or above	Married	20.8117	0	80	1	1	1	1	1	1	No
2403	1	Yes	46.5644	40-49	Female	Primary or above	Married	22.6003	0	85	1	1	1	1	1	1	Yes
1374	1	Yes	42.8904	40-49	Male	Secondary	Married	24.7676	0	80	1	1	1	1	1	1	No
2324	1	Yes	57.5726	50-59	Male	Primary or above	Married	25.7117	0	90	1	1	1	1	1	1	Yes
1369	1	Yes	40.5644	40-49	Male	Secondary	Married	24.0238	0	70	1	1	1	1	1	1	Yes
1395	1	Yes	59.5781	50-59	Male	High school or above	Married	24.2424	0	80	1	1	1	1	1	1	Yes
2072	1	Yes	57.4493	50-59	Male	Secondary	Married	28.0428	1	60	1	1	1	1	1	1	Yes
1360	1	Yes	67.9863	>=60	Female	High school or above	Married	22.0386	0	60	1	1	1	1	2	0.9362	Yes
2287	1	Yes	47.5562	40-49	Female	Primary or above	Married	25.3333	0	70	1	1	1	1	1	1	No
1339	1	Yes	41.5644	40-49	Female	High school or above	Married	20	1	60	1	1	1	3	1	0.8479	No
2382	1	No	76.5863	>=60	Male	Secondary	Married	24.6097	0	80	1	1	1	1	1	1	Yes
2030	1	Yes	49.3507	40-49	Male	Primary or above	Married	22.231	1	70	1	1	1	1	1	1	Yes
2018	1	Yes	60.9726	>=60	Female	Primary or above	Married	22.9421	0	70	2	1	1	2	1	0.8469	Yes
2378	1	Yes	72.5836	>=60	Male	Primary or above	Married	23.4375	0	65	1	1	1	1	1	1	No
2076	1	Yes	60.5616	>=60	Male	Secondary	Married	23.939	0	90	1	1	1	1	1	1	Yes-un-diagnosed
2313	1	Yes	64.5671	>=60	Female	Primary or above	Married	33.7149	1	55	4	2	1	2	3	0.5543	Yes
1398	1	Yes	61.5781	>=60	Male	High school or above	Married	23.4375	0	75	1	1	1	1	1	1	Yes
2330	1	Yes	51.2986	50-59	Male	Primary or above	Married	26.7759	1	70	1	1	1	2	1	0.9161	Yes-un-diagnosed
2029	1	Yes	49.5534	40-49	Male	High school or above	Married	22.0317	0	70	1	1	1	1	2	0.9362	No
2367	1	Yes	53.5699	50-59	Female	Primary or above	Married	24.974	0	80	1	1	1	1	1	1	Yes
2053	1	Yes	45.5507	40-49	Female	Secondary	Single	20.2395	0	70	1	1	1	1	1	1	No
2048	1	Yes	41.6685	40-49	Female	Primary or above	Married	25.3333	0	80	1	1	1	1	1	1	No
2386	1	Yes	64.5781	>=60	Female	High school or above	Divorced	23.5556	0	60	1	1	1	1	1	1	No
2057	1	No	77.8822	>=60	Male	Secondary	Divorced	20.7612	0	70	2	1	1	2	1	0.8469	Yes-un-diagnosed
2254	1	Yes	47.5562	40-49	Male	Primary or above	Married	31.2452	0	75	1	1	1	1	1	1	Yes
1365	1	No	68.5836	>=60	Female	Primary or above	Divorced	24.093	0	70	1	1	1	1	1	1	Yes
2004	1	Yes	56.6137	50-59	Female	Primary or above	Married	32.4219	0	80	1	1	1	1	1	1	Yes
2055	1	Yes	46.5507	40-49	Female	Secondary	Married	22.4766	0	80	1	1	1	1	1	1	No
1356	1	Yes	65.5808	>=60	Female	Primary or above	Married	23.4375	0	80	1	1	1	1	1	1	Yes
2034	1	No	48.5534	40-49	Male	Primary or above	Married	21.5139	0	50	1	1	1	1	2	0.9362	No
2230	1	Yes	51.8932	50-59	Female	Primary or above	Married	21.3599	0	100	1	1	1	1	1	1	No
1337	1	Yes	47.1726	40-49	Female	Primary or above	Married	21.3333	1	100	1	1	1	3	1	0.8479	Yes
1375	1	Yes	42.6	40-49	Male	Secondary	Married	18.026	0	95	1	1	1	1	1	1	Yes
2390	1	No	61.5753	>=60	Female	Primary or above	Married	20.9644	0	50	1	1	1	1	1	1	Yes-un-diagnosed
1377	1	Yes	43.5671	40-49	Male	Primary or above	Married	23.9995	0	100	1	1	1	1	1	1	No
2032	1	Yes	47.063	40-49	Male	Secondary	Married	24.0882	0	90	1	1	1	1	1	1	Yes
2051	1	Yes	42.1233	40-49	Female	High school or above	Divorced	28	0	90	1	1	1	1	1	1	Yes-un-diagnosed
2065	1	Yes	55.5589	50-59	Male	Primary or above	Married	22.9421	1	95	1	1	1	1	1	1	Yes-un-diagnosed
2233	1	Yes	53.1315	50-59	Female	Primary or above	Single	20	1	100	1	1	1	1	1	1	No
2024	1	Yes	61.5616	>=60	Female	High school or above	Married	21.9076	0	80	1	1	1	1	1	1	No
2365	1	Yes	54.5699	50-59	Female	Primary or above	Married	24.8358	0	70	1	1	1	2	1	0.9161	Yes
1353	2	No	58.5753	50-59	Female	Primary or above	Divorced	21.875	0	70	1	1	1	1	1	1	No
2334	1	Yes	63.5781	>=60	Female	Primary or above	Married	24.3418	1	75	1	1	1	2	1	0.9161	No
2998	2	Yes	40.5616	40-49	Female	High school or above	Married	30.1205	0	75	1	1	1	1	1	1	Yes-un-diagnosed
2353	2	Yes	43.5644	40-49	Male	High school or above	Married	23.7387	0	100	1	1	1	1	1	1	Yes-un-diagnosed
1355	1	No	75.589	>=60	Female	Primary or above	Divorced	28	0	65	3	1	1	2	1	0.8376	Yes
1399	1	Yes	63.5808	>=60	Male	Secondary	Married	22.0386	0	95	1	1	1	1	1	1	Yes-un-diagnosed
2395	1	Yes	40.5616	40-49	Female	Primary or above	Married	21.7555	0	70	1	1	1	1	1	1	Yes
2347	1	Yes	48.5671	40-49	Male	Secondary	Married	28.7197	0	70	1	1	1	1	1	1	Yes-un-diagnosed
1336	1	Yes	48.5699	40-49	Female	Secondary	Married	22.0741	0	80	1	1	1	1	1	1	No
1380	1	Yes	47.5699	40-49	Male	Secondary	Married	23.8751	0	70	1	1	1	1	1	1	Yes-un-diagnosed
2062	1	Yes	66.5644	>=60	Male	Primary or above	Married	22.7903	0	50	1	1	1	1	1	1	Yes
2331	1	Yes	59.5753	50-59	Male	Primary or above	Married	18.3391	0	80	1	1	1	1	1	1	Yes
2016	1	Yes	70.5671	>=60	Female	High school or above	Divorced	22.1893	3	30	1	1	1	2	1	0.9161	Yes
2396	1	Yes	47.5671	40-49	Female	Secondary	Married	24.2568	1	100	1	1	1	1	1	1	No
2402	1	Yes	49.5671	40-49	Female	Secondary	Married	22.0604	0	100	1	1	1	1	1	1	No
2359	2	Yes	53.5699	50-59	Female	Primary or above	Married	24.7475	0	75	1	1	1	1	1	1	No
2339	1	Yes	53.8822	50-59	Male	Primary or above	Married	26.8923	4	70	1	1	1	2	1	0.9161	Yes
2282	2	No	70.5699	>=60	Male	Primary or above	Married	21.9076	0	80	1	1	1	2	1	0.9161	Yes-un-diagnosed
2328	1	Yes	50.5671	50-59	Male	Primary or above	Married	21.0962	0	80	1	1	1	1	1	1	Yes-un-diagnosed
2246	1	Yes	45.211	40-49	Female	Primary or above	Married	23.7812	0	50	1	1	1	1	1	1	No
1335	1	Yes	41.5644	40-49	Female	Primary or above	Married	27.5556	0	50	2	1	1	2	1	0.8469	No
2289	1	Yes	40.5507	40-49	Female	Secondary	Married	21.6413	0	90	1	1	1	1	1	1	No
2022	1	No	66.2164	>=60	Female	Primary or above	Divorced	22.0741	3	60	2	1	1	2	1	0.8469	Yes
1350	1	Yes	51.5726	50-59	Female	Primary or above	Married	20.3954	0	90	1	1	1	2	1	0.9161	No
2364	1	Yes	58.9562	50-59	Female	Secondary	Married	26.7405	0	60	1	1	1	1	1	1	Yes
2071	1	Yes	53.0137	50-59	Male	Primary or above	Married	20.1771	1	70	1	1	1	1	1	1	Yes
2074	1	Yes	54.5562	50-59	Male	Primary or above	Married	19.563	0	90	1	1	1	1	1	1	No
2035	1	Yes	44.5507	40-49	Male	Secondary	Married	26.1752	1	100	1	1	1	1	1	1	No
2273	1	Yes	55.5616	50-59	Male	Primary or above	Married	28.3447	0	70	1	1	1	1	1	1	Yes
2244	1	Yes	52.5589	50-59	Female	Secondary	Divorced	21.3039	0	90	2	1	1	2	1	0.8469	Yes
2050	1	Yes	45.5507	40-49	Female	Primary or above	Married	23.5556	0	80	1	1	1	1	1	1	No
2066	2	Yes	58.5589	50-59	Male	Primary or above	Married	17.2248	0	70	1	1	1	1	1	1	No
1354	1	Yes	60.5781	>=60	Female	Secondary	Divorced	27.0993	0	90	1	1	1	1	1	1	No
1383	1	Yes	59.5781	50-59	Male	Primary or above	Married	22.9421	0	65	2	1	1	2	1	0.8469	No
2371	1	No	75.5863	>=60	Male	Primary or above	Married	22.0317	0	70	1	1	1	1	1	1	Yes
2009	1	Yes	59.5616	50-59	Female	Primary or above	Married	25.5661	0	40	1	1	1	1	1	1	Yes
2052	1	Yes	46.2055	40-49	Female	High school or above	Married	24.1415	0	70	1	1	1	1	1	1	Yes
2033	1	Yes	42.6247	40-49	Male	Secondary	Married	23.7228	0	70	1	1	1	2	1	0.9161	Yes
2014	1	Yes	52.3397	50-59	Female	Secondary	Married	24.6097	0	80	1	1	1	2	1	0.9161	No
2248	1	Yes	45.5534	40-49	Male	Primary or above	Married	22.2063	0	10	1	1	1	1	1	1	No
2231	1	Yes	51.5589	50-59	Female	Secondary	Married	28.7201	0	90	1	1	1	1	1	1	No
1363	1	No	65.5808	>=60	Female	Secondary	Married	22.231	1	80	3	1	1	1	1	0.9215	No
2006	1	Yes	51.5562	50-59	Female	Primary or above	Married	28.578	1	70	1	1	1	1	1	1	Yes
1342	1	Yes	41.5644	40-49	Female	Secondary	Married	22.719	0	70	1	1	1	1	1	1	No
2045	1	Yes	44.7041	40-49	Female	Secondary	Married	19.025	0	90	1	1	1	3	3	0.7353	Yes-un-diagnosed
1389	1	Yes	51.7781	50-59	Male	Primary or above	Divorced	17.239	0	75	1	1	1	1	1	1	Yes-un-diagnosed
1364	1	Yes	71.5863	>=60	Female	High school or above	Divorced	23.4375	2	100	1	1	1	1	1	1	Yes
1387	1	Yes	59.5699	50-59	Male	Primary or above	Married	21.3039	0	80	1	1	1	2	2	0.8523	Yes
2267	1	Yes	54.263	50-59	Male	Primary or above	Married	20.3125	0	70	1	1	1	1	1	1	Yes-un-diagnosed
2007	1	Yes	50.5534	50-59	Female	Primary or above	Married	27.1111	0	90	1	1	1	1	1	1	No
1362	1	No	62.5781	>=60	Female	Primary or above	Married	21.0517	2	90	1	1	1	1	1	1	Yes
2043	1	Yes	49.5534	40-49	Female	Primary or above	Married	23.6652	0	90	1	1	1	1	1	1	No
1338	1	Yes	43.5671	40-49	Female	Primary or above	Married	27.9421	0	80	1	1	1	1	1	1	No
2012	1	Yes	50.5534	50-59	Female	Primary or above	Married	27.8876	0	80	1	1	1	2	2	0.8523	Yes-un-diagnosed
2335	1	Yes	55.5726	50-59	Male	Primary or above	Married	19.5312	0	100	1	1	1	1	1	1	Yes-un-diagnosed
1368	1	Yes	43.5671	40-49	Male	Secondary	Married	21.1927	0	70	1	1	1	1	1	1	No
2285	1	Yes	62.5644	>=60	Male	High school or above	Married	22.1003	0	80	1	1	1	1	1	1	Yes
2283	1	No	61.5644	>=60	Male	Secondary	Married	22.4323	2	50	3	1	1	1	3	0.8089	Yes
2389	1	No	75.5863	>=60	Female	Primary or above	Divorced	15.4266	0	50	1	1	1	1	1	1	Yes
1396	1	Yes	63.5808	>=60	Male	Secondary	Divorced	24.9135	0	60	1	1	1	1	1	1	Yes
2245	1	Yes	59.5644	50-59	Female	Primary or above	Divorced	28.0404	1	60	4	1	1	3	3	0.5289	Yes
2303	1	No	68.5699	>=60	Female	Primary or above	Divorced	17.7999	0	70	1	1	1	2	1	0.9161	Yes
2286	1	Yes	47.5562	40-49	Female	Secondary	Married	23.0681	0	70	1	1	1	2	1	0.9161	Yes-un-diagnosed
2366	1	Yes	53.5699	50-59	Female	High school or above	Married	22.0604	0	65	1	1	1	1	2	0.9362	No
3913	1	Yes	60.5315	>=60	Male	Secondary	Married	20.1771	0	75	1	1	1	1	1	1	Yes
1367	1	Yes	44.5671	40-49	Male	Primary or above	Married	19.8141	0	80	1	1	1	1	1	1	No
2001	1	Yes	51.5562	50-59	Female	Primary or above	Married	27.3034	0	50	1	1	1	3	2	0.7841	Yes
1361	1	Yes	69.5836	>=60	Female	Primary or above	Divorced	23.9796	2	60	2	1	1	2	2	0.7831	Yes
1366	1	Yes	46.5671	40-49	Male	Primary or above	Divorced	23.2335	0	70	1	1	1	1	1	1	No
2232	1	Yes	50.5562	50-59	Female	Primary or above	Married	20.0288	0	100	1	1	1	1	1	1	No
2356	1	Yes	47.5671	40-49	Male	High school or above	Married	22.4913	1	80	1	1	1	1	1	1	No
2374	1	Yes	64.5781	>=60	Male	Primary or above	Married	21.83	0	70	1	1	1	1	1	1	Yes-un-diagnosed
2242	1	Yes	59.5644	50-59	Female	Primary or above	Single	25.3333	0	100	1	1	1	1	1	1	No
2256	1	No	47.5562	40-49	Male	Primary or above	Single	22.0604	0	50	5	2	3	1	1	0.5224	Yes
2399	1	Yes	48.6137	40-49	Female	Primary or above	Divorced	21.4031	1	80	1	1	1	1	2	0.9362	No
2370	1	Yes	54.5699	50-59	Female	Secondary	Married	20.5049	0	60	1	1	1	1	1	1	No
2015	1	Yes	56.5342	50-59	Female	Primary or above	Married	27.0993	0	90	2	1	1	2	1	0.8469	Yes
2247	1	Yes	42.5507	40-49	Female	Primary or above	Divorced	20	0	90	1	1	1	1	1	1	No
2270	1	No	57.9288	50-59	Male	Primary or above	Married	21.83	0	90	1	1	1	1	1	1	Yes-un-diagnosed
2292	1	Yes	48.5562	40-49	Female	Primary or above	Married	21.3382	0	80	1	1	1	1	1	1	Yes
2250	1	Yes	43.5534	40-49	Male	Primary or above	Single	24.2187	0	80	1	1	1	1	1	1	Yes-un-diagnosed
1373	1	Yes	45.5671	40-49	Male	Primary or above	Married	23.1837	0		1	1	1	1	1	1	Yes
1382	2	No	43.8356	40-49	Male	Secondary	Divorced	22.0386	3	30	2	2	3	1	3	0.7167	Yes
1237	1	Yes	66.5562	>=60	Male	Secondary	Married	21.4109	0	70	1	1	1	1	1	1	No
1236	1	Yes	66.5479	>=60	Male	Secondary	Married	22.1453	0	70	1	1	1	2	1	0.9161	Yes
2156	1	Yes	59.5562	50-59	Male	Primary or above	Married	19.5312	0	80	1	1	1	2	1	0.9161	Yes-un-diagnosed
3873	1	Yes	45.5205	40-49	Female	Primary or above		23.1405	0	80	1	1	1	2	2	0.8523	No
2077	1	Yes	41.5425	40-49	Female	High school or above	Married	23.8751	0	80	1	1	1	1	1	1	No
3027	1	Yes	63.5699	>=60	Female	Primary or above	Divorced	17.7778	1	90	1	1	1	2	1	0.9161	No
2096	1	Yes	56.4986	50-59	Male	Secondary	Married	21.4844	0	60	1	1	1	1	1	1	Yes-un-diagnosed
2142	1	Yes	72.5644	>=60	Female	High school or above	Married	23.2335	0	90	1	1	1	1	1	1	Yes
1230	1	Yes	53.5479	50-59	Male	High school or above	Married	20.1956	0	70	1	1	1	1	1	1	No
3075	1	Yes	60.5671	>=60	Male	Primary or above	Married	23.8751	0	80	1	1	1	2	1	0.9161	No
1224	1	Yes	54.5479	50-59	Male	Secondary	Married	26.9274	0	70	1	1	1	1	1	1	Yes-un-diagnosed
1233	1	Yes	83.5616	>=60	Male	High school or above	Married	17.9282	0	40	1	1	1	1	1	1	Yes
3043	1	Yes	59.5671	50-59	Male	Primary or above	Married	17.5781	0	75	1	1	1	1	1	1	Yes
2082	1	Yes	45.7863	40-49	Female	Secondary	Married	24.3418	0	70	1	1	1	1	2	0.9362	No
1165	1	Yes	40.5397	40-49	Female	High school or above	Married	19.1001	0	50	1	1	1	1	1	1	No
2118	1	No	56.5534	50-59	Female	High school or above	Married	19.9792	0	80	1	1	1	1	1	1	No
3871	1	Yes	40.5178	40-49	Female	High school or above	Married	25.1039	0	90	1	1	1	1	1	1	No
3862	1	Yes	44.5205	40-49	Male	High school or above	Married	24.7676	0	70	1	1	1	1	1	1	No
1209	1	Yes	46.5342	40-49	Male	High school or above	Married	22.9591	0	95	1	1	1	1	1	1	No
2087	1	Yes	41.5425	40-49	Female	Secondary	Married	20.9644	0	80	2	1	1	1	1	0.9308	No
1242	1	Yes	63.5479	>=60	Male	Secondary	Married	18.3143	2	75	1	1	1	1	1	1	Yes
1240	1	No	65.5479	>=60	Male	High school or above	Married	25.9516	1	70	1	1	1	1	1	1	Yes
1195	1	Yes	73.5534	>=60	Female	High school or above	Married	20	0	90	1	1	1	1	1	1	Yes-un-diagnosed
3009	1	Yes	60.5671	>=60	Female	High school or above	Married	26.1719	0	95	1	1	1	1	1	1	Yes-un-diagnosed
3921	1	Yes	49.5233	40-49	Male	Primary or above	Married	26.8136	0	85	1	1	1	2	2	0.8523	Yes-un-diagnosed
1241	1	Yes	59.5452	50-59	Male	High school or above	Married	24.1415	1	80	2	1	2	1	1	0.8844	Yes
3035	1	Yes	48.5589	40-49	Male	Primary or above	Married	21.6311	0	80	1	1	1	1	1	1	Yes
3046	1	Yes	50.3808	50-59	Male	Primary or above	Married	27.3437	0	90	1	1	1	1	1	1	Yes-un-diagnosed
2149	1	Yes	44.611	40-49	Male	Secondary	Married	28.1625	1	90	1	1	1	1	1	1	No
3919	1	Yes	70.537	>=60	Male	Secondary	Married	21.3039	1	80	2	1	2	1	1	0.8844	Yes
1184	1	Yes	55.5507	50-59	Female	Primary or above	Married	26.6667	1	50	1	1	1	2	1	0.9161	No
3917	1	Yes	48.5233	40-49	Female	Primary or above	Married	25.1486	0	80	1	1	1	2	1	0.9161	No
2109	1	No	71.5644	>=60	Male	Primary or above	Married	17.7778	1	80	1	1	1	1	1	1	Yes
1172	1	Yes	41.5397	40-49	Female	Secondary	Married	19.5312	0	55	1	1	1	2	1	0.9161	No
2143	1	Yes	79.5699	>=60	Female	High school or above	Married	19.9792	0	65	2	1	1	1	2	0.867	Yes
1190	1	Yes	63.5479	>=60	Female	Secondary	Divorced	21.7784	0	80	1	1	1	1	1	1	Yes
1205	1	Yes	43.5342	40-49	Male	High school or above	Married	24.4418	0	80	1	1	1	1	1	1	No
2137	1	Yes	99.5836	>=60	Female	Primary or above	Divorced	23.1111	0	80	1	1	1	1	1	1	Yes
2085	1	Yes	42.8411	40-49	Female	Secondary	Married	23.5556	0	80	1	1	1	1	1	1	No
3843	1	Yes	53.526	50-59	Male	Secondary	Married	23.7954	0	80	1	1	1	1	1	1	No
2125	1	Yes	54.5507	50-59	Female	High school or above	Married	20.8117	0	80	1	1	1	1	1	1	No
1191	1	Yes	68.5507	>=60	Female	Secondary	Married	21.3675	1	80	1	1	1	1	1	1	Yes
3042	1	Yes	53.5589	50-59	Male	Primary or above	Married	20.7612	0	50	1	1	1	2	1	0.9161	No
2153	1	Yes	43.5452	40-49	Male	High school or above	Married	17.5278	0	80	1	1	1	1	1	1	No
1206	1	Yes	48.537	40-49	Male	Secondary	Married	25.6055	0	90	1	1	1	2	1	0.9161	Yes
1215	1	Yes	42.5397	40-49	Male	High school or above	Married	23.634	0	50	1	1	1	1	1	1	No
3867	1	Yes	40.5178	40-49	Female	Secondary	Married	21.9261	0	90	1	1	1	1	1	1	No
3915	1	Yes	50.5233	50-59	Male	High school or above	Married	22.4913	0	80	1	1	1	2	2	0.8523	No
2131	1	No	78	>=60	Female	Secondary	Married	19.7777	1	100	1	1	1	1	1	1	Yes
3068	1	Yes	74.5726	>=60	Male	High school or above	Married	25.6369	0	70	1	1	1	1	1	1	Yes
1183	1	Yes	58.5425	50-59	Female	Primary or above	Divorced	23.4221	2	55	1	1	1	1	1	1	Yes
2105	1	Yes	51.2767	50-59	Male	High school or above	Married	24.9135	0	80	1	1	1	1	1	1	No
1216	1	No	44.5425	40-49	Male	Primary or above	Married	18.2183	0	85	1	1	1	1	1	1	No
3012	1	Yes	42.5534	40-49	Female	Primary or above	Married	19.2901	0	80	1	1	1	2	1	0.9161	No
2084	1	Yes	41.5425	40-49	Female	Secondary	Married	28.251	0	50	1	1	1	1	2	0.9362	No
3063	1	Yes	54.5616	50-59	Female	Primary or above	Divorced	28.0404	0	100	1	1	1	1	1	1	No
2093	1	Yes	42.2932	40-49	Female	High school or above	Married	20.1733	0	50	1	1	1	1	1	1	Yes
3879	1	Yes	64.5342	>=60	Female	Secondary	Divorced	26.2227	0	75	1	1	1	1	1	1	Yes
3916	1	Yes	48.5233	40-49	Male	High school or above	Married	20.0796	0	50	1	1	1	1	1	1	No
1200	1	Yes	73.5534	>=60	Female	Primary or above	Married	18.1787	0	60	1	2	2	1	1	0.9108	Yes
1232	1	No	75.5562	>=60	Male	Secondary	Married	22.2291	0	75	1	1	1	1	1	1	Yes
3866	1	Yes	42.5205	40-49	Female	Primary or above	Married	20	0	80	1	1	1	1	1	1	No
1221	1	Yes	55.5425	50-59	Male	Secondary	Divorced	24.6097	0	80	1	1	1	1	1	1	No
1201	1	Yes	63.5479	>=60	Female	High school or above	Married	18.9736	0	70	1	1	1	1	1	1	Yes
3073	1	Yes	64.5699	>=60	Male	Secondary	Married	19.5312	0	85	1	1	1	1	1	1	Yes
2152	1	Yes	49.5479	40-49	Male	Secondary	Married	24.974	1	90	1	1	1	1	1	1	No
3841	1	Yes	56.5288	50-59	Male	High school or above	Married	23.03	1	80	1	1	1	1	2	0.9362	Yes
2147	1	Yes	48.5479	40-49	Male	Primary or above	Married	25.2174	0	80	1	1	1	1	1	1	No
3019	1	Yes	47.5562	40-49	Female	Primary or above	Married	20.8117	0	70	1	1	1	1	1	1	No
1199	1	Yes	66.5479	>=60	Female	Secondary	Married	23.4952	0	80	1	1	1	1	1	1	Yes
3882	1	Yes	89.5507	>=60	Female	Secondary	Divorced	25.8065	0	80	2	1	1	2	1	0.8469	Yes-un-diagnosed
3029	1	Yes	76.5753	>=60	Female	Primary or above	Single	18.8776	0	50	1	1	1	1	1	1	Yes
3026	1	Yes	60.5671	>=60	Female	Secondary	Married	18.3594	0	65	1	1	1	1	1	1	No
3854	1	Yes	43.5233	40-49	Male	Primary or above	Married	21.3839	0	50	1	1	1	1	1	1	Yes
3070	1	No	61.5671	>=60	Male	Primary or above	Married	19.5312	0	70	1	1	1	1	1	1	Yes-un-diagnosed
1178	1	Yes	53.5397	50-59	Female	High school or above	Married	23.7332	0	95	1	1	1	1	1	1	Yes
2123	1	Yes	52.5507	50-59	Female	Primary or above	Married	23.8751	0	60	4	1	1	3	2	0.5777	No
2157	1	Yes	43.5452	40-49	Male	Primary or above	Married	23.5294	0	90	1	1	1	1	1	1	Yes
3894	1	Yes	53.526	50-59	Female	Primary or above	Married	23.1247	1	80	2	1	1	2	1	0.8469	No
3036	1	Yes	43.5589	40-49	Male	Primary or above	Married	20.3954	0	90	1	1	1	1	1	1	No
1162	1	Yes	48.537	40-49	Female	Secondary	Married	21.7778	0	50	1	1	1	2	1	0.9161	No
1166	1	Yes	44.5342	40-49	Female	High school or above	Married	23.833	1	70	1	1	1	1	1	1	Yes-un-diagnosed
2107	1	No	71.5644	>=60	Male	Primary or above	Divorced	21.4844	2	40	3	1	1	2	2	0.7738	Yes
3865	1	Yes	43.5233	40-49	Female	Primary or above	Married	20.8117	0	90	1	1	1	1	1	1	No
3895	1	Yes	54.526	50-59	Female	High school or above	Married	24.4561	2	90	1	1	1	1	1	1	No
3912	1	Yes	62.5315	>=60	Male	Secondary	Married	25.3906	0	80	1	1	1	1	1	1	Yes
2115	1	Yes	59.2164	50-59	Female	Secondary	Divorced	24.5578	0	85	1	1	1	1	1	1	Yes
2139	1	Yes	75.5671	>=60	Female	High school or above	Married	20.9466	0	80	1	1	1	1	1	1	Yes
3869	1	Yes	41.4932	40-49	Female	Primary or above	Married	22.4323	2	20	1	1	1	2	2	0.8523	No
2161	1	Yes	43.674	40-49	Male	Secondary	Married	26.6728	0	80	1	1	1	1	1	1	Yes
3846	1	Yes	50.5233	50-59	Male	High school or above	Married	21.2585	0	70	1	1	1	1	1	1	Yes-un-diagnosed
3049	1	Yes	56.5644	50-59	Male	Secondary	Married	24.7475	0	80	1	1	1	1	1	1	Yes
1220	1	Yes	50.537	50-59	Male	High school or above	Married	20.3125	0	100	1	1	1	1	1	1	Yes-un-diagnosed
2159	1	Yes	47.5479	40-49	Male	High school or above	Married	26.5338	0	90	1	1	1	1	1	1	No
2114	1	No	73.5644	>=60	Male	Primary or above	Married	18.7328	1	25	3	2	2	3	2	0.6164	Yes
3018	1	Yes	47.5562	40-49	Female	Secondary	Married	19.563	0	80	1	1	1	1	1	1	No
3031	1	Yes	72.5753	>=60	Female	Secondary	Divorced	18.3594	0	70	1	1	1	1	1	1	Yes
3857	1	Yes	41.5205	40-49	Male	Primary or above	Married	21.0937	0	85	1	1	1	1	1	1	Yes-un-diagnosed
2097	1	Yes	54.5507	50-59	Male	Primary or above	Married	24.6097	0	80	1	1	1	1	1	1	Yes
3024	1	Yes	45.5562	40-49	Female	Primary or above	Married	28.0612	0	80	1	1	1	2	1	0.9161	No
3006	1	No	47.5589	40-49	Male	Primary or above	Married	22.6562	1	90	1	1	1	2	1	0.9161	Yes
3022	1	Yes	43.5562	40-49	Female	Primary or above	Married	25.3906	0	80	1	1	1	2	1	0.9161	No
2134	1	Yes	66.4658	>=60	Female	Primary or above	Married	24.974	0	90	1	1	1	1	3	0.8874	Yes-un-diagnosed
3859	1	Yes	47.526	40-49	Male	Secondary	Divorced	22.1003	0	80	1	1	1	1	1	1	No
2078	1	Yes	49.5479	40-49	Female	Primary or above	Divorced	25	0	70	1	1	1	1	2	0.9362	Yes
2100	1	Yes	59.5562	50-59	Male	High school or above	Married	22.9421	0	70	1	1	1	1	1	1	Yes-un-diagnosed
2095	1	Yes	57.4548	50-59	Male	Secondary	Married	20.9572	0	70	1	1	1	1	1	1	No
3072	1	Yes	85.5836	>=60	Male	Secondary	Married	22.2222	0	60	2	2	2	2	2	0.6939	Yes
3891	1	Yes	55.5288	50-59	Female	Secondary	Married	20.83	0	85	1	1	1	1	1	1	No
1177	1	Yes	55.5425	50-59	Female	High school or above	Married	21.6311	0	90	1	1	1	1	1	1	No
3004	1	Yes	40.5507	40-49	Male	Primary or above	Married	21.5451	0	80	1	1	1	1	1	1	No
1225	1	Yes	50.5452	50-59	Male	Secondary	Married	26.4463	0	70	1	1	1	1	1	1	No
2108	1	Yes	70.5616	>=60	Male	Primary or above	Married	20.7612	0	80	1	1	1	1	1	1	Yes-un-diagnosed
3065	1	Yes	57.6082	50-59	Female	Primary or above	Divorced	18.3594	0	80	1	1	1	1	2	0.9362	Yes-un-diagnosed
2086	1	Yes	47.5479	40-49	Female	Secondary	Married	22.2656	0	80	1	1	1	1	1	1	No
3905	1	Yes	76.5452	>=60	Male	High school or above	Single	24.0346	0	100	1	1	1	1	1	1	No
2122	1	Yes	53.0712	50-59	Female	High school or above	Married	22.6003	0	65	1	1	1	1	1	1	No
2154	1	Yes	45.9123	40-49	Male	Secondary	Single	21.2084	0	90	1	1	1	1	1	1	Yes-un-diagnosed
1239	1	Yes	69.5507	>=60	Male	Primary or above	Single	19.3772	0	50	1	1	1	1	1	1	No
3850	1	Yes	55.5288	50-59	Male	Secondary	Married	18.2531	0	85	1	1	1	2	1	0.9161	Yes-un-diagnosed
1218	1	Yes	55.5425	50-59	Male	Primary or above	Married	21.875	0	75	1	1	1	1	2	0.9362	Yes-un-diagnosed
3053	1	Yes	55.5671	50-59	Male	Primary or above	Married	25.5102	1	70	1	1	1	1	1	1	Yes
3013	1	No	82.5808	>=60	Female	Primary or above	Married	22.2222	0	90	1	1	1	1	1	1	Yes-un-diagnosed
3920	1	Yes	66.5342	>=60	Male	Secondary	Married	22.2656	0	70	1	1	1	2	2	0.8523	No
3067	1	Yes	70.5699	>=60	Male	Primary or above	Married	21.7865	0	75	1	1	1	1	1	1	No
3870	1	Yes	41.5178	40-49	Female	High school or above	Married	22.8928	0	70	1	1	1	1	1	1	No
3863	1	Yes	39.5178	40-49	Male	High school or above	Married	24.8016	1	60	1	1	1	1	1	1	No
3037	1	Yes	49.5589	40-49	Male	High school or above	Married	21.83	0	70	1	1	1	3	2	0.7841	Yes-un-diagnosed
1179	1	Yes	50.537	50-59	Female	Primary or above	Married	20.4444	0	80	1	1	1	1	1	1	Yes-un-diagnosed
3877	1	Yes	76.5425	>=60	Female	Primary or above	Married	26.0375	0	35	4	4	3	4	3	0.2053	Yes
1176	1	Yes	55.5425	50-59	Female	Secondary	Divorced	29.6875	1	80	1	1	1	1	1	1	Yes
2148	1	Yes	45.7425	40-49	Male	High school or above	Married	22.571	1	70	1	1	1	1	1	1	Yes
3048	1	Yes	50.5589	50-59	Male	Primary or above	Married	20.1348	0	50	1	1	1	1	2	0.9362	Yes-un-diagnosed
3892	1	Yes	58.5288	50-59	Female	Secondary	Divorced	22.9421	0	90	1	1	1	1	1	1	Yes-un-diagnosed
1170	1	Yes	41.5315	40-49	Female	Secondary	Married	21.6441	0	75	1	1	1	1	1	1	No
3902	1	Yes	59.5315	50-59	Female	Secondary	Divorced	23.4952	0	80	1	1	1	1	1	1	Yes
1160	1	Yes	46.5342	40-49	Female	High school or above	Married	25.5367	0	50	1	1	1	2	2	0.8523	No
2155	1	Yes	40.5425	40-49	Male	Primary or above	Married	23.7954	0	80	1	1	1	1	1	1	Yes
3875	1	Yes	39.5178	40-49	Female	Primary or above	Married	24.6548	0	70	1	1	1	2	1	0.9161	No
2146	1	Yes	47.4795	40-49	Male	Primary or above	Married	21.7193	0	75	1	1	1	1	2	0.9362	No
2102	1	Yes	53.5507	50-59	Male	Secondary	Married	22.2222	0	80	1	1	1	1	1	1	No
3069	1	Yes	70.5726	>=60	Male	High school or above	Married	15.0311	0	70	1	1	1	1	1	1	Yes
1214	1	Yes	47.5452	40-49	Male	High school or above	Married	27.5482	0	80	1	1	1	2	1	0.9161	Yes-un-diagnosed
2129	1	Yes	72.3151	>=60	Female	High school or above	Divorced	20.8889	1	80	2	1	1	1	1	0.9308	Yes
3908	1	Yes	70.537	>=60	Male	High school or above	Married	31.1419	0	80	1	1	1	1	1	1	Yes
3842	1	Yes	54.5014	50-59	Male	Secondary	Married	20.5761	0	90	1	1	1	1	2	0.9362	Yes
3032	1	Yes	47.5589	40-49	Male	Secondary	Married	24.977	0	70	1	1	1	1	1	1	Yes-un-diagnosed
2088	1	Yes	43.5452	40-49	Female	Secondary	Married	20.3954	0	75	2	1	1	1	1	0.9308	Yes-un-diagnosed
3015	1	Yes	61.5671	>=60	Female	Primary or above	Divorced	17.7999	0	70	1	1	1	1	1	1	Yes
1198	1	No	67.5507	>=60	Female	Primary or above	Married	17.313	1	60	1	1	1	2	2	0.8523	No
2090	1	Yes	45.5452	40-49	Female	High school or above	Married	22.6562	0	90	1	1	1	1	1	1	Yes-un-diagnosed
3888	1	Yes	50.5233	50-59	Female	Primary or above	Married	28.3987	1	50	1	1	1	2	1	0.9161	Yes
3860	1	Yes	41.5205	40-49	Male	High school or above	Married	24.977	0	80	1	1	1	1	1	1	No
3062	1	Yes	51.5616	50-59	Female	Primary or above	Married	20.3125	0	55	2	1	1	2	2	0.7831	No
3847	1	Yes	59.5315	50-59	Male	Primary or above	Married	20.5191	3	50	1	1	1	1	1	1	Yes
2132	1	Yes	60.5562	>=60	Female	Primary or above	Married	27.5556	0	100	1	1	1	1	1	1	Yes-un-diagnosed
1173	1	Yes	40.5397	40-49	Female	High school or above	Married	21.3382	0	90	1	1	1	1	1	1	No
3845	1	Yes	59.5315	50-59	Male	High school or above	Married	19.5312	0	75	1	1	1	1	2	0.9362	Yes
1164	1	Yes	40.5315	40-49	Female	Primary or above	Married	22.6667	0	100	1	1	1	1	1	1	No
1223	1	Yes	50.5452	50-59	Male	Primary or above	Married	20	1	75	1	1	1	1	2	0.9362	No
3001	1	Yes	47.5562	40-49	Male	Secondary	Divorced	19.2277	0	50	1	1	1	2	2	0.8523	No
1203	1	Yes	43.5342	40-49	Male	Primary or above	Married	22.4913	0	90	1	1	1	1	1	1	No
3011	1	Yes	54.5616	50-59	Male	Primary or above	Married	19.1001	0	70	1	1	1	1	1	1	Yes-un-diagnosed
3045	1	Yes	51.5616	50-59	Male	Primary or above	Married	18.424	0	80	1	1	1	1	1	1	No
2079	1	Yes	47.5479	40-49	Female	Secondary	Married	27.9421	0	80	1	1	1	1	1	1	No
3020	1	Yes	49.5562	40-49	Female	Secondary	Married	26.2222	0	90	1	1	1	2	1	0.9161	No
3079	2	Yes	60.5671	>=60	Male	Secondary	Divorced	28.2284	1	70	3	1	1	1	1	0.9215	Yes
1222	1	Yes	51.5397	50-59	Male	Primary or above	Married	19.052	0	85	1	1	1	1	1	1	Yes-un-diagnosed
1193	1	Yes	61.5452	>=60	Female	High school or above	Divorced	20.7031	0	70	1	1	1	1	1	1	No
3840	1	Yes	46.5233	40-49	Male	High school or above	Married	22.0386	0	60	1	1	1	3	3	0.7353	Yes-un-diagnosed
3005	1	No	49.5589	40-49	Male	Primary or above	Married	17.6309	0	50	1	1	1	1	1	1	Yes-un-diagnosed
3900	1	Yes	54.526	50-59	Female	Primary or above	Married	19.9762	0	100	1	1	1	1	1	1	Yes-un-diagnosed
3848	1	No	52.526	50-59	Male	Primary or above	Single	22.7204	1	60	2	1	1	1	2	0.867	Yes
3909	2	Yes	74.5397	>=60	Male	High school or above	Married	22.3183	0	80	1	1	1	1	1	1	Yes
1175	1	Yes	54.5479	50-59	Female	High school or above	Married	23.4952	0	90	1	1	1	1	1	1	No
2089	1	Yes	48.5479	40-49	Female	High school or above	Married	19.4771	0	80	1	1	1	1	1	1	No
2138	1	Yes	71.5644	>=60	Female	Primary or above	Married	18.1955	0	80	1	1	1	1	1	1	Yes-un-diagnosed
2150	1	Yes	45.5452	40-49	Male	Secondary	Married	22.5896	0	75	1	1	1	1	2	0.9362	Yes-un-diagnosed
3910	1	Yes	78.5425	>=60	Male	Primary or above	Married	18.4013	0	50	1	1	1	2	1	0.9161	Yes
1171	1	Yes	74.5534	>=60	Female	Secondary	Divorced	23.5078	0	60	1	1	1	2	1	0.9161	No
3907	1	No	67.537	>=60	Male	Primary or above	Married	17.1468	0	80	1	1	1	1	2	0.9362	Yes-un-diagnosed
3061	2	Yes	53.3151	50-59	Female	Primary or above	Married	29.6427	0	50	1	1	1	2	3	0.8035	Yes
2080	1	Yes	43.5452	40-49	Female	Primary or above	Married	19.8791	1	70	1	1	1	1	1	1	No
3890	1	Yes	58.5288	50-59	Female	Secondary	Married	23.3091	0	80	1	1	2	2	1	0.8697	No
2098	1	Yes	55.5534	50-59	Male	Primary or above	Married	17.9282	1	65	1	1	1	1	2	0.9362	No
2133	2	Yes	61.5562	>=60	Female	High school or above	Single	20.0288	0	98	1	1	1	1	1	1	Yes-un-diagnosed
2113	1	No	62.5562	>=60	Male	Primary or above	Married	31.1207	6	35	3	3	3	3	2	0.6009	Yes
1161	1	Yes	48.537	40-49	Female	Primary or above	Married	25.5661	0	95	1	1	1	1	1	1	No
3007	1	Yes	42.5507	40-49	Female	Primary or above	Married	24.4444	0	90	1	1	1	1	1	1	No
2110	1	Yes	60.5562	>=60	Male	Secondary	Married	24.623	0	70	1	1	1	1	1	1	Yes
2116	1	Yes	59.5452	50-59	Female	Primary or above	Married	27.3399	0	50	1	2	1	2	1	0.8733	No
3014	1	No	50.5589	50-59	Male	High school or above	Married	23.2335	1	85	1	1	1	1	1	1	Yes
2128	1	Yes	64.5589	>=60	Female	Primary or above	Married	23.5556	0	95	1	1	1	1	1	1	No
2127	1	Yes	55.5534	50-59	Female	Primary or above	Married	21.4844	0	50	1	1	1	2	1	0.9161	No
1189	1	No	67.5507	>=60	Female	Secondary	Divorced	23.8728	0	50	1	1	1	2	1	0.9161	Yes-un-diagnosed
1210	1	Yes	42.5397	40-49	Male	High school or above	Married	18.75	0	75	1	1	1	1	1	1	No
3901	1	Yes	54.526	50-59	Female	Secondary	Divorced	19.9792	0	80	1	1	1	1	1	1	No
3903	1	Yes	53.526	50-59	Female	Secondary	Married	25.6369	0	80	1	1	1	1	1	1	No
3911	1	No	68.537	>=60	Male	Primary or above	Married	19.6283	0	70	1	1	1	1	1	1	Yes-un-diagnosed
2092	1	Yes	40.4192	40-49	Female	High school or above	Married	23.4221	2	90	1	1	1	1	1	1	Yes
1163	1	Yes	40.5315	40-49	Female	High school or above	Married	23.7332	0	80	1	1	1	1	1	1	No
1229	1	Yes	54.5479	50-59	Male	High school or above	Married	25.7117	0	75	1	1	1	1	1	1	No
3864	1	Yes	48.526	40-49	Female	Secondary	Married	21.436	1	90	1	1	1	4	1	0.73	No
2111	1	Yes	65.5589	>=60	Male	Secondary	Married	27.3437	0	75	1	1	1	1	1	1	Yes
3851	1	Yes	52.526	50-59	Male	Secondary	Married	26.1752	1	70	1	1	1	1	1	1	Yes
1213	1	Yes	43.5342	40-49	Male	Primary or above	Married	19.7232	0	90	1	1	1	1	1	1	No
2094	1	Yes	47.4027	40-49	Female	High school or above	Married	23.2335	0	60	1	1	1	1	1	1	No
1192	1	Yes	66.5479	>=60	Female	High school or above	Married	23.3377	0	80	1	1	1	1	1	1	No
3017	1	Yes	40.3918	40-49	Female	Secondary	Married	20.2848	0	50	1	1	1	1	2	0.9362	No
3021	1	Yes	44.7836	40-49	Female	Primary or above	Married	22.9481	0	100	1	1	1	1	1	1	No
3880	1	Yes	64.5342	>=60	Female	Primary or above	Divorced	13.3333	0	50	1	1	1	2	2	0.8523	Yes
2104	1	Yes	55.5534	50-59	Male	Primary or above	Married	24.2215	0	80	1	1	1	1	1	1	Yes
3023	1	Yes	45.5562	40-49	Female	Secondary	Married	24.7676	0	50	1	1	1	1	1	1	No
1182	1	Yes	59.5425	50-59	Female	Secondary	Divorced	27.5556	3	70	1	1	1	2	1	0.9161	Yes
2923	1	Yes	60.5315	>=60	Female	Secondary	Married	24.1415	0	10	2	1	1	2	1	0.8469	Yes
1228	1	Yes	55.5425	50-59	Male	Secondary	Married	22.3081	1	60	1	1	1	1	1	1	Yes-un-diagnosed
2135	1	Yes	73.874	>=60	Female	Primary or above	Divorced	24.4898	0	85	1	1	1	1	1	1	Yes-un-diagnosed
3849	1	Yes	55.5288	50-59	Male	Secondary	Married	21.83	1	90	2	1	1	1	1	0.9308	No
3047	1	Yes	53.5616	50-59	Male	Primary or above	Married	22.8624	0	98	1	1	1	1	1	1	Yes-un-diagnosed
3858	1	Yes	46.5233	40-49	Male	High school or above	Married	25.7117	0	70	1	1	1	1	1	1	No
3844	1	Yes	55.5288	50-59	Male	Primary or above	Married	24.6181	1	50	1	1	1	2	1	0.9161	Yes
1202	1	Yes	49.5452	40-49	Male	High school or above	Married	18.6851	0	65	1	1	1	1	1	1	No
1207	1	Yes	48.537	40-49	Male	High school or above	Married	26.1286	0	75	1	1	1	1	1	1	Yes-un-diagnosed
2083	1	Yes	42.9014	40-49	Female	High school or above	Married	25.8065	0	80	1	1	1	1	1	1	Yes
1159	1	Yes	42.5315	40-49	Female	Secondary	Married	21.0517	0	80	1	1	1	1	1	1	No
3896	1	Yes	54.526	50-59	Female	Primary or above	Married	23.5556	1	40	2	1	1	3	3	0.6661	Yes
2124	1	Yes	52.5507	50-59	Female	Primary or above	Married	20.9566	0	95	1	1	1	1	1	1	No
1204	1	Yes	42.5315	40-49	Male	High school or above	Married	27.3437	0	80	1	1	1	2	1	0.9161	Yes-un-diagnosed
3002	1	No	71.5753	>=60	Female	Primary or above	Divorced	24.5243	3	60	1	1	1	1	1	1	Yes
3060	1	Yes	56.4384	50-59	Female	Primary or above	Married	24	0	50	1	1	1	1	1	1	No
3052	1	Yes	51.5616	50-59	Male	High school or above	Married	17.7154	0	60	1	1	1	1	1	1	No
3058	1	No	57.5616	50-59	Female	Secondary	Married	29.903	2	10	2	2	1	2	2	0.7403	Yes
3914	1	Yes	53.526	50-59	Male	Secondary	Married	20.5693	1	80	1	1	1	1	1	1	No
1185	1	Yes	57.5425	50-59	Female	High school or above	Married	18.8271	1	50	1	1	1	1	1	1	No
1188	1	Yes	56.5425	50-59	Female	Primary or above	Married	24.0346	0	80	1	1	1	1	1	1	No
2130	1	No	69.5616	>=60	Female	Primary or above	Married	20	1	80	1	1	1	1	1	1	No
3056	1	Yes	56.5616	50-59	Female	Primary or above	Married	24.5578	0	95	1	1	1	1	1	1	No
2136	1	Yes	70.5616	>=60	Female	Primary or above	Married	26.4792	1	70	2	1	1	2	1	0.8469	Yes
3883	1	Yes	66.5342	>=60	Female	Primary or above	Divorced	24.8016	0	50	2	1	1	2	2	0.7831	Yes
3074	1	Yes	68.5726	>=60	Male	Secondary	Married	27.4348	0	75	1	1	1	2	1	0.9161	Yes-un-diagnosed
3050	1	Yes	52.5616	50-59	Male	Primary or above	Married	25.7117	0	80	1	1	1	1	1	1	Yes-un-diagnosed
3885	1	Yes	64.5342	>=60	Female	Primary or above	Divorced	25.5102	0	80	1	1	1	2	2	0.8523	No
2081	1	Yes	45.5452	40-49	Female	High school or above	Married	21.2084	0	80	1	1	1	1	1	1	No
2151	1	Yes	42.5425	40-49	Male	High school or above	Married	23.5294	0	75	1	1	1	1	1	1	No
1234	1	Yes	64.5479	>=60	Male	Primary or above	Married	21.9671	0	70	1	1	1	1	1	1	Yes
2140	1	Yes	71.5644	>=60	Female	Primary or above	Married	24.1415	1	70	1	1	1	1	1	1	Yes
3030	1	Yes	69.5699	>=60	Female	Primary or above	Married	17.0392	0	65	1	1	1	1	1	1	No
3856	1	Yes	44.5233	40-49	Male	Secondary	Married	29.4118	0	90	1	1	1	1	1	1	No
3887	1	Yes	54.526	50-59	Female	Primary or above	Married	24.8889	0		1	1	1	1	1	1	Yes
3874	1	Yes	40.5178	40-49	Female	Primary or above	Divorced	23.3726	0	0	2	1	1	2	2	0.7831	No
3034	1	Yes	45.5562	40-49	Male	Primary or above	Married	18.6667	0	100	1	1	1	1	2	0.9362	No
2091	1	Yes	47.5479	40-49	Female	Secondary	Married	18.2563	0	95	1	1	1	1	1	1	No
3922	2	Yes	45.5205	40-49	Female	Primary or above	Married	21.3675	0	80	1	1	1	2	1	0.9161	Yes-un-diagnosed
2120	1	Yes	58.5534	50-59	Female	Secondary	Married	22.4766	0	85	1	1	1	1	1	1	Yes
3886	1	Yes	65.5342	>=60	Female	Primary or above	Married	24.1415	1	50	2	1	1	2	1	0.8469	No
1174	1	Yes	41.5315	40-49	Female	Primary or above	Married	27.0258	0	80	1	1	1	1	1	1	Yes-un-diagnosed
1196	1	Yes	69.5507	>=60	Female	Primary or above	Divorced	20.8117	0	100	1	1	1	1	1	1	No
3897	1	Yes	58.5288	50-59	Female	High school or above	Married	22.83	1	80	1	1	1	1	1	1	Yes
3051	1	Yes	57.5671	50-59	Male	Primary or above	Married	21.3039	0	90	1	1	1	1	1	1	No
1168	1	Yes	46.5342	40-49	Female	Secondary	Married	22.5069	0	95	1	1	1	1	1	1	No
3855	1	Yes	43.5233	40-49	Male	High school or above	Married	22.3081	0	80	1	1	1	1	1	1	No
1227	1	Yes	51.5397	50-59	Male	High school or above	Divorced	27.7177	0	80	1	1	1	1	1	1	No
3889	1	Yes	54.526	50-59	Female	Secondary	Single	26.5625	5	75	1	1	1	1	1	1	No
3876	1	Yes	79.5452	>=60	Female	Primary or above	Married	22.2222	1	100	1	1	1	1	1	1	Yes
3039	1	No	58.5644	50-59	Male	Primary or above	Married	20.4491	0	70	1	1	1	1	1	1	Yes
3055	1	Yes	55.5644	50-59	Female	Primary or above	Married	29.7778	0	80	1	1	1	1	1	1	Yes
1212	1	Yes	43.5342	40-49	Male	Primary or above	Married	22.7732	0	85	1	1	1	2	1	0.9161	Yes
3054	1	Yes	55.5616	50-59	Male	Primary or above	Married	19.0311	0	70	1	1	1	1	1	1	Yes-un-diagnosed
3066	1	Yes	67.5726	>=60	Male	High school or above	Married	21.83	0	80	1	1	1	1	1	1	No
1217	1	Yes	41.5397	40-49	Male	Secondary	Married	21.9525	0	80	1	1	1	1	1	1	Yes
3059	1	Yes	51.5589	50-59	Female	Secondary	Single	25.8065	0	80	1	1	1	1	1	1	Yes
3868	1	Yes	47.5233	40-49	Female	Secondary	Married	24.3418	0	80	1	1	1	1	1	1	Yes
3028	1	Yes	63.5671	>=60	Female	Primary or above	Married	24.7325	0	70	1	1	1	1	1	1	Yes
3016	1	Yes	47.5589	40-49	Male	Primary or above	Married	22.9421	0	90	1	1	1	1	1	1	Yes-un-diagnosed
1167	1	Yes	46.5342	40-49	Female	Primary or above	Married	19.1746	0	70	1	1	1	1	1	1	No
3071	1	Yes	61.5644	>=60	Male	Secondary	Married	22.1003	1	50	1	1	1	1	1	1	Yes
3077	1	Yes	64.5726	>=60	Male	Secondary	Married	21.6041	0	80	1	1	1	1	1	1	Yes
2126	1	Yes	57.5534	50-59	Female	High school or above	Married	23.3355	0	50	2	1	2	2	2	0.7367	Yes
3008	1	Yes	46.5562	40-49	Male	Primary or above	Married	18.3594	0	75	1	1	1	1	2	0.9362	No
1180	1	Yes	59.5452	50-59	Female	Primary or above	Married	29.0816	1	50	1	1	1	1	1	1	No
2119	1	Yes	52.5507	50-59	Female	Primary or above	Single	17.898	0	50	1	1	1	2	2	0.8523	No
3899	1	Yes	56.5288	50-59	Female	Primary or above	Married	20.9566	0	98	1	1	1	2	1	0.9161	No
2112	1	Yes	61.5562	>=60	Male	High school or above	Married	22.0317	1	60	1	1	1	1	1	1	Yes
1219	1	Yes	59.5452	50-59	Male	High school or above	Married	29.0657	1	80	1	1	1	1	1	1	Yes
3064	1	Yes	51.5644	50-59	Female	Primary or above	Divorced	22.0741	0	70	1	1	1	1	1	1	No
3033	1	Yes	46.5562	40-49	Male	Primary or above	Married	23.6244	0	95	1	1	1	1	1	1	No
3041	1	Yes	59.5671	50-59	Male	Primary or above	Married	29.2969	0	85	1	1	1	1	1	1	Yes
3010	1	No	64.5699	>=60	Male	Primary or above	Married	22.0317	0	50	2	1	1	1	1	0.9308	Yes-un-diagnosed
3076	1	No	81.5808	>=60	Male	Primary or above	Divorced	23.3091	0	60	1	1	1	1	1	1	Yes
3040	1	No	59.5671	50-59	Male	Primary or above	Married	17.898	0	70	1	1	1	1	1	1	Yes
3044	1	Yes	59.8219	50-59	Male	Primary or above	Married	18.3655	0	50	1	1	1	1	1	1	No
2099	1	Yes	51.5507	50-59	Male	Primary or above	Married	23.5556	0	85	1	1	1	2	1	0.9161	No
1187	1	Yes	56.5425	50-59	Female	Primary or above	Married	25.3906	0	60	1	1	1	1	1	1	No
2106	1	Yes	63.5589	>=60	Male	Primary or above	Married	18.7328	0	85	1	1	1	1	1	1	No
3057	1	Yes	55.5644	50-59	Female	Secondary	Married	21.3333	0	60	1	1	1	1	3	0.8874	No
2121	1	Yes	57.8822	50-59	Female	High school or above	Divorced	24.0346	0	70	1	1	1	1	2	0.9362	Yes-un-diagnosed
3853	1	Yes	46.5205	40-49	Male	High school or above	Married	21.3839	0	60	1	1	1	1	2	0.9362	Yes-un-diagnosed
3872	1	Yes	44.5205	40-49	Female	High school or above	Married	21.6441	0	90	1	1	1	1	1	1	Yes
3918	1	Yes	49.5233	40-49	Male	Primary or above	Married	24.0055	0	70	1	1	1	1	1	1	No
3025	1	Yes	48.5589	40-49	Female	Secondary	Married	23.8054	0	60	1	1	1	3	2	0.7841	No
2101	1	Yes	53.5507	50-59	Male	High school or above	Married	23.9512	0	75	1	1	1	1	1	1	Yes
3003	1	Yes	58.5644	50-59	Male	Primary or above	Married	22.9421	0	55	2	2	2	2	2	0.6939	Yes
2117	1	Yes	52.5507	50-59	Female	Primary or above	Married	24.974	0	80	1	1	1	1	1	1	No
1181	1	Yes	53.5397	50-59	Female	Primary or above	Married	29.2969	0	90	1	1	1	1	1	1	Yes-un-diagnosed
1226	1	Yes	51.5479	50-59	Male	Secondary	Married	28.8889	0	80	1	1	1	1	1	1	Yes-un-diagnosed
1211	1	Yes	40.5397	40-49	Male	Secondary	Married	22.3214	2	80	1	1	1	1	1	1	Yes
2145	1	Yes	44.6877	40-49	Male	Secondary	Married	25.2595	0	95	1	1	1	1	1	1	No
3078	1	Yes	60.5671	>=60	Male	Primary or above	Married	22.3757	0	90	1	1	1	1	1	1	Yes-un-diagnosed
1208	1	Yes	42.5315	40-49	Male	Secondary	Married	27.8852	0	80	1	1	1	1	1	1	Yes-un-diagnosed
3861	1	Yes	40.5178	40-49	Male	High school or above	Married	21.875	0	70	1	1	1	1	2	0.9362	No
1186	1	Yes	51.5479	50-59	Female	Primary or above	Married	18.7962	1	70	1	1	1	1	1	1	Yes
2141	1	No	75.5671	>=60	Female	Primary or above	Married	21.9289	0	100	1	1	1	1	1	1	No
3884	1	Yes	61.5315	>=60	Female	Secondary	Married	20.83	0	50	1	1	1	1	1	1	No
3878	1	Yes	67.537	>=60	Female	High school or above	Married	23.1911	0	85	2	1	1	1	1	0.9308	No
1231	1	Yes	61.5452	>=60	Male	High school or above	Married	27.968	0	70	2	1	1	2	1	0.8469	No
3893	1	Yes	51.526	50-59	Female	High school or above	Married	26.2227	1	90	1	1	1	1	1	1	Yes
1169	1	Yes	48.537	40-49	Female	Primary or above	Married	24.1603	0	70	1	1	1	1	2	0.9362	No
2103	1	Yes	51.2849	50-59	Male	High school or above	Married	24.2215	0	75	1	1	1	1	1	1	No
3038	1	Yes	55.5644	50-59	Male	High school or above	Married	23.8754	0	80	1	1	1	1	1	1	Yes-un-diagnosed
3881	1	Yes	68.526	>=60	Female	High school or above	Divorced	24	1	50	1	1	1	2	1	0.9161	Yes
2158	1	Yes	40.5425	40-49	Male	High school or above	Married	29.4078	2	70	1	1	1	1	1	1	Yes-un-diagnosed
1235	1	Yes	62.5452	>=60	Male	High school or above	Married	21.3382	0	60	1	1	1	2	1	0.9161	Yes
2160	1	Yes	47.7973	40-49	Male	High school or above	Married	24.7721	0	100	1	1	1	1	1	1	Yes
3904	1	No	62.5342	>=60	Male	Primary or above	Married	18.3655	0	60	1	1	1	1	1	1	No
3906	1	Yes	62.5315	>=60	Male	Primary or above	Married	21.0498	2	70	1	1	1	1	1	1	Yes
1197	1	Yes	62.5452	>=60	Female	High school or above	Divorced	23.7088	0	60	1	1	1	1	1	1	Yes
1194	1	Yes	67.5507	>=60	Female	Primary or above	Married	21.2279	0	50	2	1	1	2	1	0.8469	Yes
1238	1	Yes	64.5562	>=60	Male	Secondary	Married	25.0762	0	60	2	1	1	1	1	0.9308	Yes
3852	1	Yes	57.5288	50-59	Male	Primary or above	Married	21.4533	0	55	1	1	1	3	2	0.7841	No
3924	1	Yes	53.526	50-59	Female	High school or above	Divorced	22.4766	0	50	3	1	2	2	1	0.7912	No
2144	1	Yes	63.5589	>=60	Female	High school or above	Divorced	21.3675	1	100	1	1	1	1	1	1	Yes
